1

2 **Title:**

3 **Transcriptomes and metabolism define mouse and human MAIT cell**  
4 **heterogeneity**

5

6 Shilpi Chandra<sup>1,2#\*</sup>, Gabriel Ascuí<sup>1,2,3#</sup>, Thomas Riffelmacher<sup>1,2,4#</sup>, Ashu Chawla<sup>5</sup>, Ciro  
7 Ramirez-Suastegui<sup>1,6</sup>, Viankail Cedillo Castelan<sup>1,2</sup>, Gregory Seumois<sup>1,6</sup>, Hayley Simon<sup>1,6</sup>,  
8 Mallory Paynich Murray<sup>1,2</sup>, Goo-Young Seo<sup>1,2</sup>, Ashmitaa Logandha Ramamoorthy  
9 Premal<sup>5</sup>, Greet Verstichel<sup>1,6</sup>, Yingcong Li<sup>1,2,7</sup>, Chia-Hao Lin<sup>7</sup>, Jason Greenbaum<sup>5</sup>, John  
10 Lamberti<sup>8,9</sup>, Raghav Murthy<sup>8,10</sup>, John Nigro<sup>8</sup>, Hilde Cheroutre<sup>1,6</sup>, Christian H.  
11 Ottensmeier<sup>11</sup>, Stephen M. Hedrick<sup>7,12</sup>, Li-Fan Lu<sup>7,13,14</sup>, Pandurangan Vijayanand<sup>1,6</sup> and  
12 Mitchell Kronenberg<sup>1,2,7\*</sup>

13

14 # Equal contribution

15 1 Center for Autoimmunity and Inflammation, La Jolla Institute for Immunology, La Jolla,  
16 CA 92037 USA

17 2 Center for Infectious Disease and Vaccine Research, La Jolla Institute for  
18 Immunology, La Jolla, CA 92037 USA

19 3 Department of Medicine, University of California, San Diego, La Jolla, CA 92093 USA

20 4 Kennedy Institute of Rheumatology, University of Oxford, Oxford, OX3 7FY UK

21 5 Bioinformatics Core Facility, La Jolla Institute for Immunology, La Jolla, CA 92037  
22 USA

23 6 Center for Cancer Immunotherapy, La Jolla Institute for Immunology, La Jolla, CA

24 92037 USA

25 7 Division of Biological Sciences, University of California, San Diego, La Jolla, CA

26 92037 USA

27 8 Division of Cardiac Surgery, Rady Children's Hospital, San Diego, CA 92123 USA

28 9 Division of Pediatric Cardiac Surgery, Falk Cardiovascular Research Center, Stanford,

29 CA 94305-5407 USA

30 10 Division of Pediatric Cardiac Surgery, Children's Heart Center Icahn School of

31 Medicine at Mount Sinai, New York, NY 10029

32 11 Liverpool Head and Neck Center, Institute of Systems, Molecular and Integrative

33 Biology, University of Liverpool, Liverpool, UK, L69 7ZB

34 12 Department of Cellular and Molecular Medicine, University of California, San Diego,

35 La Jolla, CA, 92093 USA

36 13 Center for Microbiome Innovation, University of California, San Diego, La Jolla, CA,

37 92093 USA

38 14 Moores Cancer Center, University of California, San Diego, La Jolla, CA, 92093 USA

39 \* Correspondence: S.C. ([schandra@lji.org](mailto:schandra@lji.org)) or M.K. ([mitch@lji.org](mailto:mitch@lji.org))

40

41 **Abstract**

42 Mucosal-associated invariant T (MAIT) cells are a subpopulation of T lymphocytes that  
43 respond to microbial metabolites. We performed single-cell RNA sequencing and  
44 metabolic analyses of MAIT cell subsets in thymus and peripheral tissues from mice  
45 and humans to define the heterogeneity and developmental pathway of these innate-  
46 like lymphocytes. We show that the predominant mouse subset, which produces IL-17  
47 (MAIT17), and the subset that produces IFN $\gamma$  (MAIT1), have greatly different  
48 transcriptomes and metabolic states in the thymus and periphery. A splenic MAIT  
49 subset has a transcriptome similar to circulating lymphocytes, and in mice these also  
50 are found in recent thymic emigrants, suggesting partially mature cells emigrate from  
51 the thymus. Human MAIT cells are predominantly MAIT1 cells, but have a different  
52 metabolism from their mouse counterparts with increased fatty acid uptake and storage.  
53 Although mouse and human subsets are similar in thymus, in the periphery they  
54 diverge, likely reflecting environmental influences.

55

56 **Introduction:**

57 Mucosal-associated invariant T (MAIT) cells are found in humans, mice and many other  
58 mammals<sup>1</sup>. They recognize MR1, a non-polymorphic major histocompatibility complex  
59 (MHC)-class I-like protein that binds to 5-(2-oxopropylideneamino)-6-D-ribitylaminouracil  
60 (5-OP-RU) and other riboflavin-derived metabolites produced by bacteria and yeast<sup>2, 3,</sup>  
61 <sup>4, 5, 6, 7</sup>. MAIT cells are abundant in humans, but relatively rare in laboratory mice<sup>8, 9, 10</sup>. In  
62 humans, MAIT cells have a restricted  $\alpha\beta$  T cell receptor (TCR), in which the TCRV $\alpha$   
63 chain comprises a canonical V $\alpha$ 7.2-J $\alpha$ 33 (TRAV1-2-TRAJ33) rearrangement, paired  
64 with a limited number of TCR $\beta$  chains. The mouse MAIT cell TCR is made up  
65 predominantly of a homologous V $\alpha$ 19-J $\alpha$ 33 (TRAV1-TRAJ33) TCR $\alpha$  chain associated  
66 with a limited set of V $\beta$  segments<sup>3, 4, 11</sup>. Activated MAIT cells proliferate, and rapidly  
67 secrete pro-inflammatory cytokines, as well as cytotoxic effector molecules such as  
68 perforin and granzymes<sup>12, 13</sup>. These properties suggest that MAIT cells function as first  
69 responders to microbial infections, while in some cases, contributing to abnormal  
70 inflammatory reactions<sup>14, 15</sup>.

71

72 Like other T cell populations, MAIT cells originate in the thymus, but their positive  
73 selection is dependent on double positive thymocytes, similar to invariant Natural Killer  
74 T (iNKT) cells<sup>16, 17</sup>. A stepwise development based on the surface expression of CD24  
75 and CD44 has been described previously for MAIT cells in mouse thymus<sup>9, 10</sup>. Similarly,  
76 for humans, thymus stages are defined based on expression of CD27 and CD161<sup>9, 16</sup>.  
77 Some thymic MAIT cells exhibit effector functions typical of differentiated peripheral T  
78 cells, a property found in other innate-like T cells including iNKT cells and  $\gamma\delta$  T cells<sup>18, 19</sup>.



79 MAIT cell heterogeneity has been demonstrated by several recent reports<sup>10, 20, 21, 22, 23</sup>.  
80 The predominant mouse MAIT cell subset in the thymus and elsewhere is characterized  
81 by the expression of ROR $\gamma$ T and other surface markers, as well as IL-17 secretion after  
82 activation, and therefore they are considered to be MAIT17 cells, analogous to CD4<sup>+</sup>  
83 Th17 cells. A T-bet-expressing MAIT1 population that secretes IFN $\gamma$  also has been  
84 characterized<sup>8, 9, 24, 25</sup>. In humans, most MAIT cells fit into the MAIT1 category, but a  
85 minority of MAIT cells capable of producing IL-17 have been found in tissues<sup>26, 27</sup>. In  
86 contrast to conventional T cells, MAIT cells may encounter their natural antigen during  
87 thymic differentiation as metabolites from riboflavin-synthesizing bacteria enter the  
88 thymus<sup>28</sup>. As a result, MAIT cells are agonist-selected and appear antigen-experienced,  
89 and in addition to their immediate effector functions, they also express memory  
90 markers<sup>29</sup>. Memory-like vs effector-like states in conventional CD4<sup>+</sup> and CD8<sup>+</sup> T cells  
91 are controlled by mutually exclusive metabolic states<sup>30, 31</sup>, and thus the question  
92 remains as to which programs MAIT cells adopt at steady-state. As natural effector  
93 cells, we might expect that the metabolic state of MAIT cells would be different from  
94 naïve CD4 and CD8 T cells. Therefore, here we have taken an unbiased approach to  
95 characterize MAIT cell heterogeneity in mouse and human cells from different organs by  
96 analyzing transcriptomes and metabolic parameters. Our data confirm the acquisition of  
97 effector function and also a different metabolic state, even in the thymus. Furthermore,  
98 the data reveal additional MAIT cell subsets, including circulatory MAIT cells, that  
99 include precursors of more mature cells. Additionally, we show that despite the  
100 conservation of their specificities, the peripheral subsets of human and mouse MAIT

101 cells defined here are not highly similar, and the status of mouse MAIT cells is subject  
102 to influences from the environment.

103

## 104 **Results:**

105 **Transcriptomic and phenotypic heterogeneity of mouse MAIT cells.** To  
106 characterize mouse MAIT cells, we sorted 5-OP-RU loaded mouse MR1 tetramer<sup>+</sup> cells  
107 (**Extended Data Fig. 1A**) from thymus, lung, liver and spleen from C57BL/6J mice and  
108 subjected them to single-cell RNA sequencing (scRNA-seq). We used the R package  
109 Seurat to perform a dimensional reduction and the Louvain algorithm to cluster cells.  
110 scRNA-seq of mouse MAIT cells revealed 11 clusters (**Fig. 1A and Supplementary**  
111 **Table 1**). Of note, the composition of the clusters was not evenly distributed across the  
112 four tissue sources (**Fig 1B and Extended Data 1B**): Cluster 6 was purely thymus-  
113 derived, clusters 3 and 7 were almost entirely from the lung, and clusters 1 and 8 had  
114 the highest proportion of cells from the liver, with relatively little representation of lung  
115 MAIT cells (**Fig. 1B, Extended Data Fig. 1B**).

116 MAIT cell transcriptomes in different clusters could be associated with function as well  
117 as preferential tissue location. We used a gene signature for MAIT1 and MAIT17  
118 phenotypes, based on an earlier RNA microarray of MAIT cells<sup>21</sup>, to define clusters  
119 enriched in these signatures. This analysis showed that MAIT cells in clusters 0, 3, 5  
120 and 9 were enriched for MAIT17 signature (**Fig. 1C**). For example, the most  
121 differentially expressed genes (DEG) in MAIT cells of the largest cluster (cluster 0),  
122 including *Il18r1*, *Ramp1*, *Fos* and *Tmem176A* (**Fig 1D and Supplementary Table 1**),

123 also were highly expressed in **IL-17 producing iNKT cells (NKT17 cells)**<sup>32, 20, 33, 34</sup>. On  
124 the other hand, Cluster 1 MAIT cells were enriched in Th1/NKT1 genes<sup>32, 20, 33, 34</sup>  
125 including *Cd160*, *Klrb1c*, *Xcl1*, *Cxcr3* and *Gimap4* (**Fig. 1D**). Additional MAIT cell  
126 clusters were distinguished by the expression of cell cycle genes or genes related to  
127 cytotoxicity (**Fig. 1D**). Cluster 2 and 4 were not enriched for either MAIT1 or MAIT17 but  
128 express circulatory cell markers such as *Sell*.

129 We used high-parameter flow cytometry and dimensional reduction to validate the  
130 phenotypic heterogeneity of MAIT cells. The majority of mouse MAIT cells could be  
131 divided into two populations based on the expression of markers defined from our  
132 transcriptomic analysis, ICOS and CXCR3. While ICOS expression strongly correlated  
133 with the expression of ROR $\gamma$ T, suggesting ICOS marks MAIT17 cells (**Fig. 1E, 1F and**  
134 **Extended Data Fig. 1C**), CXCR3 correlated with T-bet, suggestive of a MAIT1  
135 population (**Fig. 1E, Extended Data Fig. 1C**). As expected from the transcriptomic  
136 analysis, flow cytometry indicated that the ICOS<sup>+</sup> MAIT17 cells were represented in all  
137 four organs (**Fig. 1F and Extended Data Fig. 1D**). Of note, MAIT17 cells (CXCR3<sup>-</sup>,  
138 CD62L<sup>-</sup>) could be further divided based on Syndecan-1 (SDC1/CD138) expression into  
139 MAIT17a cells (SDC1<sup>+</sup>), and MAIT17b (SDC1<sup>-</sup>) populations (**Fig 1F, Extended Data**  
140 **Fig. 1E**). Selective Syndecan-1 has been reported to negatively regulate other innate-  
141 like IL-17-producing T cells, including iNKT cells and  $\gamma\delta$  T cells<sup>35</sup> but in binding to extra  
142 cellular matrix proteins, Syndecan-1 expression also could be important for tissue  
143 maintenance. Both MAIT17 subsets had the highest prevalence in lung tissue, while  
144 CXCR3<sup>+</sup> MAIT1-like cells were present predominantly in liver (**Fig 1E, 1F, Extended**

145 **Data Fig. 1D, 1F).** This distribution is similar to the iNKT cell functional subsets in  
146 different sites<sup>32</sup>.

147 We tested the functional capacity of these MAIT cell subsets by measuring cytokine  
148 production following stimulation. There were differences in the degree of activation of  
149 cells from different tissues, but MAIT cells capable of producing IL-17 were found in all  
150 organs, including the thymus (**Fig. 1G**). IFN $\gamma$  and TNF producing cells were most  
151 prevalent in the spleen and liver, consistent with the scRNA-seq and flow cytometry  
152 indicating enrichment for MAIT1 cells in these sites, but some MAIT thymocytes also  
153 produced these cytokines. Together, these data indicate a strong correlation between  
154 transcriptomic, phenotypic, and functional data in defining MAIT1, heterogenous  
155 MAIT17 states and some subsets that did not fit into either category. The different  
156 subsets were present to varying degrees in all tested tissues, with the exception of the  
157 lung-specific and thymic precursor subsets.

### 158 **Large-scale shifts in gene expression by MAIT thymocytes**

159 The data demonstrated that MAIT cells from mouse thymus are found in most of the  
160 clusters with peripheral MAIT cells (**Fig. 1B and Extended Figure 1B**). These results,  
161 along with the activation assay results (**Fig. 1G**), confirmed the previously reported  
162 presence of mature, functional MAIT cells in the thymus<sup>9, 10, 16, 21</sup>. It has been reported  
163 that immature thymic CD24<sup>+</sup>CD44<sup>-</sup> stage 1 precursor cells transition to stage 2 (CD24-  
164 CD44-) and give rise to mature CD24<sup>-</sup>CD44<sup>+</sup> MAIT1 and MAIT17 cells<sup>9</sup>. To create an  
165 unbiased model of MAIT cell thymic differentiation that encompasses the different  
166 clusters, we have employed the Monocle 2/DDRtree algorithm<sup>36</sup> to enable pseudo-time

167 ordering based solely on the scRNA-seq of the MAIT cell differentiation stages of  
168 thymus cells (**Fig. 2A, B**). The analysis indicates that relatively immature or precursor  
169 thymic MAIT cells divide into two branches: one leading to MAIT1 thymocytes and  
170 another leading to MAIT17 thymus cells (**Fig. 2B**). Hierarchical clustering of gene  
171 expression of the thymic MAIT cell clusters generated 12 gene modules of genes that  
172 tended to be co-expressed in individual cells along the trajectory (**Fig. 2C and**  
173 **Supplementary Table 2**).

174 Based on the expression of key genes, we could align the gene expression modules  
175 with the stages of MAIT cell maturation derived earlier from flow cytometry and  
176 functional assays. MAIT cells in cluster 6 have high expression of genes in two  
177 modules (6 and 7, precursor modules), which include *Satb1*, *Ccr9*, *Tox*, *Lef1*, *Itm2a*,  
178 *Bcl2* and *Sox4* (**Fig. 2D, Extended Data Fig. 2B, Extended Data Fig. 2C,**  
179 **Supplementary Table 2**). Therefore, this cluster served as the starting point for the  
180 pseudotime analysis. Flow cytometry analyses confirmed co-expression of TOX protein  
181 by cells that co-express typical stage 1 genes, such as CD24 and CCR9 (**Fig. 2E**),  
182 along with the absence of CD44 (data not shown). In addition, CD44<sup>-</sup> cells have the  
183 highest expression of SATB1 and LEF1 on the protein level (**Extended Data Fig. 2D**),  
184 further validating its identity as a group that contains relatively immature thymic MAIT  
185 cells or stage 1 cells. Cells from clusters 2 and 4 lack expression of both *Cd24a*, typical  
186 of the most immature cells and *Cd44*, which marks mature or stage 3 cells (**Extended**  
187 **Data Fig. 2A**) while the pseudotime trajectory indicates they are closer to the precursor  
188 population. Furthermore, several genes from the precursor modules, such as *Lef1* and  
189 *Satb1* (*Id3* not shown), are expressed to some extent by these putative stage 2 MAIT

190 cells (**Fig. 2D, Supplementary Table 2**). Altogether, this suggests that these cell  
191 clusters contain intermediate or stage 2 MAIT cells. These stage 2 MAIT cell clusters  
192 share two gene modules (11 and 12, Stage 2 modules), that include expression of  
193 *Ms4a4b*, *Ms4a6b* and *Ccr7* (**Fig. 2D, Extended Data Fig. 2B and Extended Data Fig.**  
194 **2C, Supplementary Table 2**). These clusters could be distinguished by the expression  
195 of *Cd4* by cluster 2 and *Cd8a*, *Cd8b1*, and *Klrd1* by cluster 4. CD4 expression was  
196 reported to be enriched in stage 1 and stage 2 thymic MAIT cells, while CD8 is  
197 increased in stage 3 MAIT thymocytes<sup>8, 37</sup>. These findings and the single-cell trajectory  
198 analysis suggest that of the two stage 2-like MAIT cell clusters, cluster 4 is more mature  
199 and perhaps closer to MAIT1 cells. Separate groups of CD4 and CD8 $\alpha$  stage 2 MAIT  
200 thymocytes were confirmed by flow cytometry (**Fig 2E**).

201 Stage 3 MAIT1 thymocytes have high expression of gene module 8 including several  
202 natural killer cell receptors, such as *Klrd1* and *Nkg7*, whereas in MAIT17 cells,  
203 expression of genes modules 2, 3 and 9 were increased and included transcripts such  
204 as *Il18r1*, *Lgals3* and *Tmeme176a* (**Fig. 2D, Extended Data Fig. 2B, Extended Data**  
205 **Fig. 2C, Supplementary Table 2**). A recent study<sup>38</sup> provided data indicating that NKT17  
206 cells are generated earlier in the thymus than NKT1 cells, which also seems to be true  
207 for our *in-silico* analysis of thymic MAIT17 and MAIT1 cells, with MAIT17 cells closer to  
208 the precursor stages (**Fig. 2B**). Taken together, these data show that the stages defined  
209 on the basis of the expression of CD24 and CD44 in fact encompass the MAIT cells in  
210 the thymus. When an unbiased analysis is undertaken, that the stage 3 cells are almost  
211 entirely MAIT1 and MAIT 17 cells in C57BL/6 mice, and the stage 2 classification is

212 heterogenous and possibly containing cells with different potentials and/or different  
213 degrees of differentiation.

### 214 **MAIT circulatory and precursor cells**

215 MAIT cells have been reported to be tissue-resident cells in mice<sup>20</sup>. A tissue resident  
216 gene signature was most enriched in the lung cell cluster 3 (**Fig. 3A**). MAIT cells can be  
217 found in the circulation, and they are abundant in human peripheral blood<sup>8</sup>. Using a  
218 gene expression signature score for circulatory mouse CD8<sup>+</sup> T lymphocytes<sup>39</sup>, we found  
219 that peripheral MAIT cells similar to thymus stage 2 cells (clusters 2, 4) and a smaller  
220 population of lung-specific cells (cluster 7) were distinguished by enrichment of  
221 circulatory signature genes (**Fig. 3A**). MAIT cells in these clusters expressed *Ccr7*, *Sell*  
222 (encoding CD62L) and *Lef1* (**Fig. 3B**) and were most prevalent in the spleen, but  
223 detectable in different tissues. (**Fig. 1B**). Cluster 7 circulatory-like MAIT cells also  
224 exhibited expression of some tissue-resident genes, unlike clusters 2 and 4.  
225 Importantly, cells in all three of these putative circulatory MAIT cell clusters, even those  
226 in the periphery, had relatively low expression of mRNA encoding *Cd44*, *Rorc* and  
227 *Tbx21* (**Fig, 3B**), suggesting they could be less mature and more similar to stage 2  
228 MAIT thymocytes. We refer to these relatively immature cells with enriched circulatory  
229 gene expression signature as circulatory/precursors (MAIT<sub>CP</sub>). We applied Monocle  
230 analysis to the scRNA-seq data to perform pseudotime trajectory analysis of spleen and  
231 lung MAIT cells. Consistent with our designation, in spleen, cluster 2 is at the root of the  
232 trajectory (**Fig. 3C and Supplementary Table 3**) whereas in lung the root of the  
233 trajectory consists mainly of cells from cluster 7 (**Fig. 3D and Supplementary Table 4**).

234 Cells in clusters 2, 4 and 7 also express increased amounts of genes encoding  
235 ribosomal proteins (**Extended data Fig. 3A**), suggestive of proliferative capacity. By  
236 flow cytometry, we confirmed that MAIT cells expressing CD62L were most abundant in  
237 the spleen, especially in CD8<sup>+</sup> MAIT cells (**Fig. 3E**) and they are also prevalent in the  
238 blood (**Extended Data Fig. 3B**), in accord with the hypothesis that they circulate  
239 through the vasculature. The spleen trajectory indicates that the cluster 4 cells are  
240 slightly more mature than those in cluster 2, which fits with the thymus trajectory  
241 analysis (**Fig. 2B**), while MAIT17b cells lacking Syndecan-1 were more mature than  
242 MAIT17a (cluster 0) (Fig.3C).

243 The presence of perhaps relatively immature MAIT<sub>CP</sub> cells in the periphery led us to  
244 identify MAIT cells that might be recent thymic emigrants (RTEs). We used transgenic  
245 mice that express green fluorescent protein (GFP) under the control of the  
246 recombination-activating gene 2 (*Rag2*) promoter (*Rag2:GFP*). In these mice, GFP  
247 expression indicates cells that recently rearranged their TCR genes<sup>40, 41</sup> providing an  
248 indicator of the timing of initiation of TCR expression and maturation. In the *Rag2*  
249 reporter mice, the pattern of CD62L expression by MAIT cells was not altered, with  
250 more expression in spleen (**Fig. 3F**) and blood (**Extended Data Fig. 3C**), a pattern  
251 similar to WT controls. The data showed that a high percentage of MAIT thymocytes in  
252 four-week-old mice expressed the *Rag2* reporter (**Fig. 3F**), suggesting that MAIT cells in  
253 young mice have recently rearranged *Tcra*. The spleen contained a significant number  
254 of MAIT cells with co-expression of CD62L and *Rag2:GFP*, indicating the presence of a  
255 relatively immature, peripheral population, while lung and liver had a lower number of  
256 these cells.



257 An earlier report showed that CCR7<sup>+</sup> iNKT cell precursors<sup>42</sup>, which also expressed  
258 LEF1, egress from the thymus and undergo final maturation in the periphery. Some of  
259 the thymic MAIT cells also expressed CCR7, and they are mostly RAG2:GFP<sup>+</sup>. The  
260 spleen also contained a significant proportion of GFP<sup>+</sup> MAIT cells, which were  
261 predominantly CCR7<sup>+</sup> (**Extended Data Fig. 3D**) consistent with the hypothesis that  
262 MAIT cell RTEs are most prevalent there. Expression of LEF1 was higher on CD62L<sup>+</sup>  
263 thymic MAIT cells as compared to their more mature, CD44<sup>+</sup> MAIT cell counterparts  
264 (**Extended Data Fig. 3E**). Furthermore, the thymus had the highest percentage of  
265 LEF1<sup>+</sup> MAIT cells as compared to peripheral MAIT cells (**Extended data Fig. 3F**).  
266 Overall, expression of the RAG2 reporter, CCR7, CD62L were correlated in the thymus  
267 and spleen. The data therefore are consistent with a model in which cell types similar to  
268 stage 2 MAIT thymocytes are in RTE that circulate in the blood and are in the spleen.  
269 We therefore propose that MAIT<sub>CP</sub> are circulatory MAIT cells that are precursors for  
270 cells that further differentiate in the periphery.

### 271 **Mouse MAIT17 cells are metabolically active**

272 Following activation and differentiation, CD4<sup>+</sup> and CD8<sup>+</sup> T cells profoundly change their  
273 cellular metabolism. Effector-like as opposed to memory-like and tissue-resident states  
274 are controlled by divergent metabolic programs, relying on glycolytic versus  
275 mitochondrial or fatty acid oxidation metabolism, respectively<sup>31</sup>. Analysis of the scRNA-  
276 seq signature scores for oxidative phosphorylation, mitochondrial genes, fatty acid  
277 metabolism and glycolysis showed that MAIT17 clusters had the most enrichment for  
278 oxidative phosphorylation genes, with the least expression in MAIT<sub>CP</sub>. (**Extended Data**

279 **Fig. 4A).** To further analyze the metabolism of heterogeneous MAIT cells based on  
280 scRNA-seq, we used the Compass algorithm<sup>43</sup>, which computes the analysis of  
281 variance (ANOVA) for each reaction in different metabolic pathways. We selected the  
282 reactions labeled by the Recon2 database<sup>44</sup> as involved in glycolysis/gluconeogenesis,  
283 citric acid cycle, fatty acid oxidation or amino acid metabolism pathways. When  
284 compared to the thymocyte precursors (cluster 6), MAIT17 clusters showed the highest  
285 Cohen's D score for each pathway, followed by MAIT1, with lower Cohen's D scores in  
286 the MAIT cell lung tissue-resident cluster 3 and MAIT<sub>CP</sub> (**Extended Data Fig. 4B and**  
287 **Supplementary Table 5**). This analysis is therefore consistent with the gene signatures  
288 in showing a higher metabolic pathway expression in MAIT17 cells versus reduced  
289 metabolism in MAIT1 and MAIT<sub>CP</sub>.

290 Because transcriptomic data do not always accurately reflect metabolic activity, we  
291 measured MAIT cell metabolic parameters by flow cytometry to validate these findings.  
292 We quantified the uptake of fatty acids and glucose, the cytoplasmic lipid droplet  
293 content, and the activity of mitochondria with membrane-potential sensitive MitoTracker  
294 Deep Red FM, which accumulates in active mitochondria. Large differences were  
295 evident during the differentiation of total MAIT cells in thymus, with stages 1 and 2 cells,  
296 gated as in **Extended Data Fig. 5a**, significantly less active metabolically compared to  
297 stage 3 for all measures. The predominant mature MAIT cells in the thymus are MAIT17  
298 cells, and compared to MAIT1 cells, MAIT17 thymocytes showed higher levels for all the  
299 metabolic parameters, except glucose uptake (**Fig 4A and 4B**). Consistent with  
300 metabolic reaction modeling, MAIT<sub>CP</sub> were significantly less active than MAIT17 and in

301 that regard comparable to MAIT1 cells. These data indicate that thymic MAIT17 cells  
302 adopt a distinctly active metabolic phenotype during functional differentiation.

303 We compared peripheral mouse MAIT cells to CD8<sup>+</sup> naïve, central memory (CM) and  
304 effector memory (EM) T cells, gated as in **Extended Data Fig 5A**. As in the thymus,  
305 there was heterogeneity comparing subsets: MAIT17 cells in all sites had significantly  
306 elevated uptake of fatty acids, lipid content, and mitochondrial potential compared to  
307 MAIT1, MAIT<sub>CP</sub> or the CD8<sup>+</sup> memory T cell subsets (**Figure 4C-H**). In contrast, a time  
308 course analysis showed that MAIT1 cells have higher glucose uptake compared to  
309 MAIT17 cells in liver and spleen, although this was not reflected in the scRNA-seq data  
310 (**Extended Data Fig. 5B**). Regardless, these data suggest that all MAIT cells engage in  
311 fatty acid uptake, fat storage and mitochondrial membrane polarization, suggesting they  
312 may depend on mitochondrial respiration to generate ATP. However, our data suggest  
313 that MAIT1 cells support the generation of ATP through consumption of glucose, while  
314 MAIT17 cells preferentially metabolize fatty acids. Importantly, peripheral MAIT<sub>CP</sub>  
315 closely mirrored the metabolic program of their CD62L<sup>+</sup> thymic counterparts. Together,  
316 this suggests that adoption of differential metabolic program by MAIT17 cells occurs in  
317 thymic MAIT subsets and depends on the functional differentiation they undergo in the  
318 thymus or periphery rather than their ultimate tissue localization.

### 319 **Heterogeneity of human MAIT cells**

320 In order to determine the extent of human MAIT cell heterogeneity and to assess the  
321 homology of human and mouse MAIT cell subsets, we carried out scRNA-seq of sorted  
322 human MAIT cells from thymus, peripheral blood and lung. Thymus tissues were

323 obtained from children undergoing partial thymectomy due to cardiac surgery. Lung and  
324 peripheral blood were obtained from the same adult donors, undergoing surgery for  
325 early-stage lung cancer<sup>45</sup>. MAIT cells were identified as V $\alpha$ 7.2<sup>+</sup>, human MR1 5-OP-RU  
326 tetramer<sup>+</sup> cells as shown in **Extended Data Fig. 6A**. Human MAIT cells were also  
327 heterogenous (**Fig. 5A and Fig. 5B and Supplementary Table 6**) and most MAIT cell  
328 clusters were highly tissue-specific (**Extended Data Fig. 6B**). Importantly,  
329 demultiplexing analysis indicated that the clusters contained cells from multiple donors  
330 (**Extended Data Fig. 6C**). There were multiple thymus-specific clusters (**Fig. 5B and**  
331 **Extended Data Fig. 6B**) and one nearly completely lung specific subset (cluster 4).  
332 Cluster 0 consisted mostly of cells from PBMCs and these cells expressed MAIT1 cell  
333 genes such as *NCR3*, *KLRB1* and *GZMK* (**Fig. 5C**). Like PMBCs, most clusters from  
334 lung and cluster 2 from thymus showed enrichment of MAIT1 signature score. In  
335 addition to cluster 4, clusters 3 and 5 were also enriched for lung MAIT cells, and these  
336 clusters were enriched for MAIT17 signature score, although this did not exclude co-  
337 expression of MAIT1 genes (**Fig. 5D**). Similar to the mouse, however, MAIT cells in  
338 these lung MAIT cell clusters were enriched for a tissue-residency signature gene,  
339 whereas a circulatory gene expression signature was detected in MAIT cells from  
340 PBMCs (**Fig. 5D**). Previous work showed lung lymphocytes from mice also had  
341 increased expression of genes associated with activation, such as members of the  
342 *NFKB* and *AP1* families<sup>46</sup>. Human lung MAIT cells also showed increased expression of  
343 genes associated with activation, including *TNFAIP3* and *FOS* (**Fig. 5C**).  
344 Clusters from the thymus provide evidence for differentiation from immature cells  
345 leading to a mature MAIT1 cell population (cluster 2). The most immature cluster,

346 cluster 6 or here called MAIT0 cells, expressed genes such as *RAG1*, *RAG2*, *PTCRA*,  
347 *LEF1*, *CD1E* and *CD1B* (**Fig. 5C**). This agrees with an earlier report using bulk RNA-  
348 sequencing of human MAIT thymocytes<sup>10</sup>, MAIT cells in this cluster appear to be even  
349 less mature than typical mouse thymus stage 1 cells. Cluster 9 MAIT cells expressed  
350 *CCR9*, *LEF1*, *ITM2A*, *SATB1* and *TOX* (**Fig. 5C**) while lacking the expression of *CD27*  
351 and *KLRB1* (encoding CD161) (**Extended Data Figure 6D**), and therefore are similar to  
352 the previously defined stage 1 cells. To investigate the gene expression dynamics  
353 underlying the human MAIT cell differentiation program, we created a pseudo-time  
354 ordering for thymus MAIT cell transcriptomes (**Fig. 5E**). This analysis allowed definition  
355 of modules of genes that were co-expressed for each cluster (**Fig. 5F and**  
356 **Supplementary Table 7**). The analysis revealed a precursor gene module (module 2)  
357 found in immature cell clusters 6 and 9 (**Fig. 5G and Extended Data Figure 7A**). There  
358 are also MAIT1 gene modules (4 and 5), characterized by increased expression of  
359 genes such as *NKG7* and genes encoding granzymes (**Fig. 5G, Extended Data Figure**  
360 **7A and 7B**). Pseudotime analysis suggests that cluster 6 containing the Stage 0 cells  
361 gives rise to cluster 9, an intermediate transcriptional state (stage 1), which further  
362 differentiates into a stage 2-like cells (cluster 12) with *CD27* expression. This cluster  
363 then branches into stage 3-like cells (cluster 2) that express *KLRB1*. A separate branch  
364 can give rise to cluster 1, enriched in gene modules 3 and 7. This MAIT cell cluster has  
365 higher expression of circulatory or precursor transcripts, such as *LEF1* and *CCR7* (**Fig.**  
366 **5G, Extended Data Figure 7A and 7B**), and also *LRRN3*, which is co-expressed with  
367 *LEF1* and *CCR7* and marks naïve human T cells<sup>47</sup>. These data are consistent with the  
368 notion that this group of human MAIT cell clusters are not fully differentiated and similar

369 to mouse stage 2 thymocytes and MAIT<sub>CP</sub>, although their differentiation potential is  
370 unknown.

371

### 372 **Human MAIT cells have increased fatty acid uptake and storage**

373 We calculated metabolic signature scores for the transcriptomes of human MAIT cell  
374 clusters (**Extended Data Fig. 8A**). We also functionally tested the metabolic activity of  
375 human circulatory (blood) and tissue (lung) MAIT cells and compared them to naïve,  
376 effector and memory CD8<sup>+</sup> T cell populations (gated as in **Extended Data Fig. 8B**). As  
377 expected, our data indicate that the CD8<sup>+</sup> memory T cell subsets were higher for their  
378 metabolic readouts compared to naïve or effector T lymphocytes (**Fig. 6A-6D**), which  
379 agrees with previous research<sup>48</sup>. As reported previously<sup>49</sup>, the CD8<sup>+</sup>CD103<sup>+</sup> subset, a  
380 phenotype of tissue-resident memory T cells (TRM), had the most enhanced fatty acid  
381 uptake. We also analyzed MAIT cell phenotypic subsets, including the largest  
382 population of MAIT cells (CD103<sup>-</sup>, CD161<sup>+</sup>), and a smaller population of CD103<sup>-</sup>,  
383 CD161<sup>-</sup> MAIT cells. In human lung there also was a population of CD103<sup>+</sup>, CD161<sup>+</sup>  
384 MAIT cells (**Extended Data Fig. 8B**). The human MAIT cell subsets had a larger  
385 reservoir of stored lipids and also actively took up high amounts of fatty acids,  
386 comparable to TRM cells and even greater than central and effector memory cells (**Fig.**  
387 **6A-6D**). In contrast, the mitochondrial potential was low in all MAIT cell subsets, and  
388 was not significantly different from naïve or effector T cells. Therefore, the human MAIT  
389 cell metabolic parameters were not restricted to a phenotypic subset or to lung as  
390 opposed to PMBCs (**Fig. 6A-6D**), they resembled mouse MAIT17 cells in their high lipid

391 stores and substantial uptake of fatty acids, did not have a higher mitochondrial  
392 potential, and therefore more similar in that regard to MAIT1 and MAIT<sub>CP</sub>.

393

### 394 **Homology of human and mouse MAIT cell populations**

395 To evaluate the similarities in the transcriptional signatures of human and mouse MAIT  
396 cell subsets, we performed integration of the human and mouse dataset<sup>50</sup>. Post-  
397 integration, 14 integrated MAIT cell clusters were identified, including some that were  
398 tissue specific (**Fig. 7A**). Several clusters contained MAIT cells from both species  
399 (**Fig. 7B** and **Extended Data Fig. 8C**). This is particularly true for MAIT cell precursors  
400 in the thymus. MAIT cells in integrated or *i*-cluster 5 consisted of cells from precursors  
401 including mouse MAIT cluster 6 and human MAIT cluster 9 (**Extended Data Fig. 8C**)  
402 with expression of *ITM2A*, *CCR9* and *TOX* and other genes characteristic of thymus  
403 differentiation (**Fig. 7C** and **Extended Data Fig. 9A**). Cells in *i*-cluster 0 contained  
404 mouse and human MAIT thymocytes and also mouse spleen cells. These MAIT cells  
405 have a circulatory gene expression signature, including *SELL* and *IGFP4* (**Fig. 7C** and  
406 **Extended Data Fig. 9A**), characteristic of MAIT<sub>CP</sub> (**Fig 1D**), indicating similarity  
407 between thymus stage 2 MAIT cell transcriptome is similar between the two species.  
408 Thymic MAIT cell subsets, however, did not completely overlap, as *i*-cluster 12  
409 contained only stage 0 human MAIT thymocytes expressing *RAG1* and *RAG2* were not  
410 found in mice (**Fig. 7C** and **Extended Data Fig. 9A**).

411 Other MAIT cell clusters contained cells from both species, but the representation of  
412 mouse versus human cells was highly unbalanced. For example, cells in *i*-cluster 3

413 expressed genes typical of MAIT1 cells, and were prevalent in mouse liver and spleen,  
414 but represented to a much lesser extent in human PBMCs (**Fig. 7C and Extended**  
415 **Data Fig. 9A**). Integrated *i*-cluster 1 had a MAIT17 signature, including expression of  
416 *TMEM176A* and *IL18R1*, with mouse cells from different organs and only a few human  
417 cells, consistent with the prevalence of MAIT17 cells in mice (**Fig. 7C and Extended**  
418 **Data Fig. 9A**). Mouse lung MAIT cells not only had a unique transcriptome compared to  
419 mouse MAIT cells from other sites, but human and mouse lung cells did not cluster  
420 together. Integrated *i*-cluster 2 consisted of lung mouse MAIT cells, but only a few  
421 human lung MAIT cells were present, demonstrating that the lung gene expression  
422 signature varies between the two species.

423 The divergent transcriptional signatures in peripheral MAIT cells might reflect genetic  
424 and/or environmental differences between the two species. To further understand how  
425 environment can affect the properties of MAIT cells, we have studied outbred mice  
426 from pet stores, so-called dirty mice, and neonatal SPF mice cross-fostered with pet  
427 store mothers. The number of lung MAIT cells was not greatly increased by exposure  
428 to the non-SPF flora (**Extended Fig. 9B, 9C**). We found alterations in MAIT cell  
429 phenotype that were environment-dependent, however, and likely related to the  
430 microflora. Pet store mice had fewer SCD1<sup>+</sup> MAIT cells in the lung (**Fig. 7D, Extended**  
431 **Fig. 9B**), a marker of mature MAIT17 cells. The differences were more apparent,  
432 however, when cross-fostered C57BL/6 mice were included in the comparison, which  
433 eliminated a role for genetic differences (**Fig. 7D, Extended Fig. 9B**). Cross-fostered  
434 mice also had a reduction in SDC1<sup>+</sup> lung MAIT cells, but also had reduced expression  
435 of ROR $\gamma$ t and increased percentages of KLRG1<sup>+</sup> and T-bet<sup>+</sup> lung MAIT cells, a sign of



436 enhanced MAIT1 cell function (**Fig. 7D, Extended Fig. 9B**). These data suggest that  
437 removal from SPF conditions increases the prevalence of MAIT1 at the expense of  
438 MAIT17 cells.

439

440

441 **Discussion**

442

443 Here we have used a combination of scRNA-seq, phenotypic and metabolic analyses to  
444 characterize the heterogeneity of MAIT cell subsets from different tissues and the  
445 conservation of these subsets between mouse and human. Our data revealed the  
446 presence of a subset of circulatory MAIT cells that in the mouse includes recent thymic  
447 emigrants. Furthermore, transcriptomic and measurement of metabolic parameters  
448 indicated that mature MAIT cells, even those in the thymus, had a metabolic state highly  
449 different from naïve CD8<sup>+</sup> T cells, but only partially similar to subsets of memory CD8<sup>+</sup> T  
450 cells in mouse and human. Additionally, the metabolic state of mouse MAIT1 and  
451 MAIT17 cells was strikingly different. While some subsets of mouse and human MAIT  
452 cells defined by scRNA-seq were well-represented and conserved between species,  
453 particularly in the thymus, other peripheral MAIT cell subpopulations had major  
454 quantitative and qualitative differences between mouse and human, that could reflect in  
455 part environmental influences.

456

457 In the thymus, we identified multiple subsets of mouse and human MAIT cells, including  
458 both precursors unique to the thymus as well as clusters of mature MAIT thymocytes  
459 that also were present in the periphery. When we analyzed the mouse thymus stages  
460 by single-cell trajectory analysis, we generated a model in which mouse precursors  
461 mature into stage 2-like MAIT cells and then diverge into distinct MAIT1 and MAIT17  
462 subsets, with MAIT17 cells predominant. The finding of mature thymic MAIT1 and  
463 MAIT17 subsets agrees with several others<sup>9, 10, 16, 21</sup>, but here we also showed that  
464 maturation from stages 1-3 is accompanied by corresponding changes in metabolic

465 parameters, with stage 3 cells more similar to peripheral MAIT cells. Unlike another  
466 report<sup>22</sup>, however, we did not find evidence for MAIT2 cells, which may reflect the  
467 difference between C57BL/6 and BALB/c strain mice. Our data suggest that MAIT cells  
468 with a stage 2-like phenotype, some that are CCR7<sup>+</sup>, also are found in the blood and  
469 spleen. Therefore, the data are consistent with a model in which partially mature MAIT  
470 cells are exported from the thymus, while other cells retained in the thymus attain a  
471 more mature or stage 3 state, similar to a current model for iNKT cell differentiation<sup>42</sup>.  
472 We speculate that it provides a strong advantage for the host to have MAIT subsets that  
473 can readily differentiate on-demand in the periphery in response to an infection.

474

475 The evidence indicates human thymus MAIT cells differentiate from precursors mostly  
476 into a MAIT1 cell population. In agreement with an earlier study<sup>10</sup>, an early MAIT cell  
477 subset (human cluster 6) with cells expressing *RAG1* and *RAG2* found in humans was  
478 absent in the mouse thymus. This might reflect differences in the kinetics of  
479 differentiation, for example, the transition from the most immature stage (human cluster  
480 6) might be slower in the human compared to the mouse thymus. In addition to  
481 progressing into MAIT1 cells, the pseudotime analysis suggests some human MAIT  
482 thymus precursors differentiate to cells that expressed CCR7 and have other features  
483 similar to mouse stage 2 MAIT thymocytes (Fig. 5). The analysis could not determine,  
484 however, if these cells differentiate further. Additionally, a population of human thymus  
485 MAIT17 cells was not detected.

486

487 Overall, our data show that populations of mouse and human MAIT cells have metabolic  
488 features that distinguish them from naïve CD8<sup>+</sup> T lymphocytes. The predominant mouse  
489 MAIT17 cell subset had a highly active metabolism characterized by fatty acid uptake  
490 and storage and mitochondrial activity, while MAIT1 cells were more active in glucose  
491 uptake. This metabolic difference was correlated with their function and was observed  
492 across tissues, including in the thymus. Similar findings were recently reported when  $\gamma\delta$   
493 T cells that produce IFN $\gamma$  were compared to those that produce IL-17, highlighting  
494 similarities between populations of innate-like T lymphocytes<sup>51</sup>. As for the  
495 transcriptomes, subsets of human MAIT cells from lung and blood were not greatly  
496 different from one another, nor could they be divided into subgroups by surface  
497 phenotype. Instead, the human MAIT cell subsets shared similar metabolic features,  
498 most comparable to tissue-resident CD8<sup>+</sup> memory T cells for uptake and storage of fatty  
499 acids but with a reduced mitochondrial potential. Interestingly, this metabolic phenotype  
500 resembles the controlled activation state of epithelial-resident T cells<sup>52</sup>. A previous study  
501 also showed generally low mitochondrial activity in bulk MAIT cells from PBMCs, with  
502 an ability to rapidly reactivate metabolic and effector pathways upon stimulation<sup>53</sup>.  
503 Increased mitochondrial potential and activity was functionally linked to increased IL-17  
504 production by human MAIT cells<sup>54</sup> consistent with a connection between mitochondrial  
505 activity, IL-17 production by MAIT cells and the different metabolic state of mouse  
506 MAIT17 cells.

507

508 Increased production of IL-17 by human MAIT cells has been observed in several  
509 contexts, including children with community-acquired pneumonia<sup>27</sup>. In multiple studies,

510 however, the proportion that produced IL-17 was much lower than the frequency of  
511 those producing IFN $\gamma$ , and it is uncertain if there is a true MAIT17 subset, as opposed to  
512 more flexible or polyfunctional cells that also had the capability to produce IFN $\gamma$ . Some  
513 human MAIT cells with an IL-17 gene expression signature were present in lung, but the  
514 MAIT1 gene expression signature was present in MAIT cells in these clusters as well.  
515 All considered, including the data from the thymus, we conclude that an intrinsic, highly  
516 specialized MAIT17 subset either is absent or very rare in humans.

517 There is evidence that obesity and metabolic alterations can alter MAIT cell function.  
518 This has not only been observed in mice<sup>55</sup>, but also there was increased MAIT cell  
519 production of IL-17 by MAIT cells from obese individuals<sup>54, 56</sup>, although IFN $\gamma$ -producing  
520 cells remained more numerous. Furthermore, supplementation with the TCA metabolite  
521 alpha-ketoglutarate augmented human MAIT cell effector capacity<sup>56</sup> providing a further  
522 connection between metabolism and MAIT cell function. These data suggest there is a  
523 causal link between metabolism and MAIT cell function, although further studies will be  
524 required to establish this.

525 MAIT cell specificity is highly conserved and therefore we examined the extent to which  
526 the transcriptomes of MAIT cells were also conserved. The data reveal the most  
527 similarity between differentiating human and mouse MAIT cells in the thymus. Even in  
528 peripheral MAIT cells, some homologous genes were regulated similarly in the two  
529 species, especially for MAIT1 cells. Furthermore, strong tissue differences were  
530 observed. For example, lung MAIT cells in both species were different from their  
531 counterparts in other tissues. Mouse and human lung MAIT cells did not align well,

532 however, in the integration analysis, nor did the transcriptome of mouse spleen MAIT1  
533 cells align with human MAIT1 cells from PMBC.

534 Undoubtedly, genetic differences between mice and humans influence the frequency  
535 and function of the MAIT cell population, but it is also possible that the highly controlled,  
536 standard SPF conditions of laboratory mouse housing have an influence as well.  
537 Exposure to the intestinal microbiome is not only necessary for MAIT cell thymic  
538 development<sup>57</sup>, but also differences in the microbiome can influence the number and  
539 function of skin MAIT cells<sup>57</sup>. Our data indicate that exposure to a less controlled  
540 environment increased cells with a MAIT1 phenotype and decreased MAIT17 cells. It  
541 remains to be determined the extent to which differences between mouse and human  
542 MAIT cell transcriptomes, and ultimately function, can be attributed to differences in  
543 microbial exposure as opposed to other environmental factors and genetic differences.

544

545

546 **MATERIALS AND METHODS**

547

548 **Animals**

549 Inbred mice were bred and housed under specific pathogen-free conditions in the  
550 vivarium of the La Jolla Institute for Immunology (La Jolla, CA). C57BL/6J mice were  
551 purchased from Jackson laboratories. Rag2:GFP mice were obtained from Dr. Pamela  
552 Fink at University of Washington. Female mice were used and they were 6–12 weeks  
553 old, unless indicated otherwise. Pet shop mice were analyzed immediately after  
554 purchase or housed in a vivarium maintained by the University of California, San Diego.  
555 We used SPF (specific pathogen free) C57BL/6 mice of similar weight as controls  
556 because the precise age of pet store mice was unknown. For cross-fostering, breeding  
557 pairs of SPF B6 mice and pet shop mice were simultaneously set up when individual  
558 mice reached approximately 6 weeks of age. SPF B6 pups born within 48 h were used  
559 for cross-fostering. After the birth of both SPF B6 and pet shot litters, the pet shop litters  
560 were removed and replaced with similar numbers of pups from the SPF B6 litters. Litters  
561 from SPF B6 breeders were then nursed by pet shop mothers until weaning. Cross-  
562 fostered male and female mice were analyzed when they were approximately 8 weeks  
563 of age. All procedures were approved by the La Jolla Institute for Immunology or  
564 University of California San Diego Animal Care and Use Committee and are compliant  
565 with the ARRIVE standards.

566

567 **Antibodies and tetramers**

568 Mouse and human MR1 tetramers loaded with either 5-OP-RU or 6-FP were obtained  
569 from the NIH Tetramer Core Facility. Fluorochrome-conjugated monoclonal antibodies  
570 were purchased from eBioscience, BD Bioscience, or BioLegend. Antibodies with clone  
571 indicated in parentheses: anti-mouse CD45 (30-F11); anti-mouse IgD (clone 11-26c.2a);  
572 anti-mouse  $\gamma\delta$  TCR (clone GL3); anti-mouse CD4 (clone GK1.5 or RM4-5); anti-mouse  
573 CD8 $\alpha$  (clone 53-6.7); anti-mouse CD8 $\beta$  (clone H35-17.2); anti-mouse CD138 (clone  
574 281-2); anti-mouse TOX (clone TXRX10); anti-mouse CD19 (clone 1D3); anti-mouse  
575 CCR9 (clone CW-1.2); anti-mouse CD24 (clone M1/69); rabbit polyclonal anti-mouse  
576 LEF1 (C12A5); anti-mouse SATB1 (clone 14/SATB1); anti-mouse IFN- $\gamma$  (clone  
577 XMG1.2); anti-mouse TNF (clone MP6-XT22); anti-mouse IL-17A (clone TC11-18H10);  
578 anti-mouse CD69 (clone H1.2F3); anti-mouse T-bet (clone O4-46); anti-mouse ROR $\gamma$ T  
579 (clone Q31-378 or B2D); anti-mouse IL-18R1 (clone BG/IL18Ra); anti-mouse CCR7  
580 (clone 4B12); anti-mouse CD11b (clone. M1/70); anti-mouse CD62L (clone MEL-14);  
581 anti-mouse CD45R/B220 (clone RA3-6B2); anti-mouse CD11c (clone N418); anti-  
582 mouse ICOS (clone C398.4A); anti-mouse CXCR3 (clone CXCR3-173); anti-mouse  
583 TCR $\beta$  (clone H57-597), anti-mouse CD44 (clone MI7); anti-mouse KLRG1 (clone 2F1);  
584 anti-human CD3 (clone OKT3); anti-human CD8 (clone RPA-T8); anti-human CD161  
585 (clone HP-3G10); anti-human V $\alpha$ 7.2 (clone 3C10); anti-human CD19 (clone HIB19);  
586 anti-human CCR7 (clone 150503); anti-human CD45RA (clone HI100) and anti-human  
587 CD103 (clone Ber-ACT8).

588

## 589 **Isolation of mouse cells**



590 Splenocytes and thymocytes were harvested by mechanical disruption on 70 µm cell  
591 strainers followed by red blood cell (RBC) lysis and washing with Hank's Balanced Salt  
592 Solution (HBSS) (Gibco) supplemented with 10% FBS. Lung tissue was digested with  
593 STEMCELL spleen dissociation medium, and mechanically dissociated using  
594 GentleMACS Dissociator (Miltenyi). Cells were strained through a 70 µm filter and  
595 washed with HBSS supplemented with 10% FBS followed by RBC lysis. Liver cells were  
596 harvested by mechanical disruption on 70 µm cell strainer followed by 34% Percoll  
597 gradient before RBC lysis and washing.

598

### 599 **Flow cytometry**

600 For staining of cell surface molecules, cells were suspended in staining buffer (PBS, 1%  
601 bovine serum albumin (BSA), and 0.01% NaN<sub>3</sub>) and first stained with using PE- or APC-  
602 conjugated MR1 tetramers at a dilution of 1:300 in staining buffer for 45 minutes at room  
603 temperature followed by surface staining with fluorochrome-conjugated antibody at 0.1–  
604 1 µg/10<sup>7</sup> cells. Cells were stained with Live/Dead Yellow (ThermoFisher) at 1:500 and  
605 Fc receptors were blocked with 2.4G2 antibody at 1:500 and Free Streptavidin at  
606 1:1000 for 15 min at 4°C. After washing, cells were stained with cell surface-specific  
607 antibodies for 30 minutes on ice. For cytokine staining, cells were previously stimulated  
608 with 100 ng/ml of PMA and 1 µg/ml of Ionomycin for 1h at 37°C and then incubated in  
609 GolgiStop and GolgiPlug (both from BD PharMingen) for 2 h at 37°C. For intracellular  
610 staining, cells were fixed with CytoFix (BD) for 20 min, and permeabilized with Perm 1X  
611 solution (ThermoFisher) with intracellular antibodies overnight. For high-parameter flow  
612 cytometry experiments, data were acquired on Fortessa or Symphony S6 (BD

613 Biosciences), data were processed with DIVA (BD Bioscience) and analyzed with  
614 FlowJo v10.7 (BD). Opt-tSNE and UMAP dimensional reduction as well as FlowSOM  
615 algorithm clustering of flow cytometry data was performed in OMIQ software (OMIQ  
616 Inc.).

617

### 618 **Cell enrichment and cell sorting**

619 For MAIT cell enrichment before sorting, negative selection of cells was carried out  
620 using biotinylated antibodies against CD11b (clone M1/70), CD11c (clone M418), F4/80  
621 (clone BM8.1), CD19 (clone 1D3), and TER-119 (clone TER-119). These were used  
622 together with Rapidspheres (STEMCELL Technologies) and either the Big Easy  
623 (STEMCELL Technologies) or Easy eight magnets (STEMCELL Technologies) and  
624 protocols from Stem Cell Technologies. MAIT cells were sorted using a FACSAria III  
625 (BD Biosciences).

626

### 627 **Human tissue and cell preparation**

628 Postnatal human thymus was obtained from children with congenital heart disease  
629 undergoing cardiac surgery at Rady Children's Hospital, San Diego, CA. Only patients  
630 who meet the inclusion criteria and sign informed consent, are included in the study.  
631 Thymus samples are obtained from 2-year-old male, 2-year-old female, two 13-month-  
632 old males and 4-year-old female. Thymus tissue was processed by mechanical  
633 dissociation into a single cell suspension, strained and viable lymphocytes were purified  
634 by Lymphoprep (STEMCELL) density gradient centrifugation before cryopreservation.  
635 For lung and peripheral blood samples, written, informed consent was obtained from all

636 subjects from the Institutional Review Board of La Jolla Institute for Immunology and the  
637 Southampton and South West Hampshire Research Ethics Board. Newly diagnosed,  
638 untreated patients with non-small cell lung cancer were prospectively recruited once  
639 referred. Freshly resected tumor tissue and, where available, matched adjacent non-  
640 tumor lung tissue was obtained from patients with lung cancer following surgical  
641 resection. Lung tissue was obtained from 76-year-old female, 63-year-old female, 66-  
642 year-old male and 48-year-old male. Tissues were macroscopically dissected and  
643 slowly frozen in 90% FBS (Thermo Fisher Scientific) and 10% DMSO (Sigma) for  
644 storage, until samples could be prepared. Cryopreserved non-tumor lung tissue was  
645 mechanically dissociated and enzymatically digested as previously described<sup>45</sup>. Briefly,  
646 lung tissue was minced with a scalpel and digested enzymatically with 0.15 WU/mL of  
647 D-Liberase (Roche) and 800 U/mL of DNase I (Sigma-Aldrich) for 15 min at 37°C.  
648 Then it was disaggregated into a single-cell suspension by passing it through a 70 µm  
649 strainer and rinsing with cold buffer (1× phosphate-buffered saline (PBS), 2 mM EDTA,  
650 0.5% BSA). PBMCs are either obtained from same patients we obtained lung from or  
651 from healthy donors. PBMCs were isolated using density gradient before  
652 cryopreservation.

### 653 **Metabolic assays**

654 Cytometry-based metabolic assays have been described previously<sup>58</sup>. Briefly, cells were  
655 stained with MitoTracker Deep- Red FM (Life Technologies) at 100 nM concentration,  
656 37 °C, 5 % CO<sub>2</sub> for 30-45 minutes in RPMI1640 (Gibco) containing 5 % FBS. For  
657 glucose uptake measurements, cells were incubated in glucose-free media containing 5

658  $\mu\text{g/ml}$  2-(N-(7-Nitrobenz-2-oxa-1,3-diazol-4-yl)Amino)-2-Deoxyglucose (2-NBDG,  
659 Thermo Fisher) and 2.5% FBS at 37 °C, 5 % CO<sub>2</sub> for 30 minutes, unless indicated  
660 otherwise. For lipid droplet quantification, cells were incubated in media containing 1  
661  $\mu\text{g/ml}$  Bodipy 493/503 (Thermo Fisher) for 30 min. Uptake of fatty acids was quantified  
662 after incubation with 1 $\mu\text{M}$  4,4-Difluoro-5,7-Dimethyl-4-Bora-3a,4a-Diaza-s-Indacene-3-  
663 Hexadecanoic acid (Bodipy-FL C16, Thermo Fisher) at 37 °C, 5 % CO<sub>2</sub> for 30 minutes.  
664 Optimal incubation periods for metabolic dye and metabolite uptake depend on the  
665 tissue and required fluorescence intensity, but only exceeded 45 minutes where  
666 indicated. Data were acquired using Fortessa or LSR II flow cytometers (BD  
667 Biosciences) and analyzed with FlowJo v10.7 software (BD Life Sciences). Metabolic  
668 marker fluorescence intensity depends on the instrument type and laser intensity, and  
669 therefore does not allow inter-experiment comparisons.

## 670 **Single-cell RNA sequencing**

671 Cells were sorted into a low retention 1.5 mL collection tubes containing 500  $\mu\text{L}$  of a  
672 solution of PBS: FBS (1:1) supplemented with RNase inhibitor (1:100). After sorting, ice-  
673 cold PBS was added to make up to a volume of 1.4 mL. Cells were then spun down (5  
674 min, 600  $g$ , 4°C) and the supernatant was carefully aspirated, leaving 5 to 10  $\mu\text{l}$ . The  
675 cell pellet was gently resuspended in 25  $\mu\text{l}$  of resuspension buffer (0.22  $\mu\text{m}$  filtered ice-  
676 cold PBS supplemented with ultra-pure BSA; 0.04%, Sigma-Aldrich). Following that, 33  
677  $\mu\text{l}$  of the cell suspension was transferred to a PCR-tube and single-cell libraries  
678 prepared as per the manufacturer's instructions (10x Genomics). Samples were  
679 processed using 10X v2 chemistry for the mouse dataset and 10X v3 chemistry for the

680 human dataset, as per the manufacturer's recommendations; 11 and 12 cycles were  
681 used for cDNA amplification and library preparation, respectively. Libraries were  
682 quantified and pooled according to equivalent molar concentrations and sequenced on  
683 Illumina HiSeq 2500 or NovaSeq sequencing platform with the following read lengths:  
684 read 1 – 101 cycles; read 2 – 101 cycles; and i7 index - 8 cycles.

### 685 **Single-cell transcriptome analysis**

686 Mouse cell libraries were mapped with Cell Ranger's count pipeline for mm10. Then  
687 multiple libraries were aggregated with the aggr pipeline. Aggregated data were then  
688 imported into the R environment where Seurat<sup>59</sup> (2.1.0) was used to filter and find  
689 clusters. Cells with less than 200 genes and more than 2,500 genes were discarded.  
690 Furthermore, cells with more than 5% UMIs coming from mitochondrial genes were  
691 filtered out. Genes expressed in less than 3 cells were ignored. This resulted in 6,080  
692 cells with 13,503 genes for downstream analyses. The gene expression matrix was then  
693 normalized and scaled. Principal Component Analysis was performed on the scaled  
694 data and, based on the elbow plot, 20 principal components were selected for  
695 clustering, default resolution (0.6) was used and a perplexity of 100 was chosen for the  
696 t-SNE dimensionality reduction. This dataset was further split up into 3 tissue types –  
697 spleen (3145 cells), lung (1313 cells), thymus (535 cells) which were then analyzed  
698 individually using the same steps. For lung - 8 PCs; thymus – 21 PCs and for spleen –  
699 15 PCs were used for clustering.

700 Human cell libraries were mapped with Cell Ranger's count pipeline for reference  
701 GRCh38-1.2.0. Multiple libraries were aggregated with the aggr pipeline. Aggregated

702 data was then imported into the R environment where Seurat (v3.9.9.9008) was used to  
703 filter cells, normalize and find clusters. Cells with less than 200 genes and more than  
704 20,000 UMIs were discarded. Furthermore, cells with more than 15% UMIs coming from  
705 mitochondrial genes were filtered out. Genes expressed in less than 3 cells were  
706 ignored. This resulted in 3,020 cells with 17,626 genes for downstream analyses. The  
707 gene expression matrix was then normalized and scaled using log normalization.  
708 Principal Component Analysis was performed on the scaled data, and based on the  
709 elbow plot, 18 principal components were selected for clustering, default resolution (0.9)  
710 was used. To determine the clusters' enriched genes (markers), Seurat's  
711 FindAllMarkers function was used with test.use = MAST (Adjusted P-value < 0.05 and  
712 |log fold change| > 0.25). For analyzing human thymus, cells (1316) from thymus tissue  
713 type were selected and analyzed using the same steps as listed above. 25 PCs were  
714 used for clustering of the thymus cells.

## 715 **Human-mouse data integration**

716 Single-cell sequencing data from human and mouse MAIT cells was integrated using  
717 Seurat's (3.0.2) alignment method<sup>50</sup>. Briefly, we identified cross-dataset pairs of cells  
718 matching biological states (anchors). These pairs are used to correct technical  
719 differences between conditions. Default parameters were used and the following was  
720 tailored: the first 15 principal components based on the elbow plot; and resolution 0.5  
721 was used to identify the clusters in the integrated data.

## 722 **Signature plots**

723 Signature module scores were calculated with Seurat's AddModuleScore function using  
724 default parameters. This function calculates the average expression levels of a gene set  
725 of interest, subtracted by the aggregated expression of control gene sets, randomly  
726 selected from genes binned by average expression. Gene lists used for MAIT1 and  
727 MAIT17 analysis were obtained from Legoux et al, 2019<sup>21</sup>. Gene lists for tissue resident  
728 memory and circulating signatures were obtained from Milner et al., 2017<sup>39</sup>. Gene lists  
729 for glycolysis was obtained from MSigDB geneset  
730 KEGG\_GLYCOLYSIS\_GLUCCONEOGENESIS. Gene list for oxidative phosphorylation  
731 was obtained from MSigDB geneset HALLMARK\_OXIDATIVE\_PHOSPHORYLATION.  
732 Gene list for Fatty acid metabolism was obtained from MSigDB geneset  
733 KEGG\_FATTY\_ACID\_METABOLISM. Gene list for mitochondrial gene was obtained  
734 from MSigDB geneset MITOCHONDRIAL\_GENE\_EXPRESSION.

### 735 **Single-cell trajectory analysis**

736 A wrapper script from R package SeuratWrappers v0.3.0 was used for Calculating  
737 Trajectories with Monocle3<sup>60</sup> v0.2.3.0. Seurat's object with Seurat clustering and UMAP  
738 coordinates was converted into a Monocle3 object. A single monocle partition was used  
739 for all cells. Monocle3 function learn\_graph was used to fit a principal graph for the  
740 partition used. The cells were then ordered using the function order\_cells, which  
741 calculates where each cell falls in pseudotime. Monocle3 helper function  
742 get\_earliest\_principal\_node was used to specify the root node of the trajectory.  
743 Trajectory UMAPs were plotted using the function plot\_cells with Monocle3 object as  
744 input. The function graph\_test was used to find genes that are differentially expressed

745 on different paths through the trajectory with the option  
746 `neighbor_graph="principal_graph"`. The trajectory-variable genes were then collected  
747 into co-regulated modules using the function `find_gene_modules`. Monocle3's function  
748 `aggregate_gene_expression` was used to calculate aggregate expression of genes in  
749 each module for all the clusters. These module scores were then plotted in a heatmap  
750 using R package `pheatmap` v1.0.12 with options `cluster_rows=TRUE`,  
751 `cluster_cols=TRUE`, `scale="column"`, `clustering_method="ward.D2"`. The modules were  
752 further combined into stages based on their functionality/annotation. Top 10 genes were  
753 selected for each stage with high `morans_I` value calculated by the function `graph_test`  
754 earlier. The Module heatmap was generated using Seurat's function `DoHeatmap`. It  
755 shows scaled average expression for the top 10 genes grouped by cells in each stage.

756

## 757 **Demultiplexing**

758 PLINK (v2.1.4) from Illumina Genome Studio plugins was used to convert and export  
759 Illumina genotype data into PLINK data format. PLINK is again used with the "`--recode`  
760 `vcf`" option to convert PLINK data format to VCF. `snpQC` package<sup>61</sup> was used to detect  
761 low quality SNPs. SNPs failing in >5% of the samples and SNPs with Illumina's gene  
762 call scores <0.2 in <90% of the samples were excluded for downstream analysis. The  
763 alignment files generated by CellRanger count program (v3.1.0) were split by cell  
764 barcode using `samtools` (v1.9)<sup>62</sup>. Each individual cell-specific BAM file was run through  
765 `Freebayes` (v0.9.21)<sup>63</sup> with the SNP array variants as input to catalog matching SNPs  
766 for each cell.



767 The score for each sample-cell barcode pair were calculated as shown in the below  
768 formula:

$$769 \quad S_n = \frac{(G_n + 1)}{(G_{ANY} - G_n + 1)}$$

770 where  $G_n$  is the number of genotype calls for this barcode that match sample n and  
771  $G_{ANY}$  is the total number of genotype calls made for this barcode. Scores for each  
772 sample were then ranked from highest to lowest and the score for the highest-ranking  
773 sample was compared to that of the second highest. If the ratio between these two was  
774 1.3 or greater and at least 300 genotype calls were made for the cell, the sample with  
775 the highest score was assigned.

776

#### 777 **Data analysis using Compass algorithm**

778 Cellular metabolic states were inferred from single cell transcriptomic data and flux  
779 balance analysis using the Compass algorithm<sup>43</sup> v0.9.9.6.3. Briefly, Compass algorithm  
780 was fed with the count matrix from MAIT17 (cluster 0, 5 and 9), MAIT1 (cluster 1),  
781 circulatory (cluster 2, 4 and 7), lung tissue resident (cluster 3) and precursor (cluster 6)  
782 MAIT cells from the mouse scRNA-seq data. This matrix was obtained after performing  
783 single-cell analysis using Seurat. No cell during the Compass analysis was aggregated  
784 into microclusters. The resulting “reaction scores matrix” output was then subjected to  
785 downstream analyses. We selected the reactions labeled by Recon2<sup>44</sup> GSMM as  
786 involved in "Glycolysis/gluconeogenesis", "Citric acid cycle", and "Fatty acid oxidation"  
787 pathways, and for Amino acid metabolism, we used the reactions filtered by Compass  
788 developers. For all the reactions, we included only the ones whose Recon2 confidence  
789 is either 0 or 4 and are annotated with an EC (Enzyme Commission) number, according

790 to the reaction metadata included in the Recon2 database. We kept reactions with  
791 unevaluated confidence (Recon2 confidence score of 0) because some of them were  
792 found to be key reactions in primary metabolic pathways, but excluded the ones that  
793 Recon2 curators explicitly specified to not have direct biochemical support (Recon2  
794 confidence score of 1, 2 and 3), according to Compass developers. To find reactions  
795 with differential potential activity based on Compass predictions, we computed the  
796 analysis of variance (ANOVA) for each reaction of the Compass scores matrix. The  
797 resulting p-values are adjusted with the Benjamini-Hochberg (BH) method and were  
798 added as a new column value as “adjusted p-value”. We defined a reaction as  
799 significantly differentially expressed if the adjusted p-value is smaller than 0.1, same as  
800 the Compass developers. Effect size was further assessed with Cohen’s D statistic,  
801 which is defined as the difference between the sample means over the pooled sample  
802 standard deviation.

803 Let  $n_1$ ,  $\bar{x}_1$ ,  $s_1$  be the number of observations in population 1, the sample mean and  
804 standard deviation of their scores in a given reaction, respectively. (With a similar  
805 notation for population 2). Then

806

807

$$d = \frac{\bar{x}_1 - \bar{x}_2}{s}$$

808 with

809

$$s = \sqrt{\frac{(n_1 - 1)s_1^2 + (n_2 - 1)s_2^2}{n_1 + n_2 - 2}}$$

810

811

812 Paired effect size analysis was performed for different MAIT cell subsets as compared  
813 to precursors of mature MAIT cells. The equation was applied for each paired  
814 comparison. Taking one of the different MAIT cell subsets as population 1 and the  
815 precursors of mature MAIT cells as population 2.

816

## 817 **Statistical Methods**

818 All graphs and statistical analysis were generated using Prism 9 software (GraphPad  
819 Software, San Diego, CA). Data are plotted as mean  $\pm$  standard deviation or mean  $\pm$   
820 standard error of the mean (SEM), and statistical significance was determined by using  
821 unpaired t test. Significance for multiparameter comparisons was determined by one-  
822 way ANOVA with Dunnett's post-test, paired t test or one-way ANOVA with post-hoc  
823 Tukey test.

824

## 825 **Data visualization tool**

826 Visualization web-based platform was constructed using R package Shiny v1.7.1,  
827 customizing it with CSS theme and htmlwidgets. The app was fed with mouse and  
828 human Seurat and Monocle objects, subsetting only the elementary data in order to  
829 optimize memory resources. Plots are constructed in real time using Seurat and  
830 Monocle V3 functions using the single cell data object selected by the user.

831

## 832 **Data and Software Availability**

833 Single-cell RNA sequencing data generated for this study are deposited at the Gene  
834 Expression Omnibus under accession number GSE189485. Data visualization tool is  
835 available at <https://mait.lji.org>

836

### 837 **Code availability**

838 The code developed for the analyses performed in this study is available upon request.

839

840 **Acknowledgement:** We would like to thank Anusha Preethi Ganesan for help with  
841 human lung dissociation protocol and Gina Levi for coordinating receipt of human  
842 thymus samples. We thank the La Jolla Institute (LJI) Flow Cytometry Core for assisting  
843 with cell sorting and sequencing Core for performing scRNA sequencing. Supported by  
844 the US National Institutes of Health grants AI105215, AI71922 and AI137230 to M.K.,  
845 Wellcome Trust grant 210842\_Z\_18\_Z to T.R, NIH grants AI108651 and AI163813 (L.-  
846 F.L) and UCSD Program in Immunology seed grant (L.-F.L and S.M.H). Lung tissue  
847 collection in the UK was supported by funding from the Whittaker fund and iCURE, by  
848 the Wessex Clinical Research Network and the National Institute of Health Research,  
849 UK. We thank Mr. Woo and Mr. Alzetani for access to surgical material, Dr. Serena  
850 Chee, Ben Johnson, Alice Appleford and Sophie Matthew for collection, processing and  
851 storage of the tissues.

852 Utilized equipment was supported by the NIH grants no. S10RR027366 (BD FACSAria  
853 II), S10OD025052(NovaSeq 6000) and no. S10-OD016262 (Illumina HiSeq 2500).

854

### 855 **Author contributions**

856 S.C., G.A, T. R., S.M.H., L.-F.L., and M.K. designed the experiments, which were  
857 performed by S.C., G.A, T. R., G.S., H.S., M.P.M., G.Y.S. and C.H.L. Data analysis  
858 was performed by S.C., G.A, T. R., A.S., C.R., V.C.C. A.L.R.P. and J.G. Human thymus  
859 samples were provided by J.L., R.M. and J.N. in collaboration with H.C. Thymus  
860 samples were processed by G.V. and Y.L. Human lung samples were provided by C.O.  
861 in collaboration with P.V. Manuscript was written by S.C., G.A., T.R. and M.K. with  
862 editing by H.C., C.O., S.M.H., L.-F.L., and P.V. All authors reviewed the manuscript.  
863

## 864 References

- 865 1. Treiner, E. *et al.* Mucosal-associated invariant T (MAIT) cells: an evolutionarily conserved  
866 T cell subset. *Microbes Infect* **7**, 552-559 (2005).  
867
- 868 2. Kjer-Nielsen, L. *et al.* MR1 presents microbial vitamin B metabolites to MAIT cells.  
869 *Nature* **491**, 717-723 (2012).  
870
- 871 3. Tilloy, F. *et al.* An invariant T cell receptor alpha chain defines a novel TAP-independent  
872 major histocompatibility complex class Ib-restricted alpha/beta T cell subpopulation in  
873 mammals. *J Exp Med* **189**, 1907-1921 (1999).  
874
- 875 4. Treiner, E. *et al.* Selection of evolutionarily conserved mucosal-associated invariant T  
876 cells by MR1. *Nature* **422**, 164-169 (2003).  
877
- 878 5. Gold, M.C. *et al.* Human mucosal associated invariant T cells detect bacterially infected  
879 cells. *PLoS Biol* **8**, e1000407 (2010).  
880
- 881 6. Le Bourhis, L. *et al.* Antimicrobial activity of mucosal-associated invariant T cells. *Nat*  
882 *Immunol* **11**, 701-708 (2010).  
883
- 884 7. Corbett, A.J. *et al.* T-cell activation by transitory neo-antigens derived from distinct  
885 microbial pathways. *Nature* **509**, 361-365 (2014).  
886
- 887 8. Rahimpour, A. *et al.* Identification of phenotypically and functionally heterogeneous  
888 mouse mucosal-associated invariant T cells using MR1 tetramers. *J Exp Med* **212**, 1095-  
889 1108 (2015).  
890
- 891 9. Koay, H.F. *et al.* A three-stage intrathymic development pathway for the mucosal-  
892 associated invariant T cell lineage. *Nat Immunol* **17**, 1300-1311 (2016).  
893
- 894 10. Koay, H.F. *et al.* A divergent transcriptional landscape underpins the development and  
895 functional branching of MAIT cells. *Sci Immunol* **4** (2019).  
896
- 897 11. Gapin, L. Check MAIT. *J Immunol* **192**, 4475-4480 (2014).  
898
- 899 12. Chandra, S. & Kronenberg, M. Activation and Function of iNKT and MAIT Cells. *Adv*  
900 *Immunol* **127**, 145-201 (2015).  
901
- 902 13. Legoux, F., Salou, M. & Lantz, O. MAIT Cell Development and Functions: the Microbial  
903 Connection. *Immunity* **53**, 710-723 (2020).  
904
- 905 14. Xiao, X. & Cai, J. Mucosal-Associated Invariant T Cells: New Insights into Antigen  
906 Recognition and Activation. *Front Immunol* **8**, 1540 (2017).

- 907  
908 15. Hinks, T.S.C. & Zhang, X.W. MAIT Cell Activation and Functions. *Front Immunol* **11**, 1014  
909 (2020).  
910  
911 16. Koay, H.F., Godfrey, D.I. & Pellicci, D.G. Development of mucosal-associated invariant T  
912 cells. *Immunol Cell Biol* **96**, 598-606 (2018).  
913  
914 17. Seach, N. *et al.* Double-positive thymocytes select mucosal-associated invariant T cells. *J*  
915 *Immunol* **191**, 6002-6009 (2013).  
916  
917 18. Pellicci, D.G., Koay, H.F. & Berzins, S.P. Thymic development of unconventional T cells:  
918 how NKT cells, MAIT cells and gammadelta T cells emerge. *Nat Rev Immunol* **20**, 756-770  
919 (2020).  
920  
921 19. Garner, L.C., Klenerman, P. & Provine, N.M. Insights Into Mucosal-Associated Invariant T  
922 Cell Biology From Studies of Invariant Natural Killer T Cells. *Front Immunol* **9**, 1478  
923 (2018).  
924  
925 20. Salou, M. *et al.* A common transcriptomic program acquired in the thymus defines tissue  
926 residency of MAIT and NKT subsets. *J Exp Med* **216**, 133-151 (2019).  
927  
928 21. Legoux, F. *et al.* Molecular mechanisms of lineage decisions in metabolite-specific T  
929 cells. *Nat Immunol* **20**, 1244-1255 (2019).  
930  
931 22. Lee, M. *et al.* Single-cell RNA sequencing identifies shared differentiation paths of  
932 mouse thymic innate T cells. *Nat Commun* **11**, 4367 (2020).  
933  
934 23. Drashansky, T.T. *et al.* BCL11B is positioned upstream of PLZF and RORgammat to  
935 control thymic development of mucosal-associated invariant T cells and MAIT17  
936 program. *iScience* **24**, 102307 (2021).  
937  
938 24. Koay, H.F. *et al.* Diverse MR1-restricted T cells in mice and humans. *Nat Commun* **10**,  
939 2243 (2019).  
940  
941 25. Godfrey, D.I., Koay, H.F., McCluskey, J. & Gherardin, N.A. The biology and functional  
942 importance of MAIT cells. *Nat Immunol* **20**, 1110-1128 (2019).  
943  
944 26. Dusseaux, M. *et al.* Human MAIT cells are xenobiotic-resistant, tissue-targeted, CD161hi  
945 IL-17-secreting T cells. *Blood* **117**, 1250-1259 (2011).  
946  
947 27. Lu, B. *et al.* IL-17 production by tissue-resident MAIT cells is locally induced in children  
948 with pneumonia. *Mucosal Immunol* **13**, 824-835 (2020).  
949

- 950 28. Legoux, F. *et al.* Microbial metabolites control the thymic development of mucosal-  
951 associated invariant T cells. *Science* **366**, 494-499 (2019).  
952
- 953 29. Napier, R.J., Adams, E.J., Gold, M.C. & Lewinsohn, D.M. The Role of Mucosal Associated  
954 Invariant T Cells in Antimicrobial Immunity. *Front Immunol* **6**, 344 (2015).  
955
- 956 30. van der Windt, G.J. *et al.* Mitochondrial respiratory capacity is a critical regulator of  
957 CD8+ T cell memory development. *Immunity* **36**, 68-78 (2012).  
958
- 959 31. van der Windt, G.J. & Pearce, E.L. Metabolic switching and fuel choice during T-cell  
960 differentiation and memory development. *Immunol Rev* **249**, 27-42 (2012).  
961
- 962 32. Engel, I. *et al.* Innate-like functions of natural killer T cell subsets result from highly  
963 divergent gene programs. *Nat Immunol* **17**, 728-739 (2016).  
964
- 965 33. Lee, Y.J. *et al.* Lineage-Specific Effector Signatures of Invariant NKT Cells Are Shared  
966 amongst gammadelta T, Innate Lymphoid, and Th Cells. *J Immunol* **197**, 1460-1470  
967 (2016).  
968
- 969 34. Georgiev, H., Ravens, I., Benarafa, C., Forster, R. & Bernhardt, G. Distinct gene  
970 expression patterns correlate with developmental and functional traits of iNKT subsets.  
971 *Nat Commun* **7**, 13116 (2016).  
972
- 973 35. Jaiswal, A.K., Sadasivam, M. & Hamad, A.R.A. Unexpected alliance between syndecan-1  
974 and innate-like T cells to protect host from autoimmune effects of interleukin-17. *World*  
975 *J Diabetes* **9**, 220-225 (2018).  
976
- 977 36. Trapnell, C. *et al.* The dynamics and regulators of cell fate decisions are revealed by  
978 pseudotemporal ordering of single cells. *Nat Biotechnol* **32**, 381-386 (2014).  
979
- 980 37. Martin, E. *et al.* Stepwise development of MAIT cells in mouse and human. *PLoS Biol* **7**,  
981 e54 (2009).  
982
- 983 38. Bortoluzzi, S. *et al.* Brief homogeneous TCR signals instruct common iNKT progenitors  
984 whose effector diversification is characterized by subsequent cytokine signaling.  
985 *Immunity* **54**, 2497-2513 e2499 (2021).  
986
- 987 39. Milner, J.J. *et al.* Runx3 programs CD8(+) T cell residency in non-lymphoid tissues and  
988 tumours. *Nature* **552**, 253-257 (2017).  
989
- 990 40. Boursalian, T.E., Golob, J., Soper, D.M., Cooper, C.J. & Fink, P.J. Continued maturation of  
991 thymic emigrants in the periphery. *Nat Immunol* **5**, 418-425 (2004).  
992



- 993 41. McCaughtry, T.M., Wilken, M.S. & Hogquist, K.A. Thymic emigration revisited. *J Exp Med*  
994 **204**, 2513-2520 (2007).  
995
- 996 42. Wang, H. & Hogquist, K.A. CCR7 defines a precursor for murine iNKT cells in thymus and  
997 periphery. *Elife* **7** (2018).  
998
- 999 43. Wagner, A. *et al.* Metabolic modeling of single Th17 cells reveals regulators of  
1000 autoimmunity. *Cell* **184**, 4168-4185 e4121 (2021).  
1001
- 1002 44. Thiele, I. *et al.* A community-driven global reconstruction of human metabolism. *Nat*  
1003 *Biotechnol* **31**, 419-425 (2013).  
1004
- 1005 45. Ganesan, A.P. *et al.* Tissue-resident memory features are linked to the magnitude of  
1006 cytotoxic T cell responses in human lung cancer. *Nat Immunol* **18**, 940-950 (2017).  
1007
- 1008 46. Murray, M.P. *et al.* Transcriptome and chromatin landscape of iNKT cells are shaped by  
1009 subset differentiation and antigen exposure. *Nat Commun* **12**, 1446 (2021).  
1010
- 1011 47. Cano-Gamez, E. *et al.* Single-cell transcriptomics identifies an effectorness gradient  
1012 shaping the response of CD4(+) T cells to cytokines. *Nat Commun* **11**, 1801 (2020).  
1013
- 1014 48. Reina-Campos, M., Scharping, N.E. & Goldrath, A.W. CD8(+) T cell metabolism in  
1015 infection and cancer. *Nat Rev Immunol* (2021).  
1016
- 1017 49. Konjar, S. & Veldhoen, M. Dynamic Metabolic State of Tissue Resident CD8 T Cells. *Front*  
1018 *Immunol* **10**, 1683 (2019).  
1019
- 1020 50. Stuart, T. *et al.* Comprehensive Integration of Single-Cell Data. *Cell* **177**, 1888-1902  
1021 e1821 (2019).  
1022
- 1023 51. Lopes, N. *et al.* Distinct metabolic programs established in the thymus control effector  
1024 functions of gammadelta T cell subsets in tumor microenvironments. *Nat Immunol* **22**,  
1025 179-192 (2021).  
1026
- 1027 52. Konjar, S. *et al.* Mitochondria maintain controlled activation state of epithelial-resident  
1028 T lymphocytes. *Sci Immunol* **3** (2018).  
1029
- 1030 53. Zinser, M.E. *et al.* Human MAIT cells show metabolic quiescence with rapid glucose-  
1031 dependent upregulation of granzyme B upon stimulation. *Immunol Cell Biol* **96**, 666-674  
1032 (2018).  
1033
- 1034 54. Carolan, E. *et al.* Altered distribution and increased IL-17 production by mucosal-  
1035 associated invariant T cells in adult and childhood obesity. *J Immunol* **194**, 5775-5780  
1036 (2015).

- 1037  
1038 55. Toubal, A. *et al.* Mucosal-associated invariant T cells promote inflammation and  
1039 intestinal dysbiosis leading to metabolic dysfunction during obesity. *Nat Commun* **11**,  
1040 3755 (2020).  
1041  
1042 56. Brien, A.O. *et al.* Targeting mitochondrial dysfunction in MAIT cells limits IL-17  
1043 production in obesity. *Cell Mol Immunol* **17**, 1193-1195 (2020).  
1044  
1045 57. Constantinides, M.G. *et al.* MAIT cells are imprinted by the microbiota in early life and  
1046 promote tissue repair. *Science* **366** (2019).  
1047  
1048 58. Riffelmacher, T. *et al.* Autophagy-Dependent Generation of Free Fatty Acids Is Critical  
1049 for Normal Neutrophil Differentiation. *Immunity* **47**, 466-480 e465 (2017).  
1050  
1051 59. Butler, A., Hoffman, P., Smibert, P., Papalexi, E. & Satija, R. Integrating single-cell  
1052 transcriptomic data across different conditions, technologies, and species. *Nat*  
1053 *Biotechnol* **36**, 411-420 (2018).  
1054  
1055 60. Cao, J. *et al.* The single-cell transcriptional landscape of mammalian organogenesis.  
1056 *Nature* **566**, 496-502 (2019).  
1057  
1058 61. Gondro, C., Porto-Neto, L.R. & Lee, S.H. SNPQC--an R pipeline for quality control of  
1059 Illumina SNP genotyping array data. *Anim Genet* **45**, 758-761 (2014).  
1060  
1061 62. Li, H. *et al.* The Sequence Alignment/Map format and SAMtools. *Bioinformatics* **25**,  
1062 2078-2079 (2009).  
1063  
1064 63. Garrison, E. & Marth, G. Haplotype-based variant detection from short-read sequencing.  
1065 *arXiv preprint arXiv:1207.3907 [q-bio.GN]* (2012).  
1066  
1067  
1068

1069 **Figure 1: Heterogeneity of mouse MAIT cells**

1070 (A) Transcriptomic analysis of 6,080 mouse MAIT cells at steady state was performed using  
1071 10X Genomics platform. t-distributed stochastic neighbor embedding (t-SNE) plots were  
1072 generated by pooling four individual scRNA-seq libraries of MAIT cells from thymus, lung,  
1073 liver and spleen. Clusters were identified by shared nearest neighbor modularity  
1074 optimization-based clustering algorithm. (B) Bar graph shows for each cluster the tissue  
1075 origin of the MAIT cells contributing to that cluster. (C) Dot plot showing top 5 positive  
1076 marker genes in each cluster. Color gradient and dot size indicate gene expression  
1077 intensity and the relative proportion of cells within the cluster expressing each gene,  
1078 respectively. (D) t-SNE plot showing the MAIT1 and MAIT17 signature scores for each cell.  
1079 Signature scores are the difference between the average expression levels of a gene set  
1080 and control genes for each cell. (E) Representative flow cytometry plots showing surface  
1081 expression of CXCR3 and ICOS on MAIT cells from the indicated organs (top row) and the  
1082 co-expression of T-bet with CXCR3 (middle) and ROR $\gamma$ T with ICOS (bottom). (F) Flow  
1083 cytometry data were acquired using a panel of 17 fluorescent parameters. MAIT cell data  
1084 from liver, lung and spleen were used to perform UMAP dimensional reduction and  
1085 unsupervised clustering using the FlowSOM algorithm on the OMIQ software. A total of  
1086 3791 MAIT cells were included in this analysis. (G) Cytokine expression by MAIT cells upon  
1087 PMA/Ionomycin stimulation in vitro. Intracellular cytokine staining data are representative of  
1088 3-4 mice per group, representative of 2-3 experiments.

1089

1090 **Figure 2: MAIT cell changes in gene expression during thymus differentiation.**

1091 (A) Single-cell trajectories of mouse MAIT thymocytes constructed using Monocle 3.  
1092 UMAP shows cells colored by pseudotime values along the trajectory. (B) UMAP showing  
1093 distribution of thymic MAIT cell clusters across branches of single-cell trajectories.  
1094 Cluster colors and numbers as in Fig 1A. (C) Heatmap showing different stages of  
1095 thymus MAIT cell differentiation and respective cell clusters on the x-axis and co-  
1096 regulated gene modules on the y-axis. Modules consist of genes that are differentially  
1097 expressed along the thymus trajectory path. The legend shows color-coded aggregate  
1098 scores for each gene module in all the clusters; positive scores indicate higher gene  
1099 expression. (D) Scaled average expression heatmap of top 10 genes from each  
1100 thymocyte gene module based on high Morans I value that were expressed in the  
1101 indicated clusters of MAIT thymocytes. (E) Flow cytometry data were acquired using a  
1102 panel of 17 different fluorescent parameters. MAIT cell cytometry data from mouse  
1103 thymi (n=5) were used to perform UMAP dimensional reduction and unsupervised  
1104 clustering using the FlowSOM algorithm on the OMIQ software. A total of 1,568 MAIT  
1105 thymocytes from 9-week-old mice were used for the analysis. All mice were 9-week-old  
1106 C57BL/6 females.

1107

### 1108 **Figure 3: Circulatory MAIT cells are related to recent thymic emigrants**

1109 (A) t-SNE showing the circulatory and tissue resident signature scores for each cell MAIT  
1110 cell from the four organs from the mouse scRNA-seq data. (B) t-SNE showing expression  
1111 of *Sell*, *Ccr7*, *CD4*, *CD8a*, *Lef1*, *CD44*, *Rorc* and *Tbx21* transcripts in MAIT cells. Single-cell  
1112 trajectory analysis of MAIT cells in spleen (C) and lung (D) showing cells ordered in  
1113 pseudotime and placed along a trajectory of gene expression changes, constructed using

1114 Monocle 3. Figure shows the UMAP with cells colored by pseudotime values (left) and the  
1115 UMAP with cells colored by clusters as in Fig. 1A (right). Darker violet color denotes the  
1116 root cells and yellow color denotes the outcome. (E) Representative flow cytometry (left)  
1117 plots showing surface expression of CD62L and CD8 $\alpha$  by MAIT cells in C57BL/6 mice in  
1118 the indicated tissues. Percentage of CD62L<sup>+</sup> MAIT cells (right, displayed as mean $\pm$ □□SD)  
1119 in the indicated organs (n = number of mice). One-way analysis of variance (ANOVA)  
1120 with post-hoc Tukey test. Liver n= 19, Lung n= 16, Spleen n = 16, Thymus n= 19. \*\*\*\*:  
1121 adjusted p-value < 0.0001. Mixed male and female mice, 14.8 $\pm$ 6.2 weeks-old. (F)  
1122 Representative flow cytometry plots (left) showing surface expression of CD62L and GFP  
1123 by MAIT cells in four-week-old Rag2:GFP mice (n=6) in the indicated tissues. Percentage  
1124 of GFP<sup>+</sup>CD62L<sup>+</sup> MAIT cells (right, displayed as mean $\pm$ □□SD) in the indicated organs.  
1125 One-way ANOVA with post-hoc Tukey test, \*P $\square$ <0.05, \*\*P $\square$ <0.01. Flow cytometry data  
1126 are representative of 2-3 experiments.

1127

#### 1128 **Figure 4: Mouse MAIT cell subsets have distinct metabolic features**

1129 (A-B) Metabolic parameters of MAIT thymocytes were quantified for the MAIT cell  
1130 differentiation stages 1-3 and MAIT1, MAIT17 and MAIT<sub>CIRC</sub> subsets. Representative  
1131 histograms (A) and quantification (B) are depicted as geometric mean fluorescence  
1132 intensity (gMFI). Thymic MAIT cell precursor stages 1-3 were defined based on CD24 and  
1133 CD44 expression. Neutral lipid droplets were quantified by Bodipy 493/503 fluorescence  
1134 (left), fatty acid uptake was quantified as intensity of Bodipy FL C16 fluorescence (center  
1135 left), mitochondrial content was quantified as Mitotracker Deep Red FM fluorescence  
1136 (center right) and glucose consumption by uptake of 2-deoxy-2-[(7-nitro-2,1,3-

1137 benzoxadiazol-4-yl)amino]-D-glucose (2NBDG) (right). (C-H) Cells were isolated from  
1138 spleen, lung and liver and metabolic parameters were quantified in CD8<sup>+</sup> T cells and MAIT  
1139 cell subsets. TCRβ<sup>+</sup> CD8<sup>+</sup> T cells excluding MAITs were subdivided into naïve, central  
1140 memory (CM) and effector memory (EM) subsets based on expression of CD62L and  
1141 CD44. Quantification (C) and representative histograms (D) of fatty acid uptake in the  
1142 indicated cell types and organs were measured as gMFI of Bodipy FL C16. Quantification  
1143 (E) and representative histograms (F) of neutral lipid droplet content in indicated cell types  
1144 and organs were measured as gMFI of Bodipy 493/503 fluorescence. Quantification (G)  
1145 and representative histograms (H) of mitochondrial content in indicated cell types and  
1146 organs were measured as gMFI of MitoTracker Deep Red FM signal. Data from 3-4 mice  
1147 per group, representative of ≥3 experiments. Data analyzed by one-way ANOVA with  
1148 Dunnett's post-test for multiple comparisons, displayed as mean±SEM, \* $P < 0.05$ ,  
1149 \*\* $P < 0.01$  \*\*\* $P < 0.001$  and \*\*\*\* $P < 0.0001$ .

1150

### 1151 **Figure 5: Heterogeneity of human MAIT cells**

1152 (A) Transcriptomic analysis on 3,020 human MAIT cells (hMR1:5-OP-RU<sup>+</sup> TCRβ<sup>+</sup>) was  
1153 performed using the 10X Genomics platform. t-SNE plots generated by combining three  
1154 individual scRNA-seq libraries from human thymus (n=5), lung (n=4) and PBMCs (n=4). (B)  
1155 Bar graph shows the contribution of MAIT cells from different tissues to individual clusters.  
1156 (C) Dot plot showing top 5 positive marker genes in each cluster. Color gradient and size  
1157 of dots indicate gene expression intensity and the relative proportion of cells within the  
1158 cluster expressing each gene, respectively. (D) t-SNE showing the MAIT1, MAIT17,  
1159 tissue residency and circulating signature scores for each cell. Positive scores indicate high

1160 expression of genes in the gene set of interest as compared to randomly selected controls.  
1161 (E) UMAP (left) of human MAIT cells from thymus with cells ordered in pseudotime and  
1162 UMAP showing distribution of thymic MAIT cells (right) across branches of single-cell  
1163 trajectories. Cells are colored and numbered by clusters as in Fig. 5A. (F) Heatmap  
1164 showing different stages of development and respective cell clusters on the *x*-axis and  
1165 co-regulated gene modules on the *y*-axis. Modules were generated with genes that are  
1166 differentially expressed along the trajectory path. The legend shows color-coded  
1167 aggregate module scores for gene modules for cells in each cluster; positive scores  
1168 indicate higher gene expression. (G) Scaled average expression heatmap of top 10  
1169 genes from modules that were expressed in indicated stages of MAIT cell development  
1170 based on high Morans\_I value as shown in Fig 5F. These genes were selected based  
1171 on their expression changes as the cells progress along the MAIT cell developmental  
1172 trajectory.

1173 **Figure 6: Human MAIT cell metabolic parameters differ from naïve CD8<sup>+</sup> T cells**

1174 Cells were isolated from paired samples of human lung biopsies (A and B) or blood (C  
1175 and D) and metabolic parameters were quantified in CD8<sup>+</sup> T cell and MAIT cell subsets.  
1176 TCRβ<sup>+</sup> CD8<sup>+</sup> T cells excluding MAITs were subdivided into naïve, central memory (CM),  
1177 effector memory (EM) and resident memory (RM) subsets based on expression of  
1178 CD45RA, CCR7 and CD103. Representative histograms (A, C) and quantification (B, D)  
1179 of fatty acid uptake (left) was measured as gMFI of Bodipy FL C16. Neutral lipid droplet  
1180 content (middle) was measured as gMFI of Bodipy 493/503 fluorescence. Mitochondrial  
1181 potential is indicated as gMFI of Mitotracker Deep Red FM signal (right). Data combined  
1182 from 2 experiments and 3 patients (A-B) or from 3 experiments and 3 donors (C-D).

1183 Data were analyzed by one-way ANOVA with Dunnett's post-test for multiple  
1184 comparisons, displayed as mean $\pm$ SEM, \*P $\leq$ 0.05, \*\*P $\leq$ 0.01 \*\*\*P $\leq$ 0.001 and  
1185 \*\*\*\*P $\leq$ 0.0001.

1186 **Figure 7: Divergent mouse and human peripheral MAIT cell subsets**

1187 (A) Aggregated UMAP representation of scRNA-seq data from mouse and human MAIT  
1188 cells. (B) Mouse and human cells shown in separate UMAPs with the same coordinates  
1189 as in Fig 7A. (C) Dot plot showing top 5 marker genes in each integrated cluster across  
1190 both mouse and human cells. Color gradient and size of dots indicate gene expression  
1191 intensity and the relative proportion of cells (within the cluster) expressing each gene  
1192 respectively. (D) SPF mice were cross-fostered with mice from pet shops. The figure  
1193 represents the percentage of MAIT cells expressing SDC1, KLRG1, T-bet and ROR $\gamma$ T  
1194 in lungs of the indicated mice. Data analyzed by one-way ANOVA with Tukey test  
1195 displayed as mean $\pm$  S.D. SPF mice n = 10, Pet shop mice n=16 and Cross-fostered  
1196 mice n=6, \*P $\leq$ 0.05, \*\*P $\leq$ 0.01 \*\*\*P $\leq$ 0.001 and \*\*\*\*P $\leq$ 0.0001.

1197

1198

1199

1200

1201

1202

1203

1204

1205



1206

1207

1208

1209 **Extended Data Figure 1: Characterization of mouse MAIT cell subsets**

1210 (A) Representative flow cytometry gating used to identify MAIT cells in different tissues.

1211 Live/Dead Yellow negative single cell events were gated by excluding antigen-

1212 presenting cells (DUMP: CD11c, CD11b, IgD, B220) and  $\gamma\delta$  T cells from the CD45<sup>+</sup>

1213 population, CD4<sup>+</sup>, CD8<sup>+</sup> double positive cells were excluded as well. (B) t-SNE plot

1214 showing the degree to which MAIT cell clusters are composed of cells from the

1215 indicated mouse tissues. Each cluster has the same t-SNE coordinates as in Fig. 1A.

1216 (C) MFI indicating expression of T-bet and ROR $\gamma$ T transcription factors in spleen MAIT

1217 cell subpopulations defined by surface markers as MAIT1 (CXCR3<sup>+</sup>) and MAIT17

1218 (ICOS<sup>+</sup>). Paired t-test. n = 3. \*: p < 0.05; \*\*: p < 0.01; (D) Frequency of CXCR3<sup>+</sup> and

1219 ICOS<sup>+</sup> MAIT cells in the indicated tissues. One-way ANOVA with post-hoc Tukey test.

1220 Liver n = 7, Lung n = 15, Spleen n = 9, Thymus n = 5. \*\*\*\*: adjusted p < 0.0001. (E) Lung

1221 MAIT cell subpopulations were detected by flow cytometry according to markers for

1222 MAIT cell clusters determined by scRNA-seq. The total MAIT cell gate was initially

1223 separated by CD62L expression. The CD62L negative gate was further divided into

1224 MAIT17a (ICOS<sup>+</sup>CD138<sup>+</sup>CXCR3<sup>-</sup>), MAIT17b (ICOS<sup>+</sup>CD138<sup>-</sup>CXCR3<sup>-</sup>) or MAIT1 (ICOS<sup>-</sup>

1225 CD138<sup>-</sup>CXCR3<sup>+</sup>). The CD62L positive gate was divided into CD4<sup>+</sup>, CD8 $\beta$ <sup>+</sup> or double

1226 negative (DN) (CD4<sup>-</sup>CD8 $\beta$ <sup>-</sup>CD62L<sup>+</sup>) subpopulations. (F) Percentage of each MAIT cell

1227 subpopulation, as defined above, in different tissues. Using the global gating strategy

1228 defined in (E) in combination with thymus-specific markers to detect immature MAIT

1229 cells (CD44<sup>-</sup>CD24<sup>+</sup>CCR9<sup>+</sup>LEF1<sup>+</sup>SATB1<sup>+</sup>), the proportion of MAIT cell subpopulations  
1230 was determined for each tissue of 11 female C57BL/6 mice (12.3±6.1 weeks-old). Data  
1231 from 5 additional thymus tissues also were included.

1232 **Extended Data Figure 2: Transcriptional signatures reveal different stages of**  
1233 **thymus MAIT cell differentiation**

1234 (A) Expression of *Cd24a* and *Cd44* along the pseudotime trajectory for MAIT thymus  
1235 cells as constructed by Monocle 3. (B) Expression of the indicated stage-specific genes  
1236 along the pseudotime trajectory as constructed by Monocle 3. (C) Scaled average  
1237 expression heatmap of all the significantly differentially expressed genes along the MAIT  
1238 thymus trajectory with  $Morans\_I > 0.2$ . Heatmap shows cells from the indicated MAIT cell  
1239 differentiation stage and clusters from scRNA-seq on the x-axis. The gene modules to  
1240 which the stage-specific genes belong are shown on the y-axis. (D) Representative flow  
1241 cytometry plots for staining of gated, thymus MAIT cells for intracellular SATB1 or LEF1  
1242 along with surface expression of CD44, n = 5, from 2 experiments.

1243 **Extended Data Figure 3: Circulatory MAIT cells**

1244 (A) Heatmap showing expression of the 25 most significantly enriched transcripts  
1245 encoding ribosomal proteins in clusters 2, 4 and 7 in comparison with cluster 0.  
1246 Representative flow cytometry plots for the expression of CD62L and CD8 $\alpha$  in blood  
1247 MAIT cells from C57BL/6 mice (B) and Rag2:GFP mice (C). (D) Representative  
1248 expression of CCR7 and GFP in Rag2:GFP reporter mice. The percentage of MAIT  
1249 cells that are CCR7<sup>+</sup>, GFP<sup>+</sup> is indicated. (E) Intracellular staining for the transcription  
1250 factor LEF1 in CD44<sup>+</sup> or CD62L<sup>+</sup>spleen MAIT cells. Paired t-test, \*\*: p-value < 0.01. (F)  
1251 Percentage of LEF1<sup>+</sup> CD44<sup>-</sup> MAIT cells in different tissues. Intracellular staining for

1252 LEF1 in MAIT cells from liver, lung, spleen and thymus. One-way ANOVA with post-hoc  
1253 Tukey test. n = 4. \*\*\*\*: adjusted p-value < 0.0001., (E, F) 16 week- old female mice.

1254 **Extended Data Figure 4: Different metabolic signatures of MAIT cell subsets**

1255 (A) t-SNE showing oxidative phosphorylation, mitochondrial gene, fatty acid metabolism  
1256 and glycolysis signature scores for MAIT cells from the four sites. (B) Compass algorithm  
1257 was used to assess the metabolic heterogeneity of MAIT cells. Progenitor = cluster 6;  
1258 MAIT17= cells from clusters 0, 5 and 9; MAIT1= cluster 1; lung tissue resident= cluster 3;  
1259 circulatory= clusters 2, 4 and 7). All the subsets of MAIT cells were compared to progenitor  
1260 cells. Effect size with Cohen's d statistic was calculated between each subset of MAIT cell  
1261 in comparison to progenitor cells. Cohen's d values were used for the color scale to  
1262 represent in which MAIT subset each reaction pathway is being more or less (red or blue,  
1263 respectively) active as compared to the progenitor cluster 6 cells. Top 10 genes are shown  
1264 for fatty acid oxidation, glycolysis, amino acid metabolism and citric acid cycle with the  
1265 lowest adjusted p-values.

1266 **Extended Data Figure 5: Mouse MAIT17 cells have high metabolic activity**

1267 (A) Gating strategy for subsets of MAIT and conventional (conv) or mainstream CD8<sup>+</sup> T  
1268 cells. MAIT cells were divided into MAIT17 and MAIT1 subsets based on ICOS and CXCR3  
1269 expression. Thymus MAIT cells were divided into various stages based on CD24 and CD44  
1270 expression. Spleen TCRβ<sup>+</sup> CD8α<sup>+</sup> T cells, excluding MAIT cells, were subdivided into  
1271 naïve, central memory (CM) and effector memory (EM) subsets based on expression of  
1272 CD62L and CD44. (B) Cells were isolated from indicated tissues and kinetics of fluorescent  
1273 glucose (2-NBDG) uptake in MAIT1 (yellow) and MAIT17 (red) cell subsets was quantified;  
1274 representative histograms (left) and quantification (right). Timepoints represent technical

1275 replicates from 8 pooled mice. Data analyzed by 2-way ANOVA with Geisser-Greenhouse  
1276 correction, displayed as mean  $\pm$  SEM, \* $P < 0.05$ , \*\* $P < 0.01$  \*\*\* $P < 0.001$  and  
1277 \*\*\*\* $P < 0.0001$ .

1278

1279

## 1280 **Extended Data Figure 6: Human tissues have a distinct transcriptional signature**

1281 (A) Representative flow cytometry data used to identify MAIT cells in different human  
1282 tissues. Live/Dead Yellow negative single cell events were gated by excluding B cells  
1283 (CD19<sup>+</sup>). MAIT cells were identified as V $\alpha$ 7.2 TCR<sup>+</sup> and 5-OP-RU human MR1 tetramer<sup>+</sup>  
1284 cells. (B) t-SNE plots representing human MAIT cells colored by their origin from different  
1285 sites. (C) t-SNE representing cells from different donors (numbered) split by indicated  
1286 tissues after de-multiplexing. AMB (Ambiguous) represents cells with no donor assignment.  
1287 (D) t-SNE showing expression of *CD27* and *KLRB1* transcripts in all human MAIT cells  
1288 (upper plots) and expression of *CD27* and *KLRB1* along the pseudotime trajectory for  
1289 human MAIT thymus cells as constructed by Monocle 3 (lower plots).

## 1290 **Extended Data Figure 7: Transcriptional signatures reflect different stages of MAIT** 1291 **cell development in human thymus**

1292 (A) Scaled average expression heatmap of all the significantly differentially expressed  
1293 genes along the MAIT cell thymus trajectory with Morans\_I > 0.2. Heatmap shows cells  
1294 from the indicated clusters and MAIT cell differentiation stage on the top row. The gene  
1295 modules to which the stage-specific genes belong are shown on the y-axis. (B) Expression  
1296 of the indicated stage-specific genes along the pseudotime trajectory as constructed by  
1297 Monocle 3.

1298 **Extended Data Figure 8: Metabolic signature of human MAIT cells and integration of**  
1299 **human and mouse dataset**

1300 (A) t-SNE showing the oxidative phosphorylation, mitochondrial genes, fatty acid  
1301 metabolism and glycolysis signature scores for each human MAIT cell. (B) Cells were  
1302 isolated from human lung biopsies and stained with non-specific tetramer control (6FP, top)  
1303 or 5-OP-RU loaded MR1 tetramer to identify MAIT cells (bottom). CD3<sup>+</sup> 5-OP-RU-tetramer<sup>+</sup>  
1304 MAIT cells were further tested for V $\alpha$ 7.2 TCR alpha chain positivity and subdivided into  
1305 three subsets based on expression of CD161 and CD103, as shown. TCR $\beta$ <sup>+</sup> CD8<sup>+</sup> T cells  
1306 excluding MAIT cells were subdivided into naïve, central memory (CM), effector memory  
1307 (EM) and resident memory (RM) subsets based on expression of CD45RA, CCR7 and  
1308 CD103. (C) Integrated UMAP split by mouse and human showing clusters of cells with  
1309 same coordinates as in the Fig 7A. Cells are labelled according to the cluster numbers  
1310 in Fig 5 A (human) and Fig 1A (mouse).

1311 **Extended Data Figure 9: Comparison of human and mouse transcriptome and**  
1312 **analysis of MAIT cells in pet shop and cross-fostered mice**

1313 (A) UMAPs showing expression by human and mouse MAIT cells of the top two marker  
1314 genes of the indicated *i*-clusters. (B) Representative FACS plots from SPF, pet store  
1315 and cross-fostered mice showing percentage of MAIT cells, intracellular expression of  
1316 transcription factors T-bet and ROR $\gamma$ T and surface expression of KLRG1 and CD138.  
1317 (C) Percentage of MAIT cells in SPF, pet store and cross-fostered mice in lung. Data  
1318 analyzed by one-way ANOVA with Tukey test displayed as mean $\pm$  S.D. SPF mice n = 8,  
1319 Pet shop mice n=10 and Cross-fostered mice n=6.

1320

1321

1322



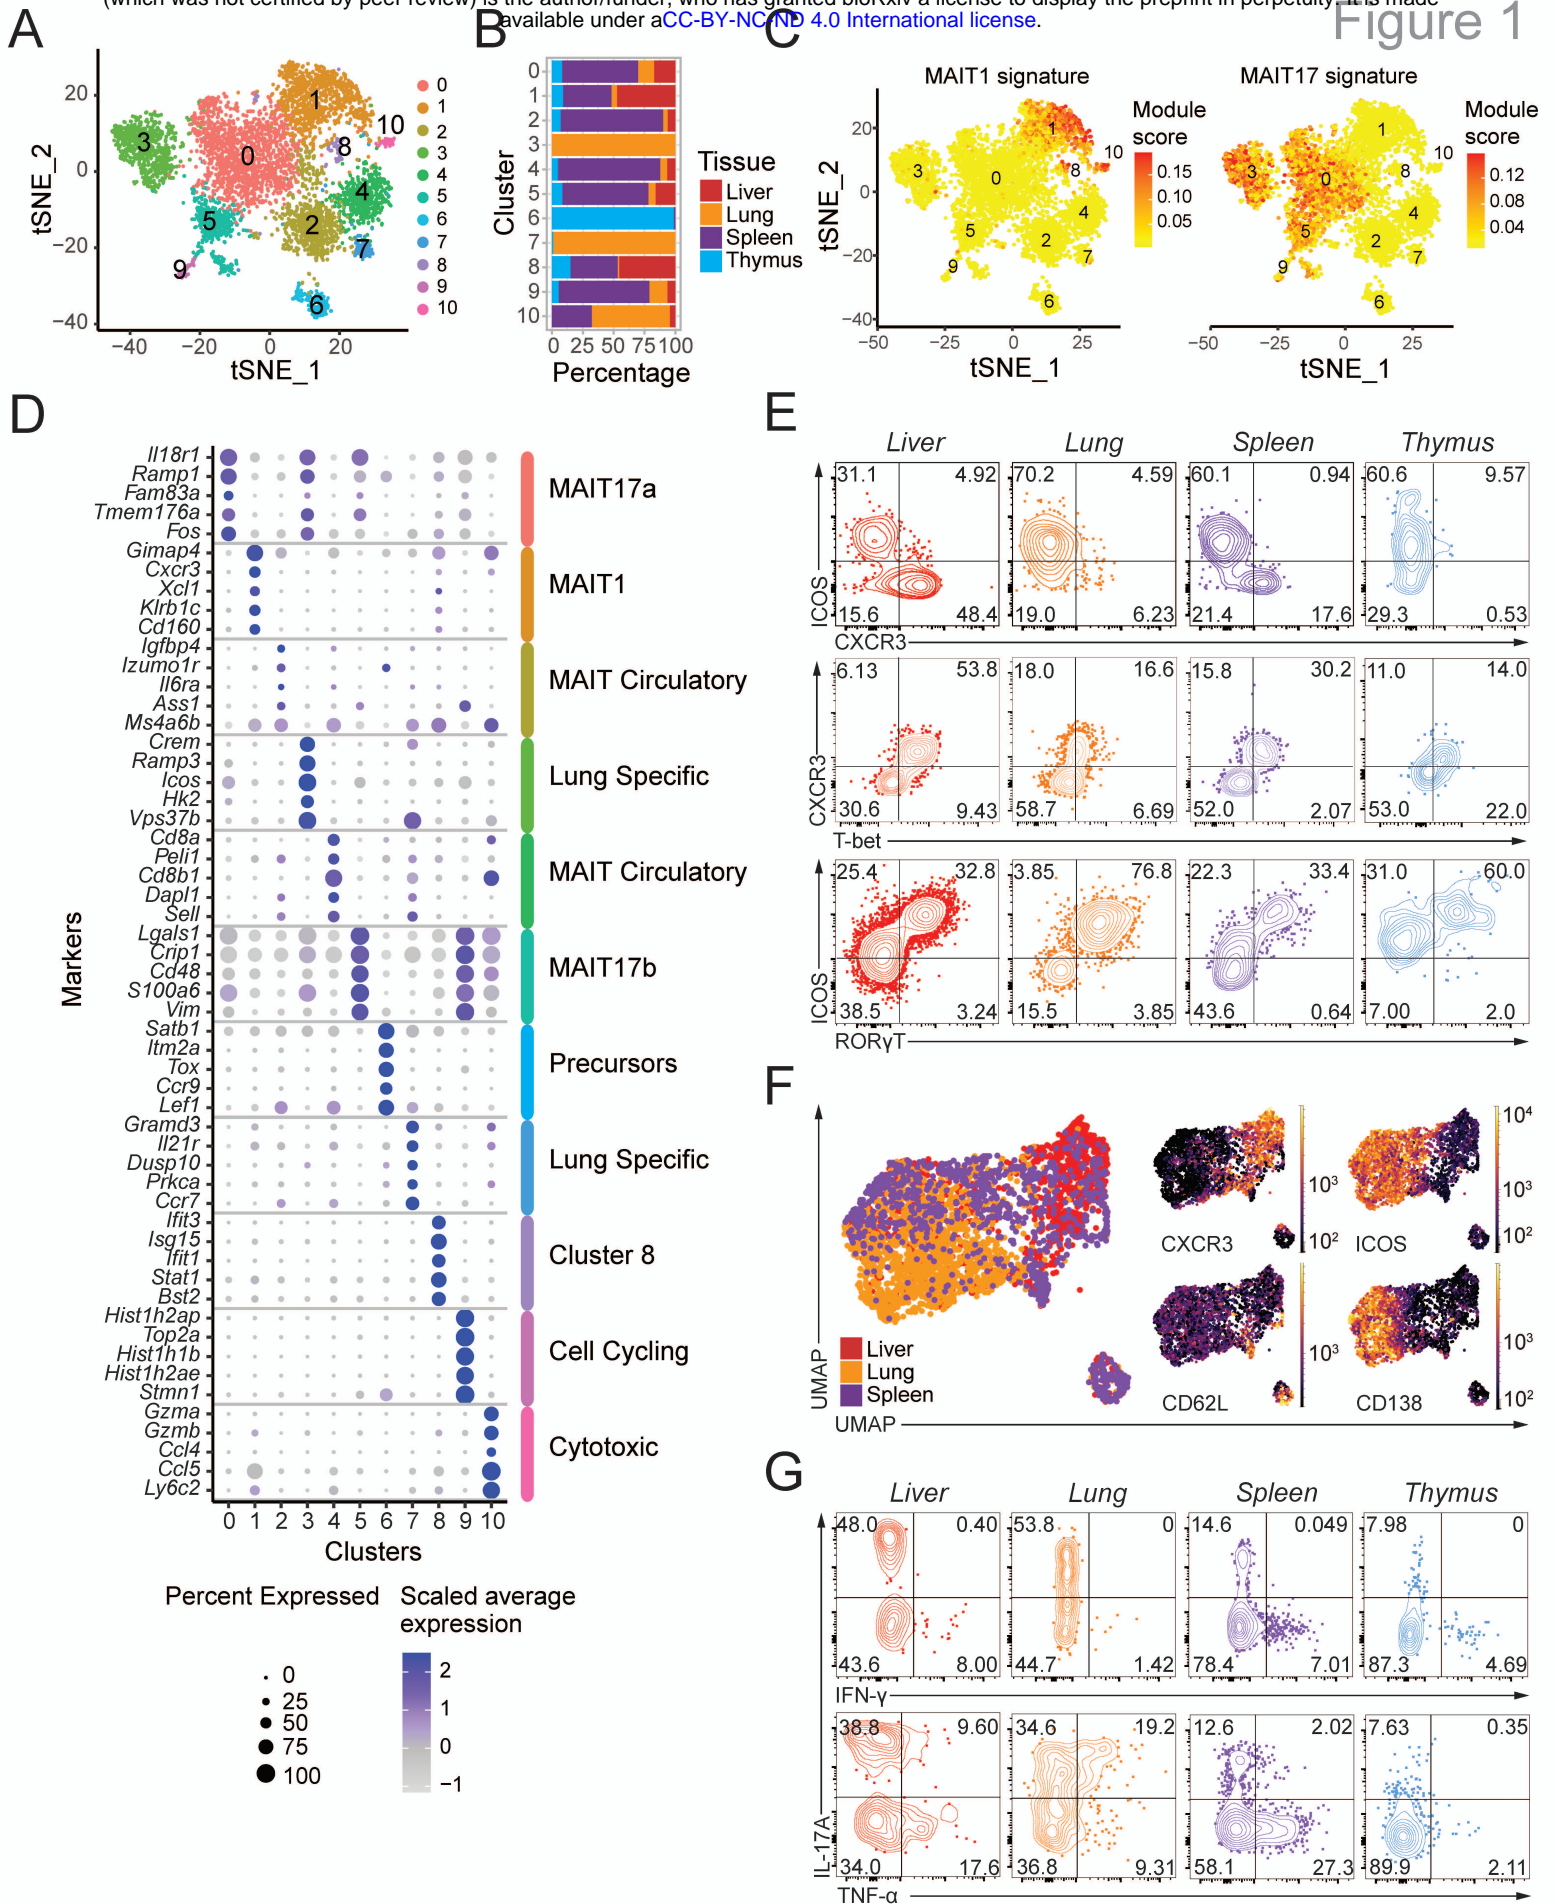

A

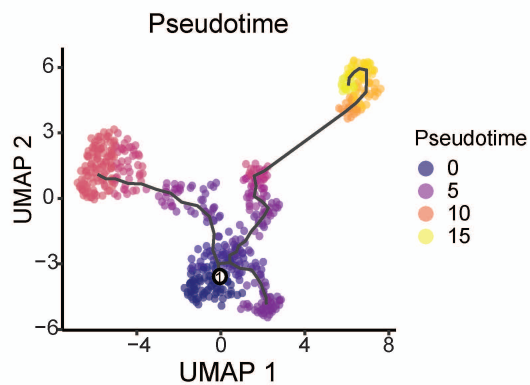

B

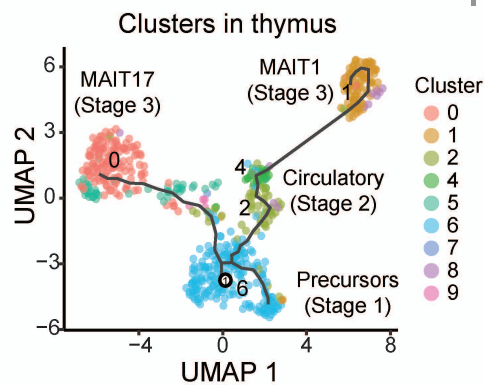

C

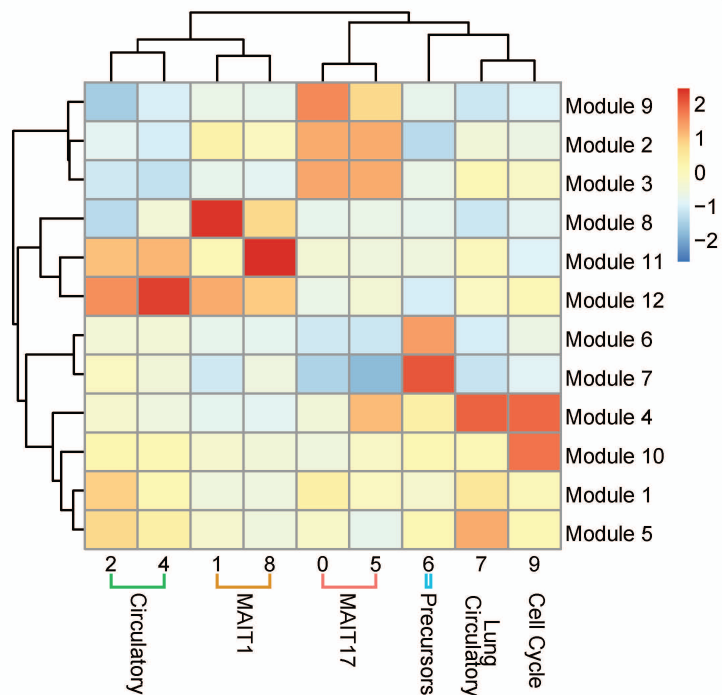

D

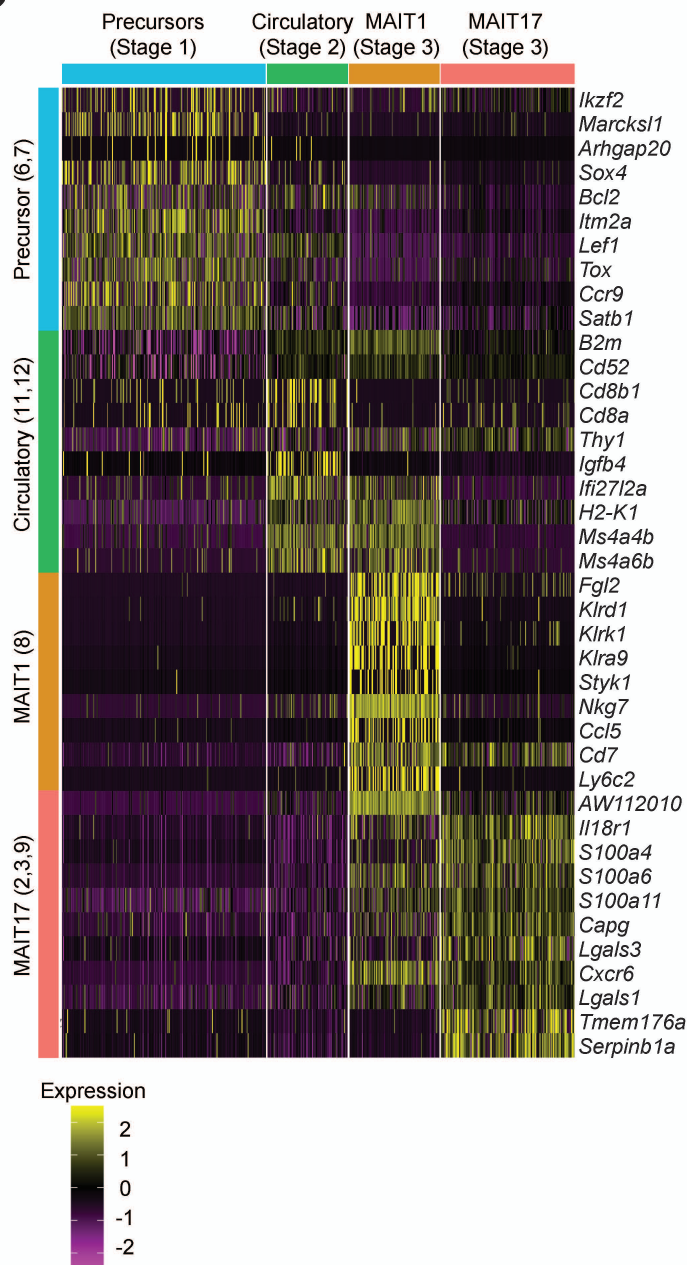

E

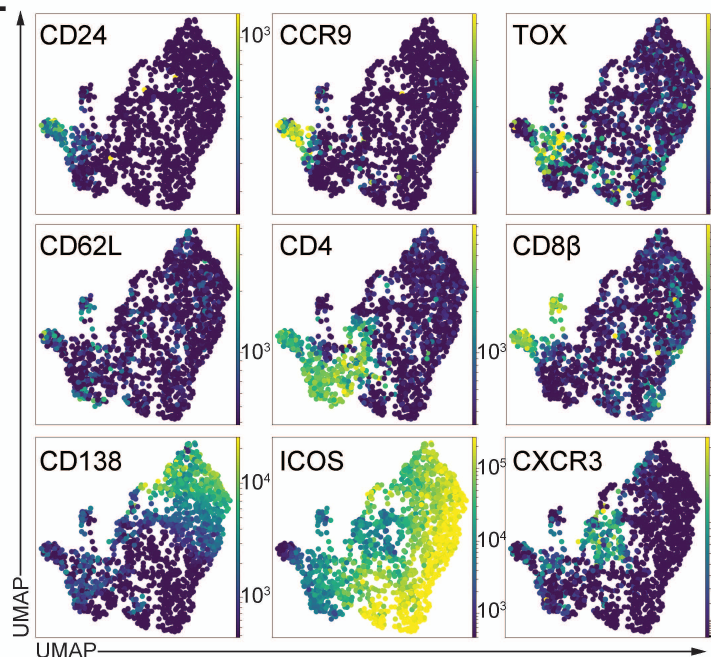



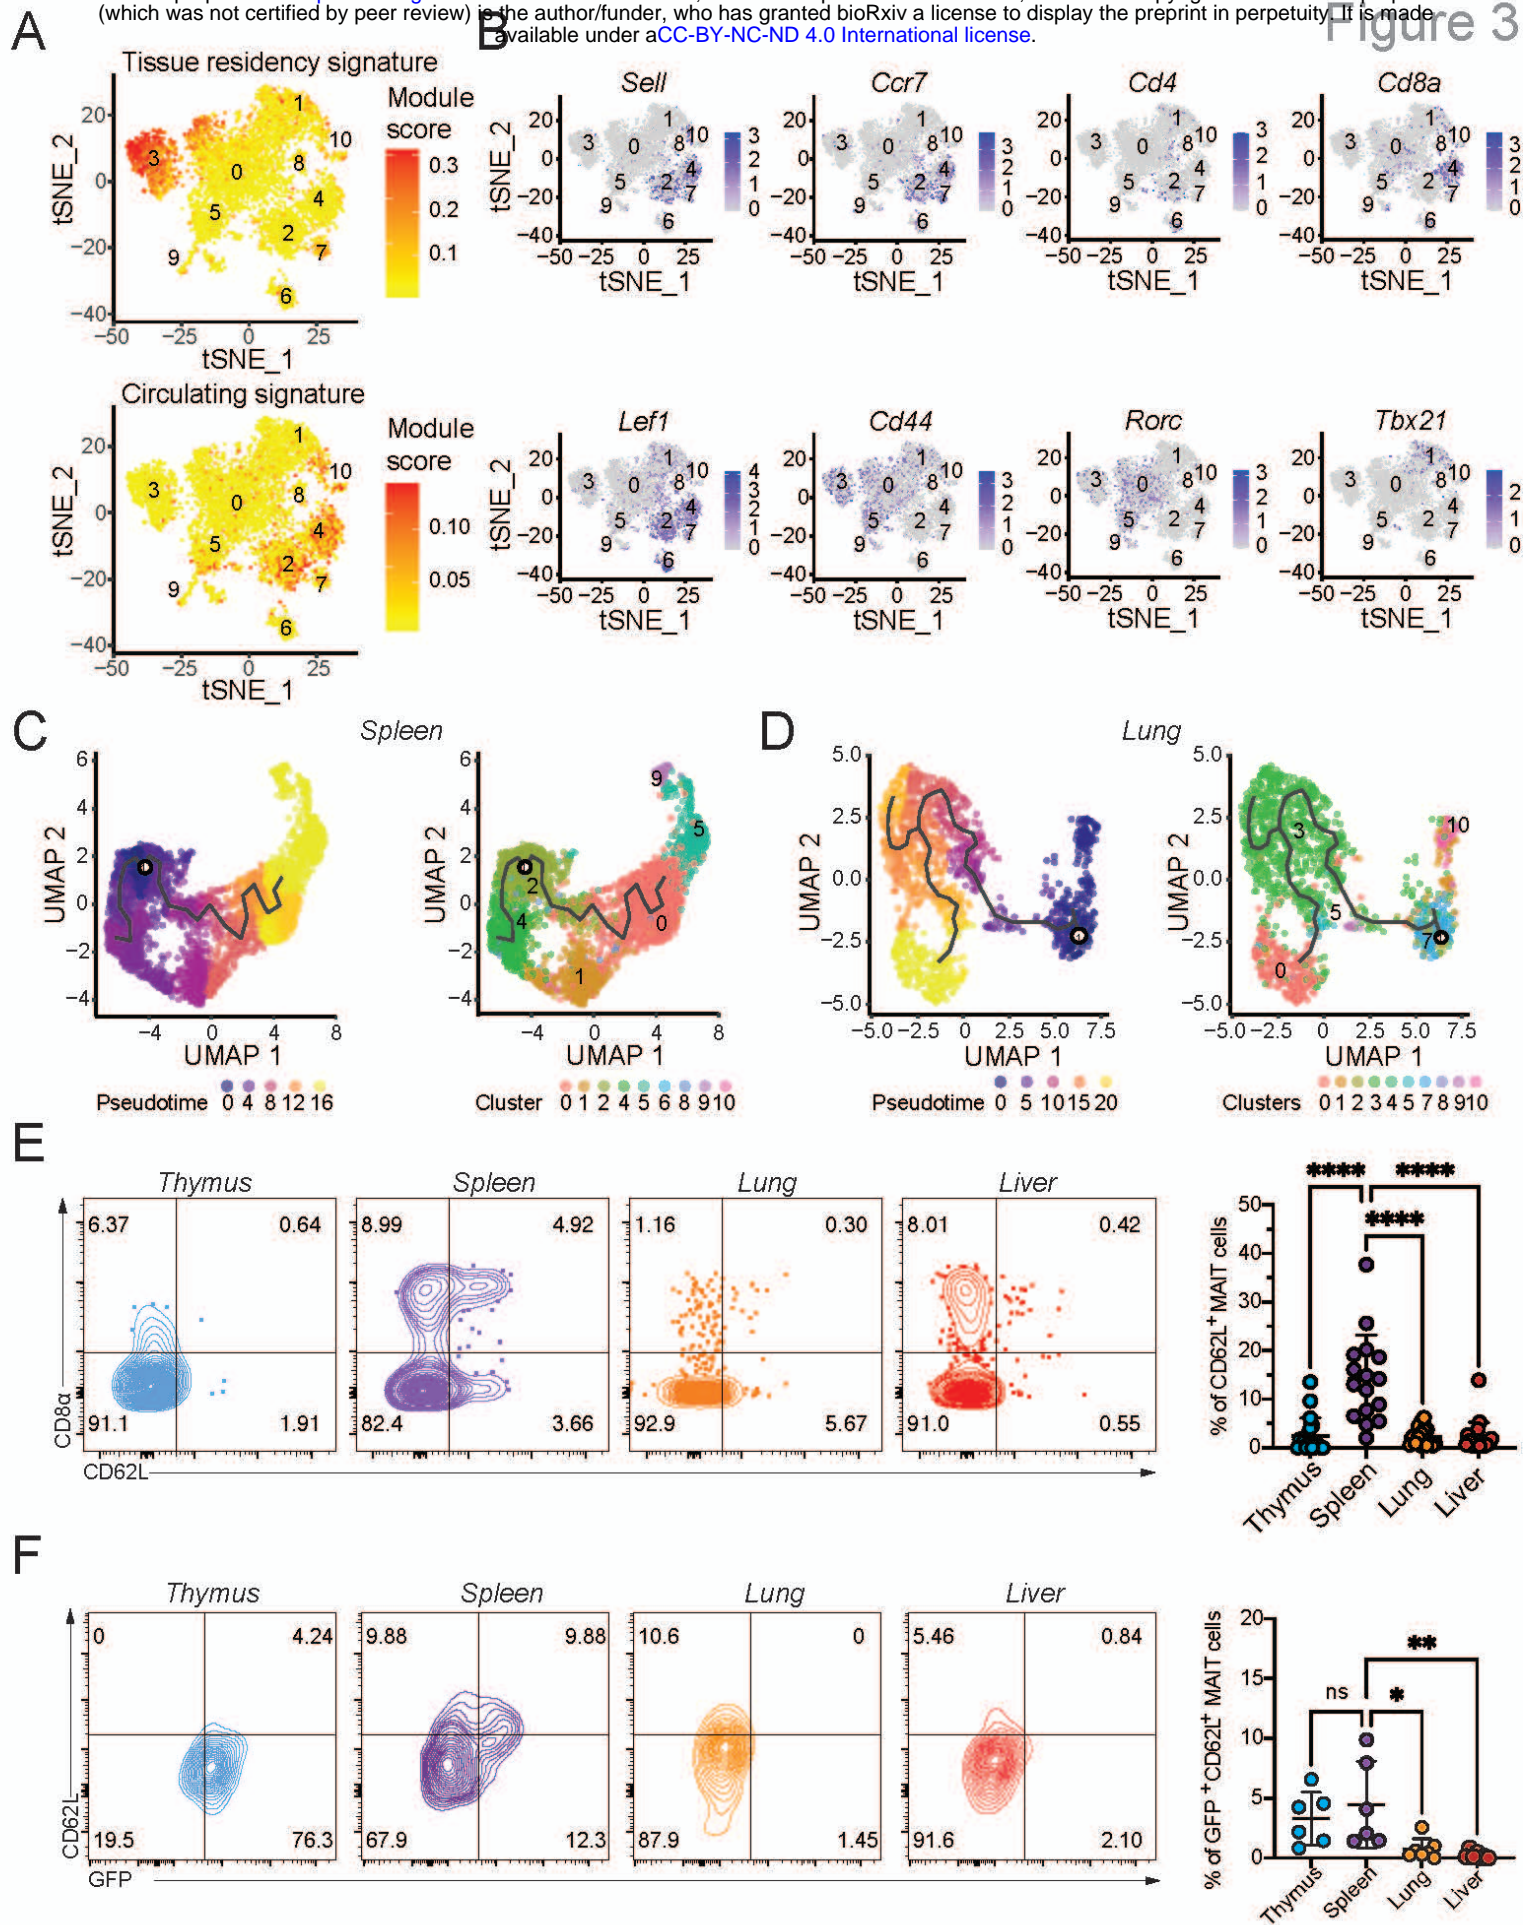

A

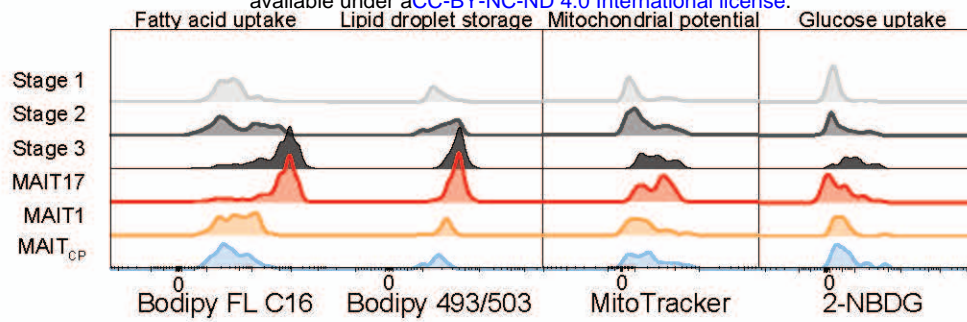

B

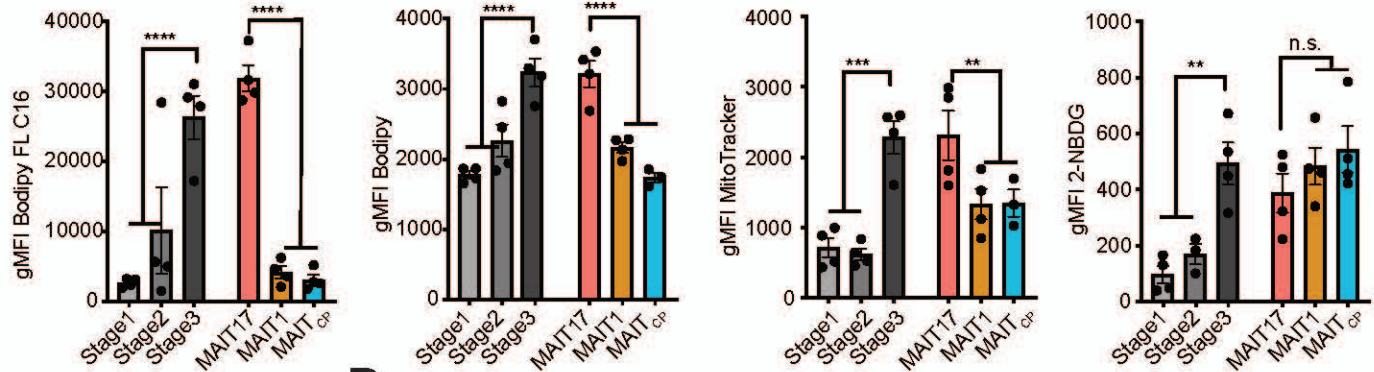

C

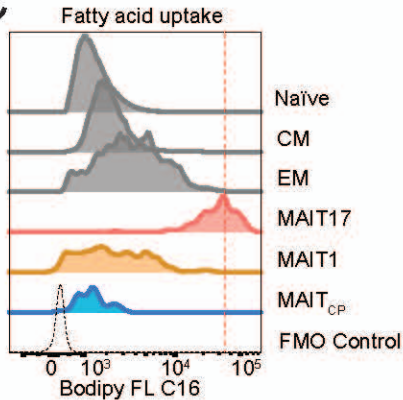

D

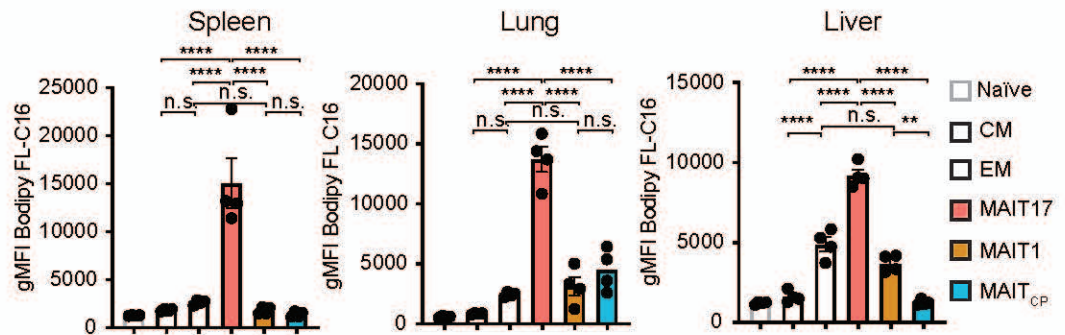

E

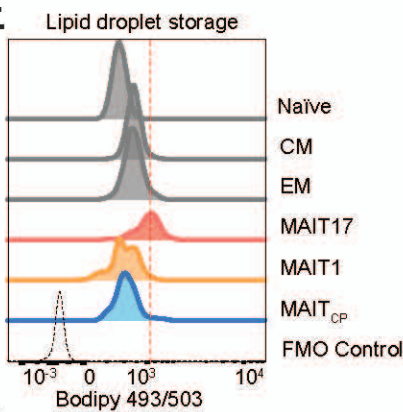

F

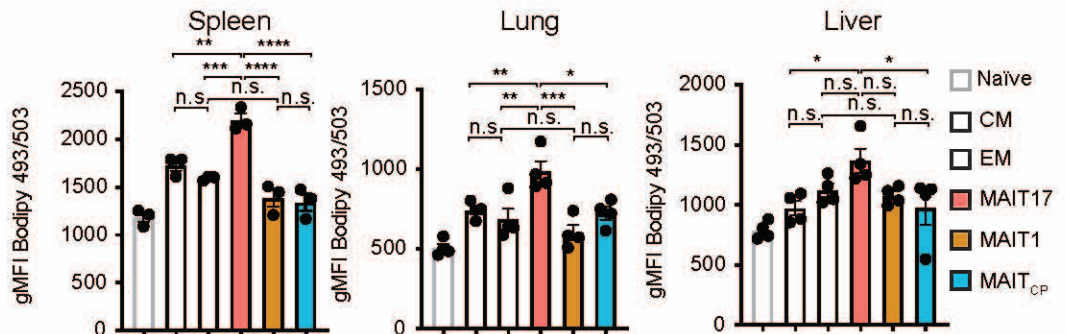

G

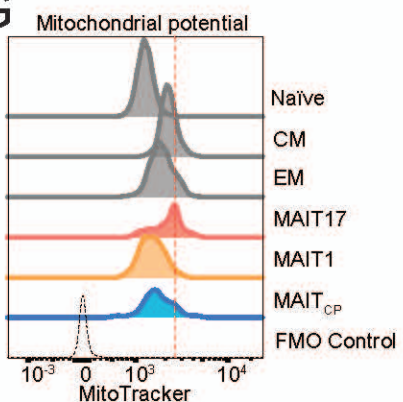

H

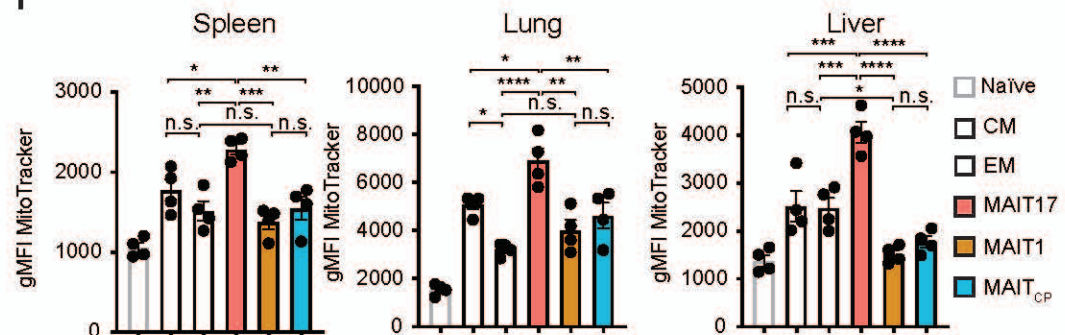



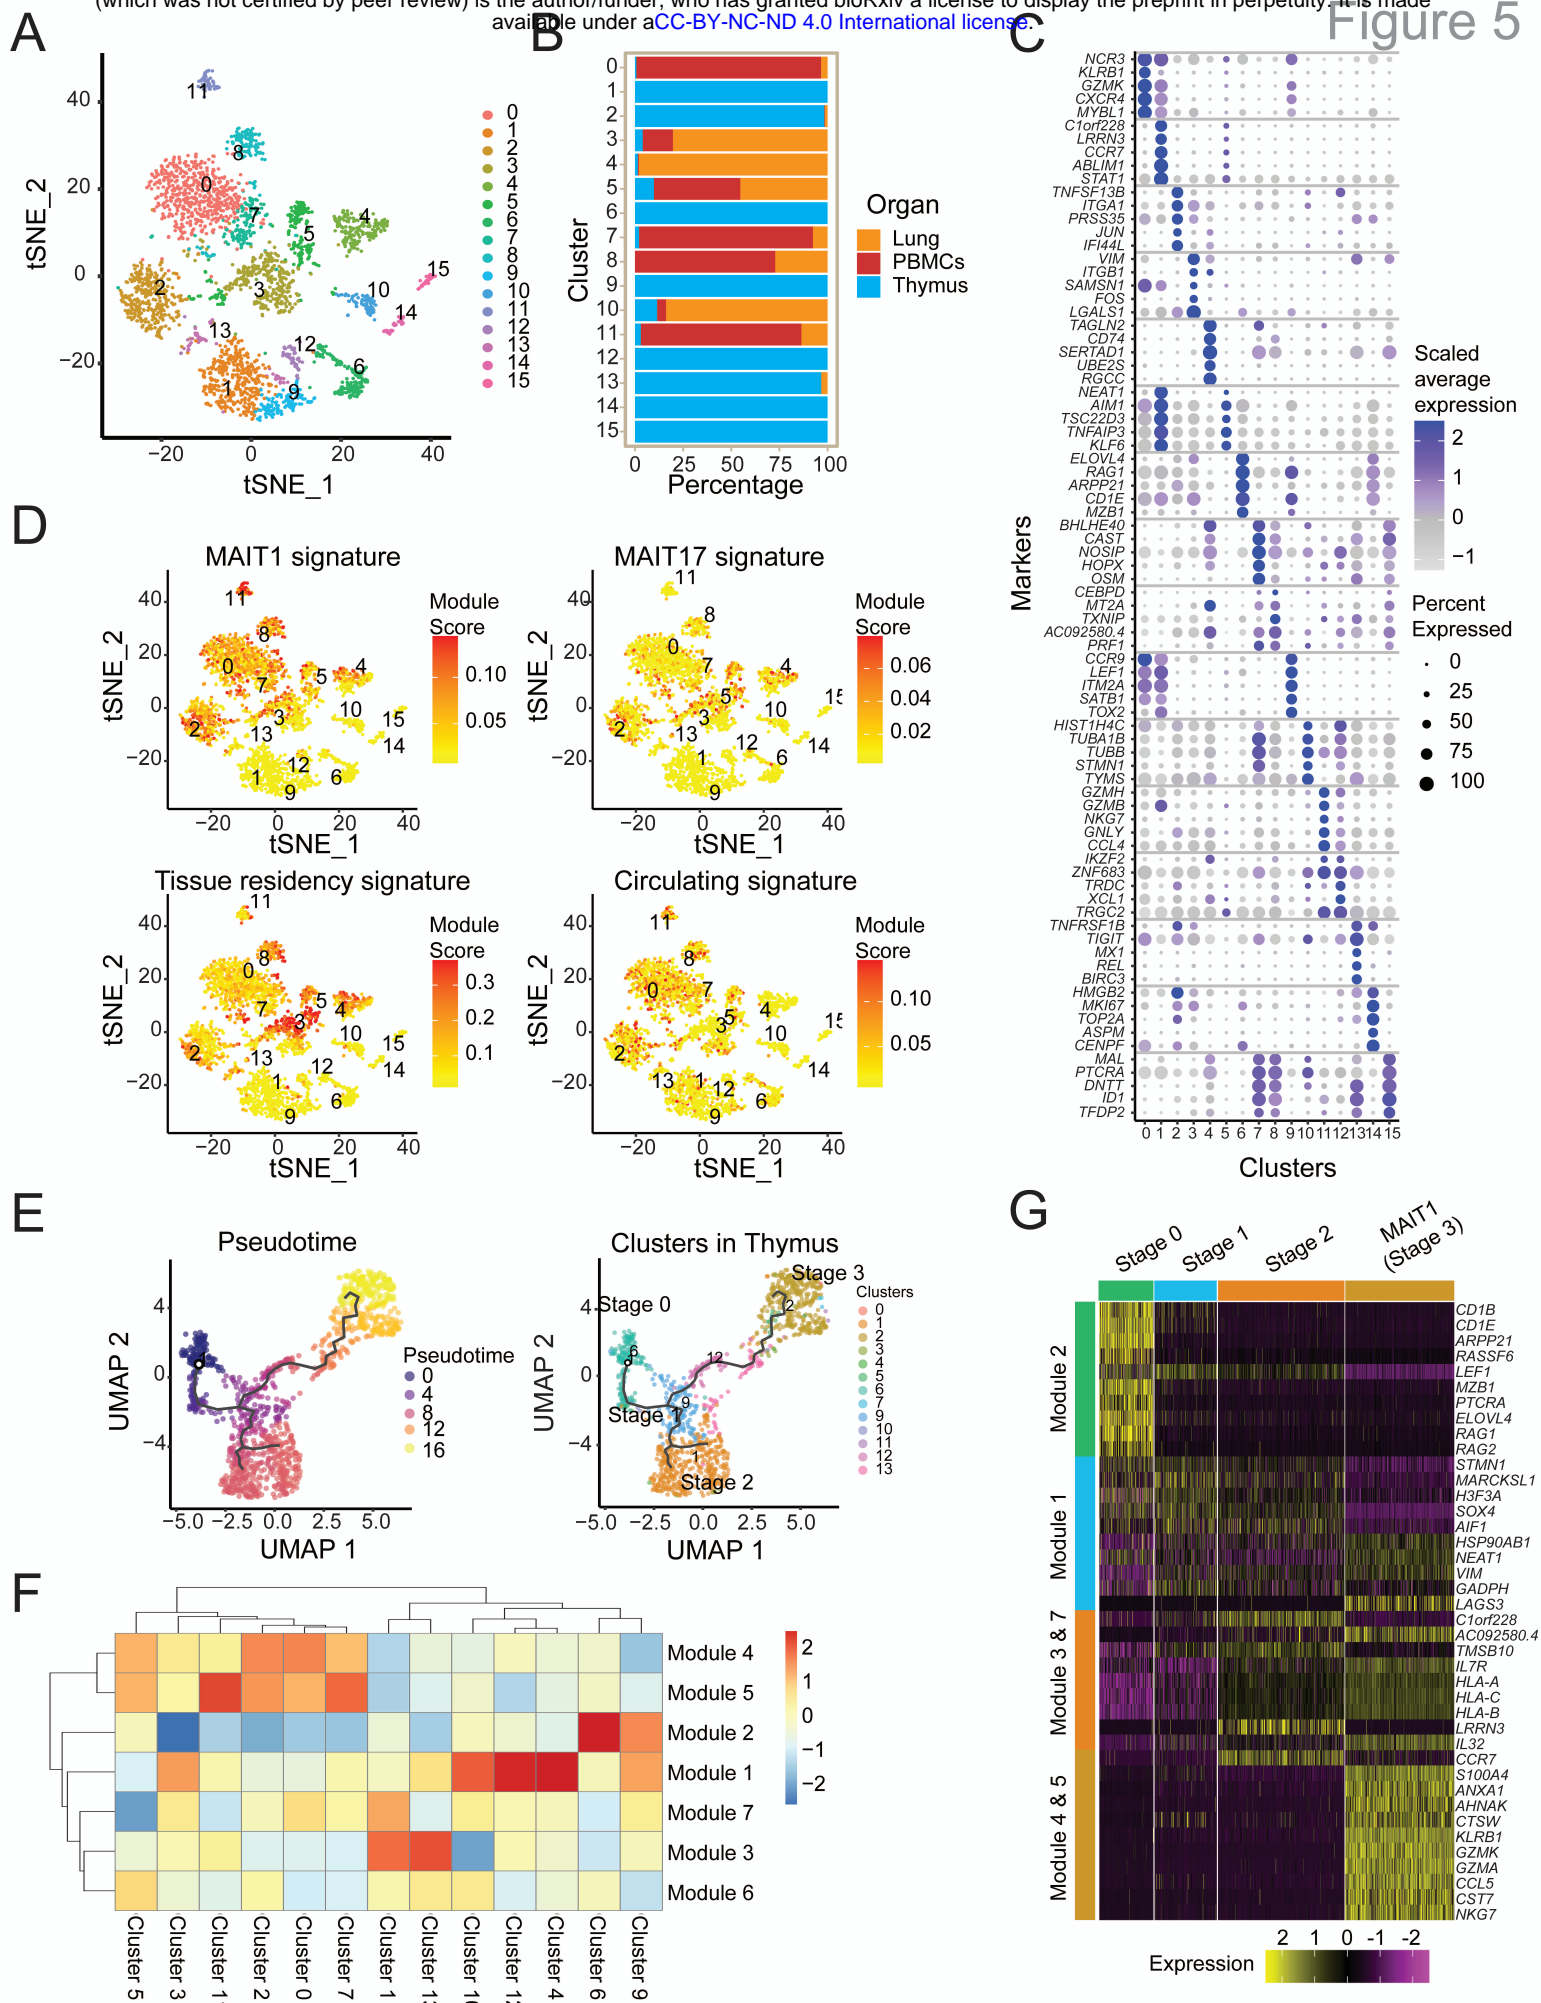

A

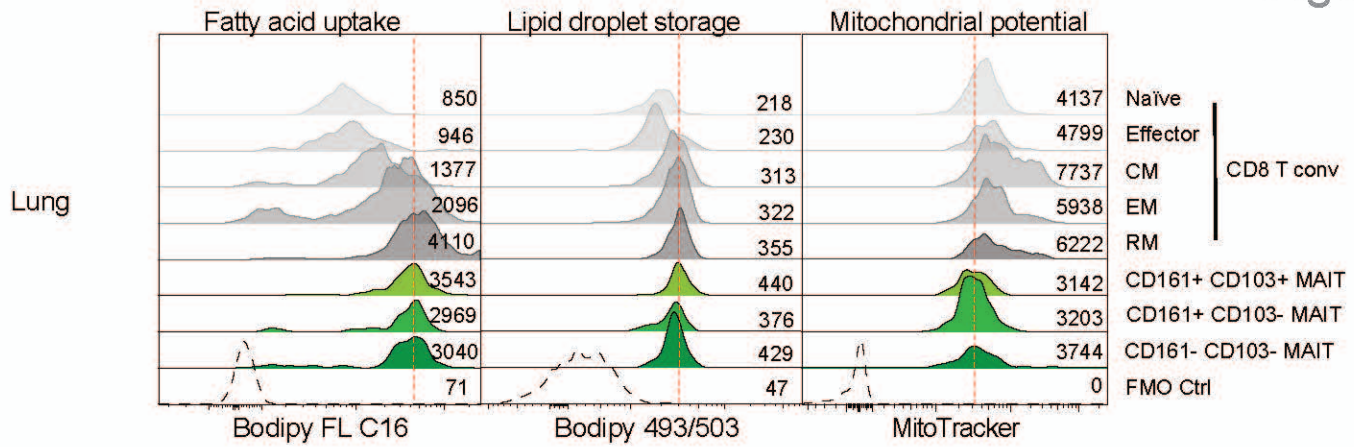

B

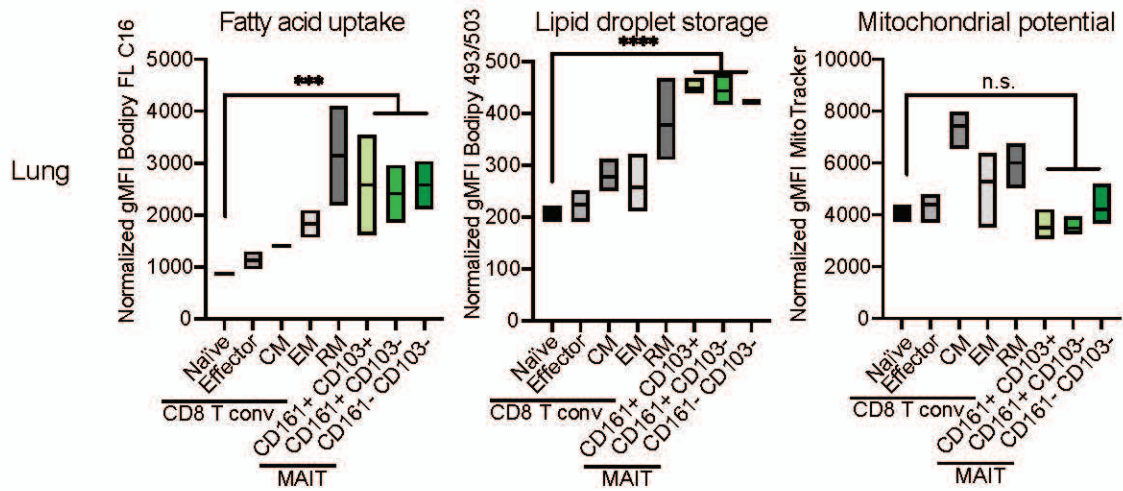

C

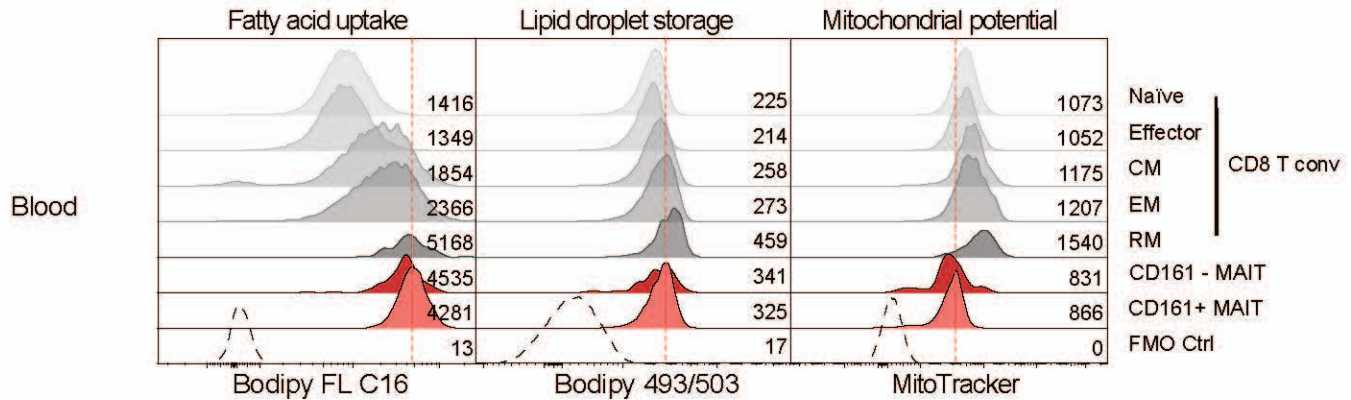

D

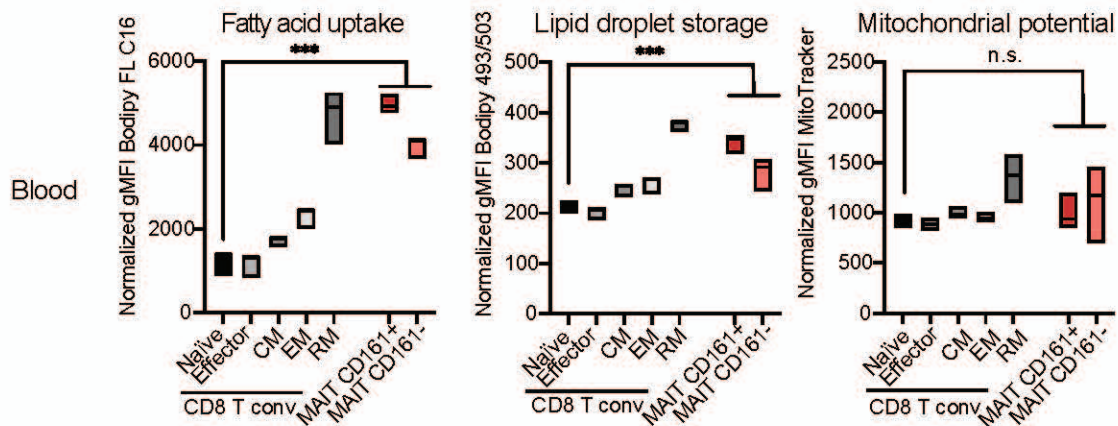



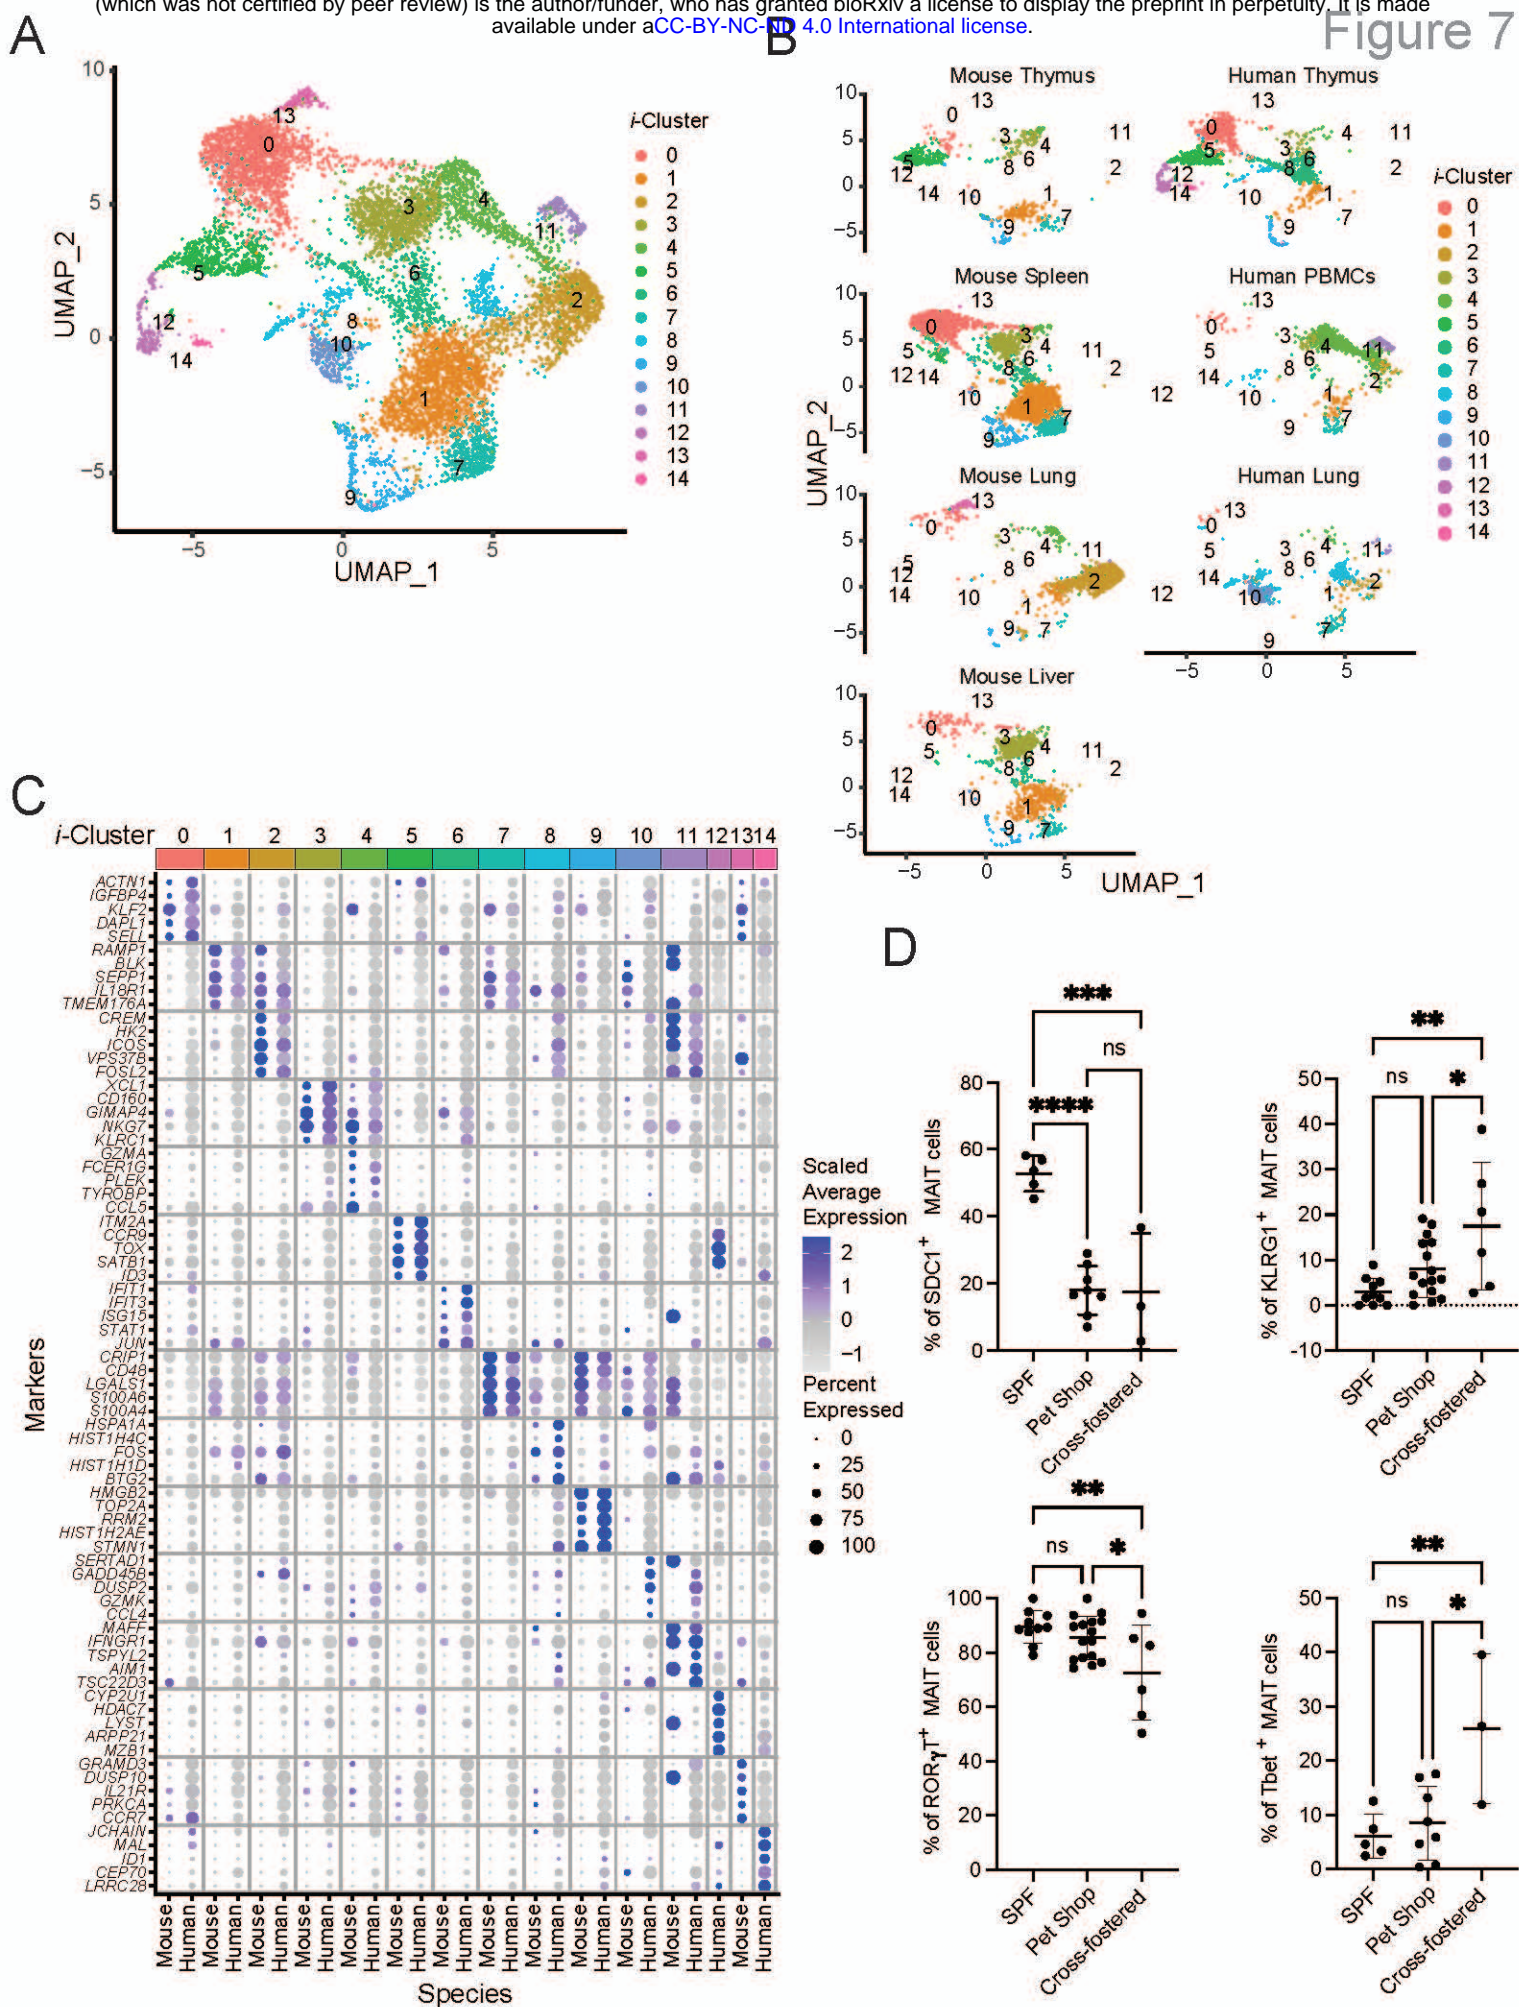

A

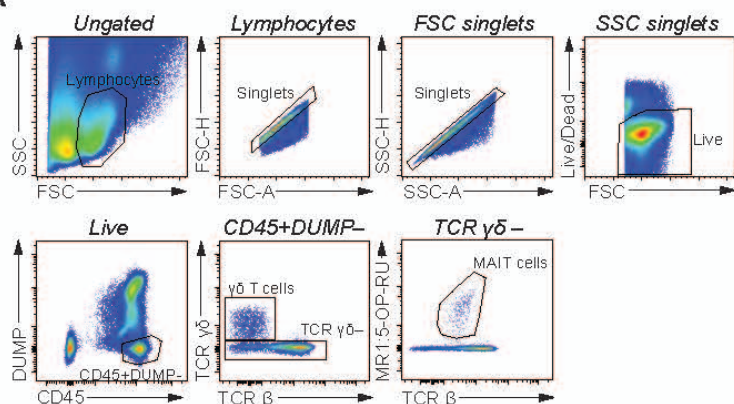

B

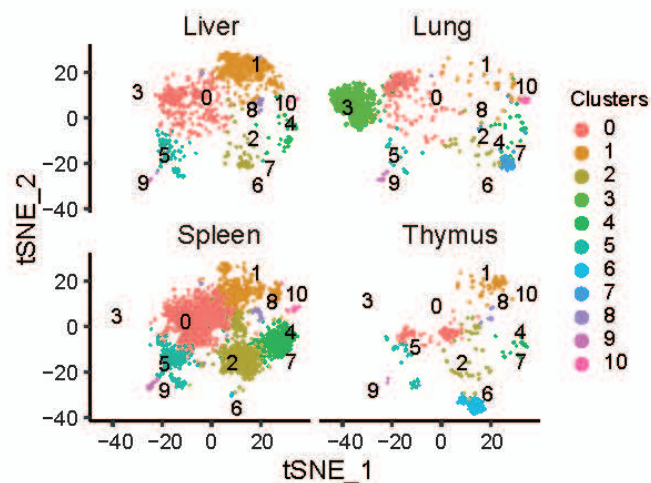

C

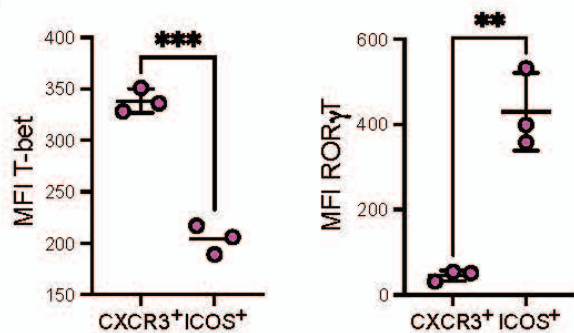

D

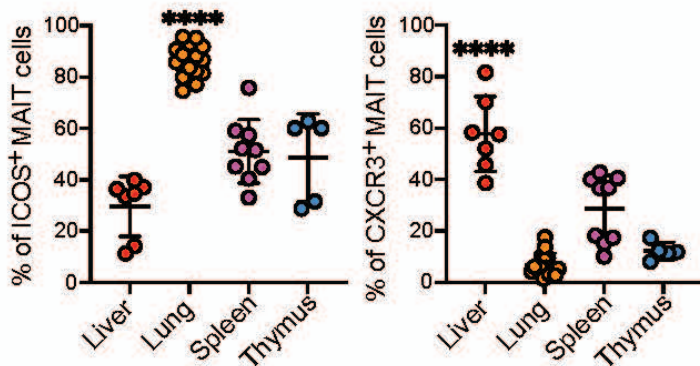

E

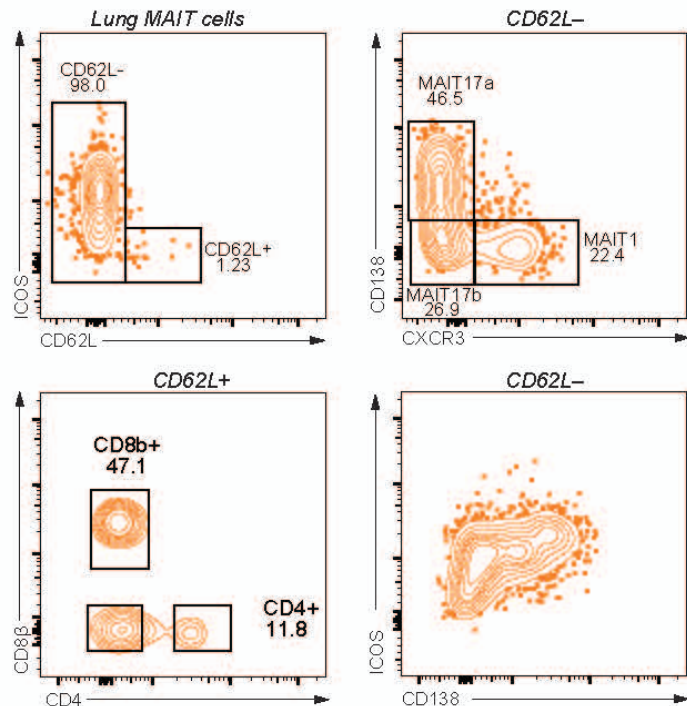

F

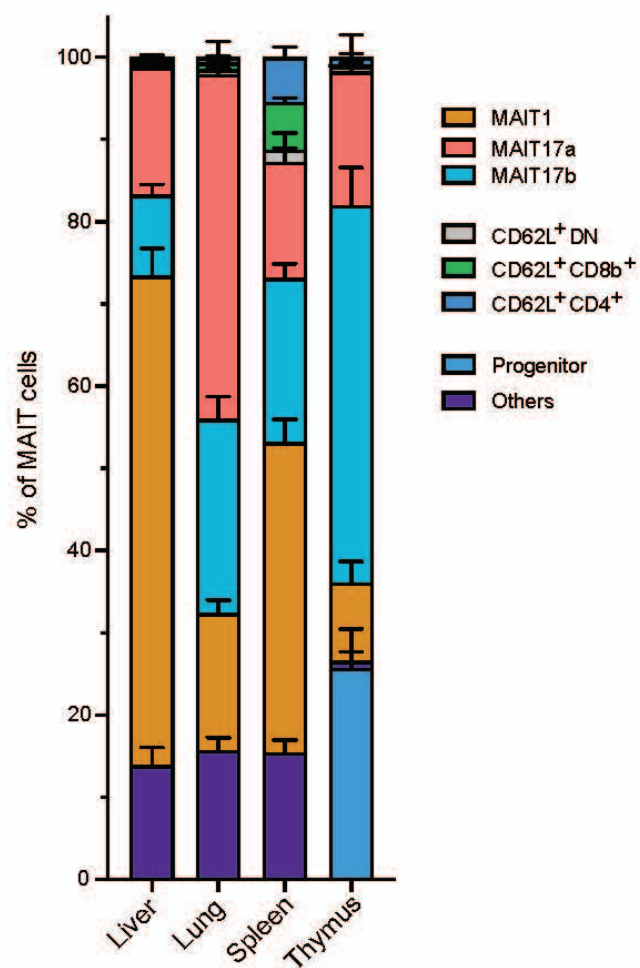



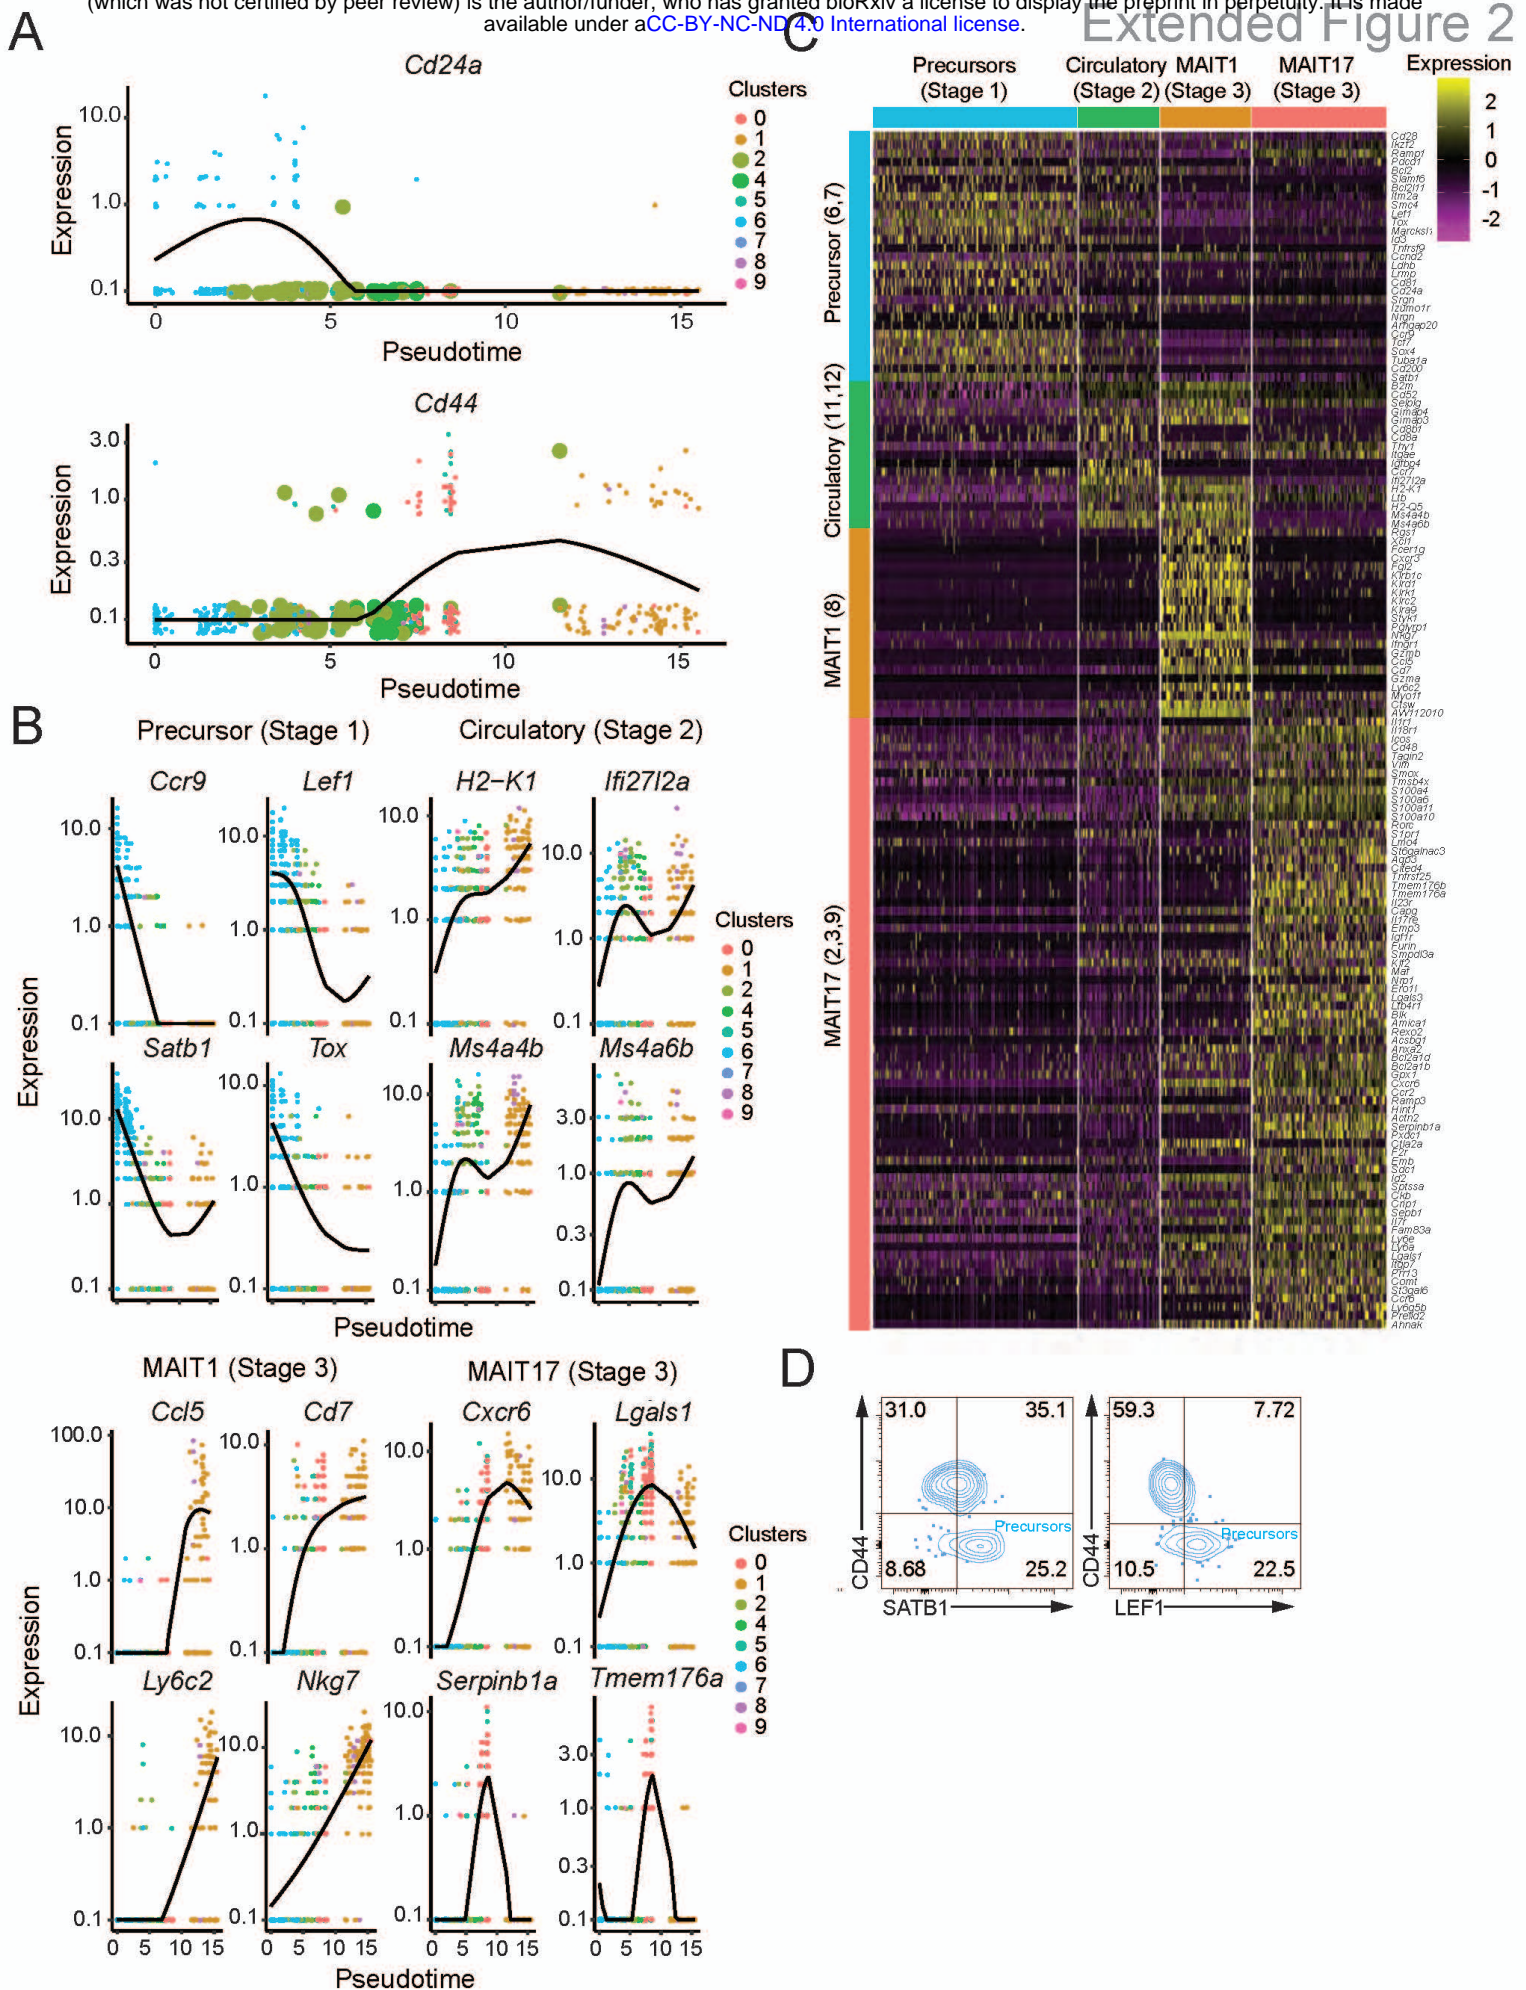

A

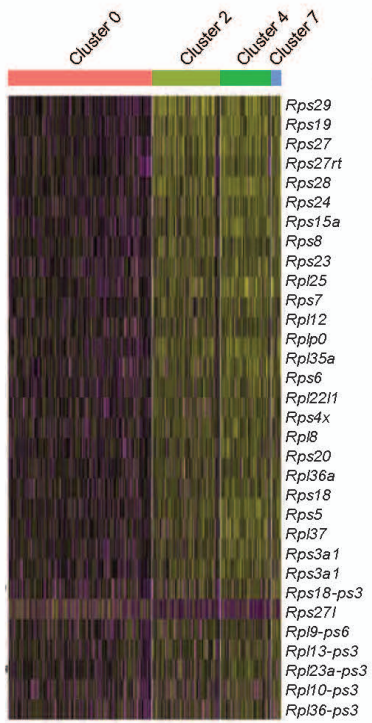

B

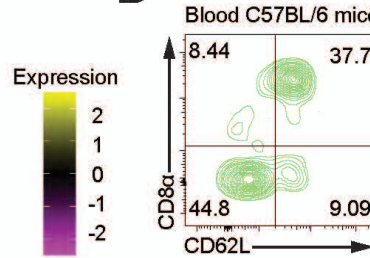

C

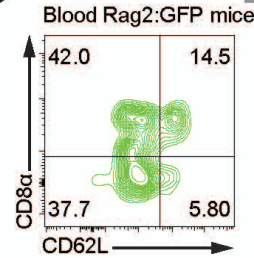

D

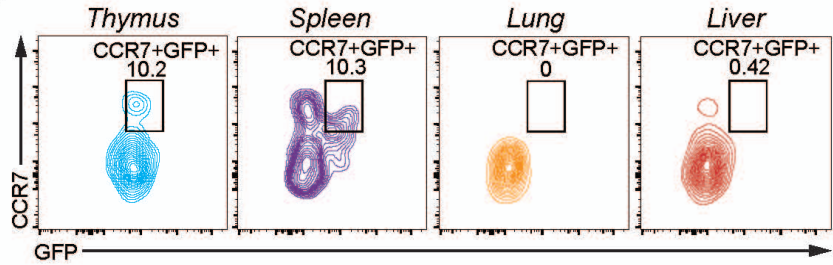

E

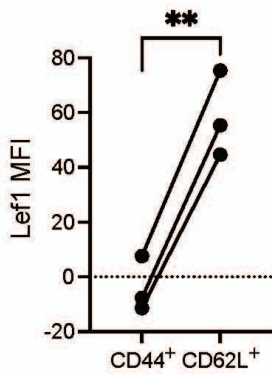

F

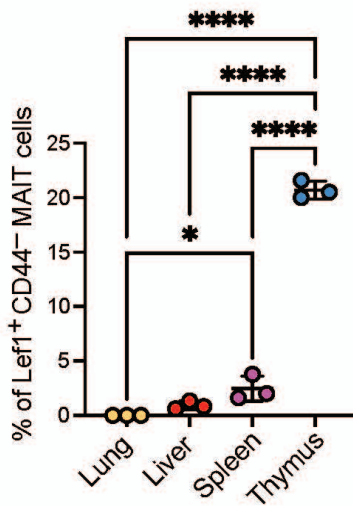



A

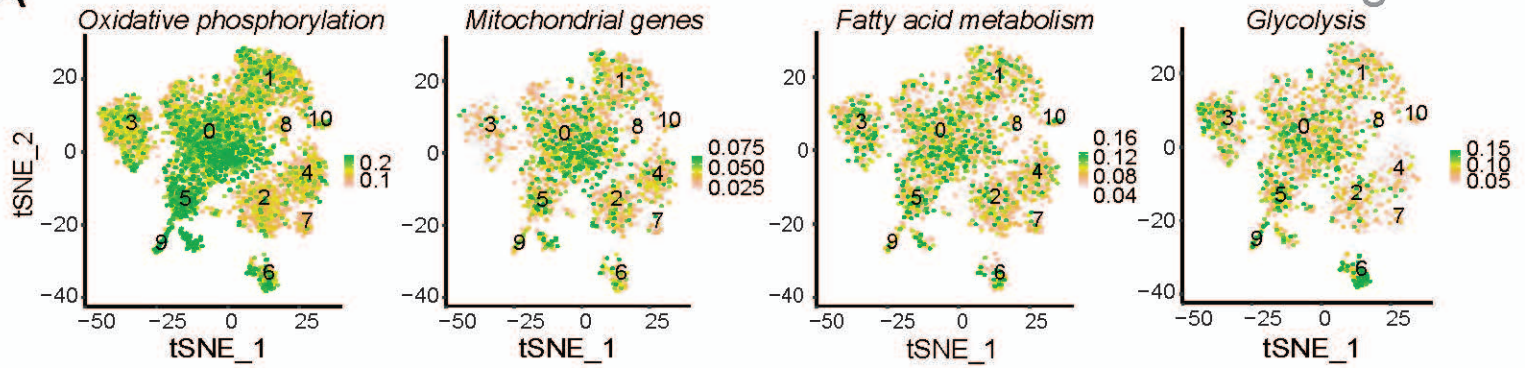

B

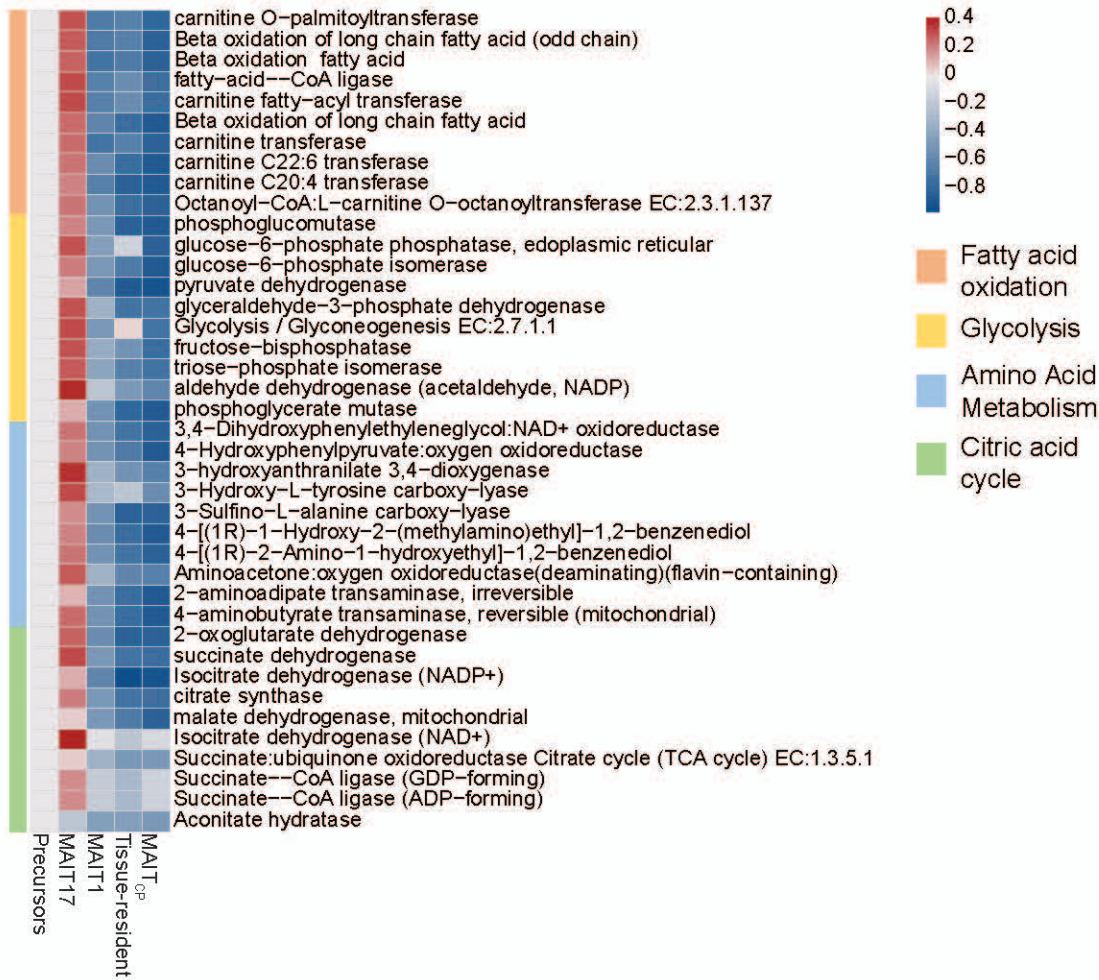

A

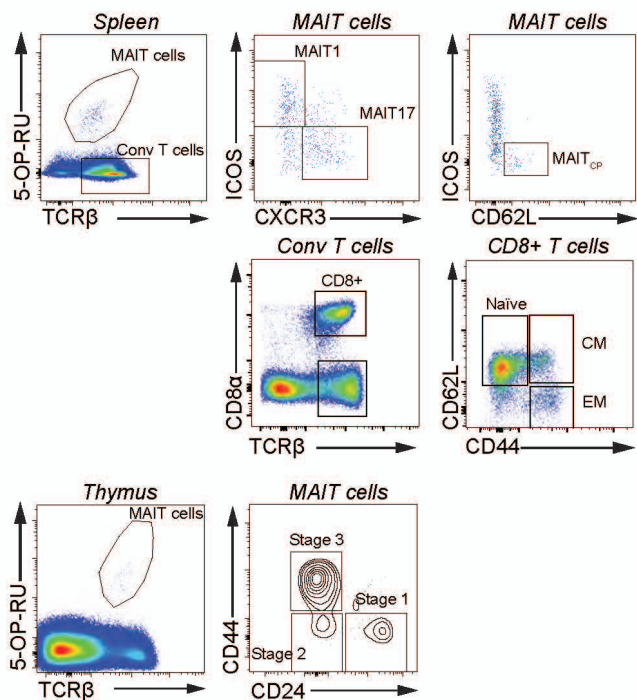

B

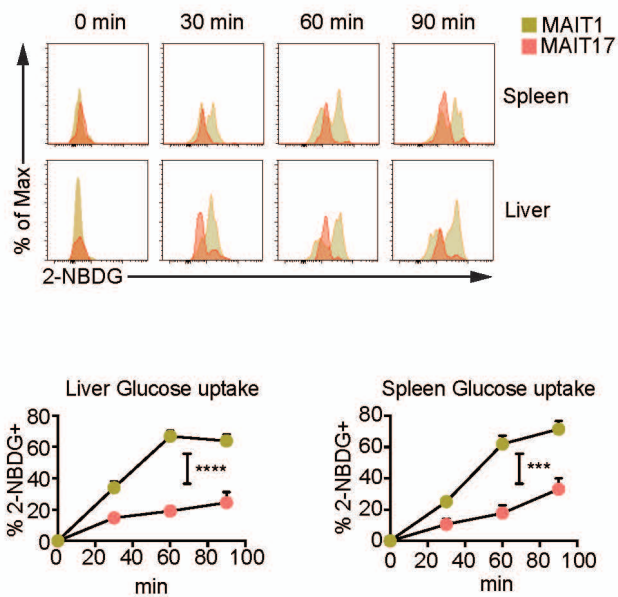

Extended Figure 5

A

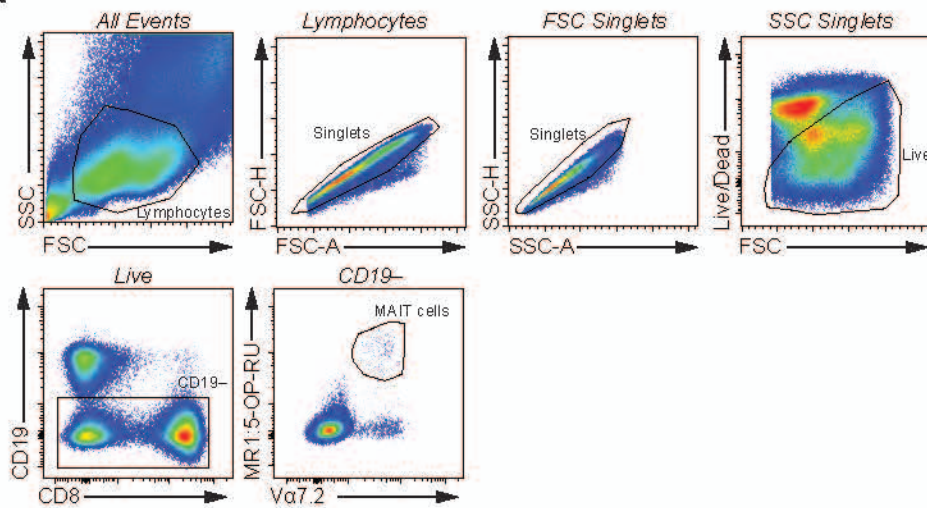

B Extended Figure 6

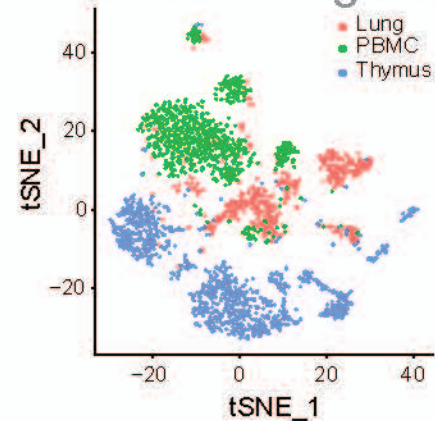

C

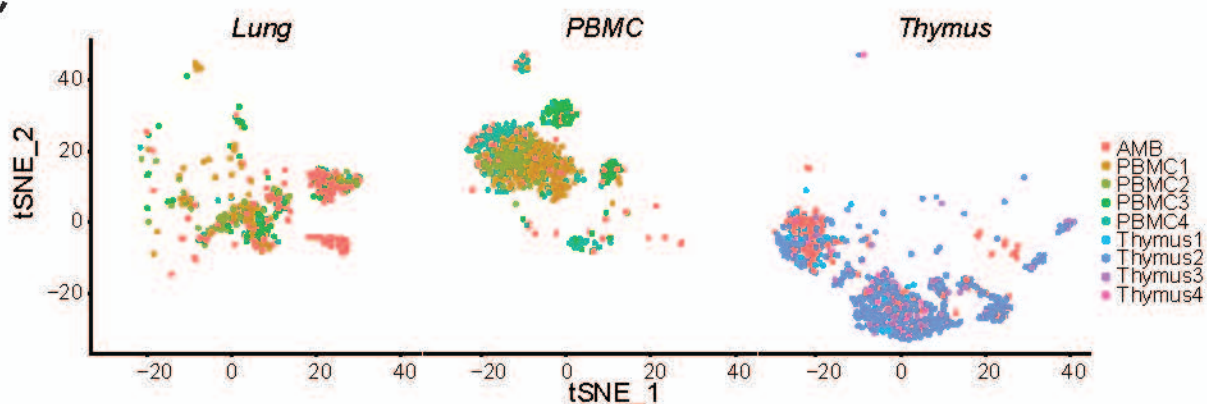

D

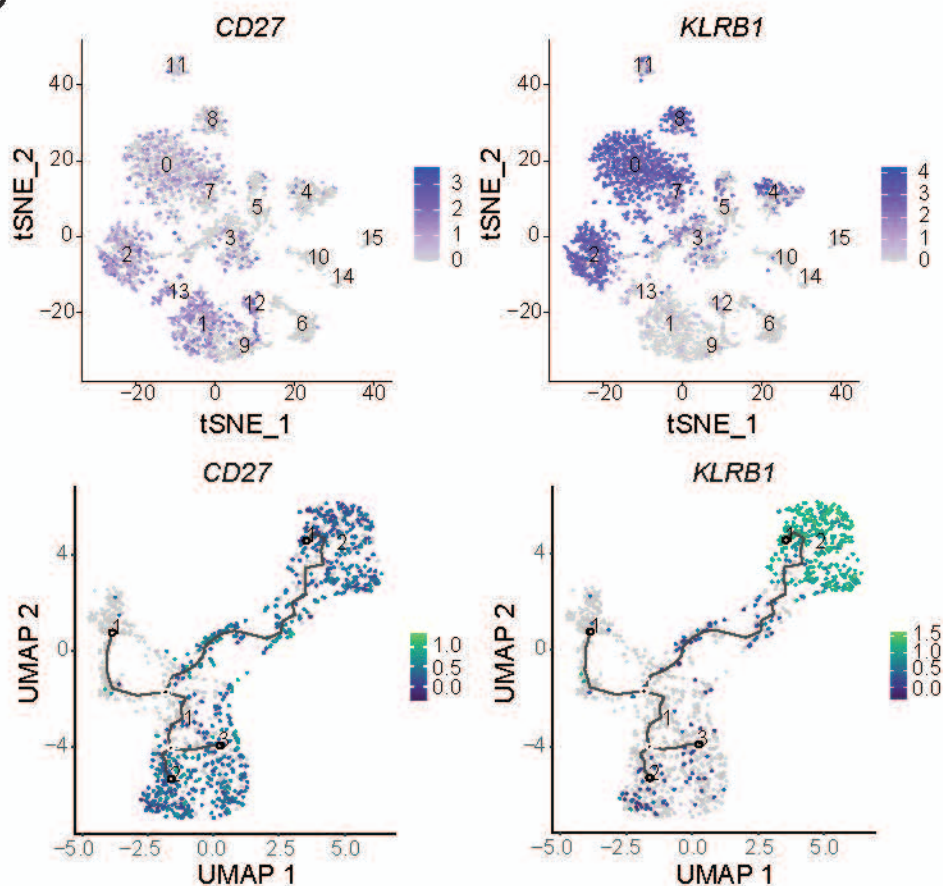



A

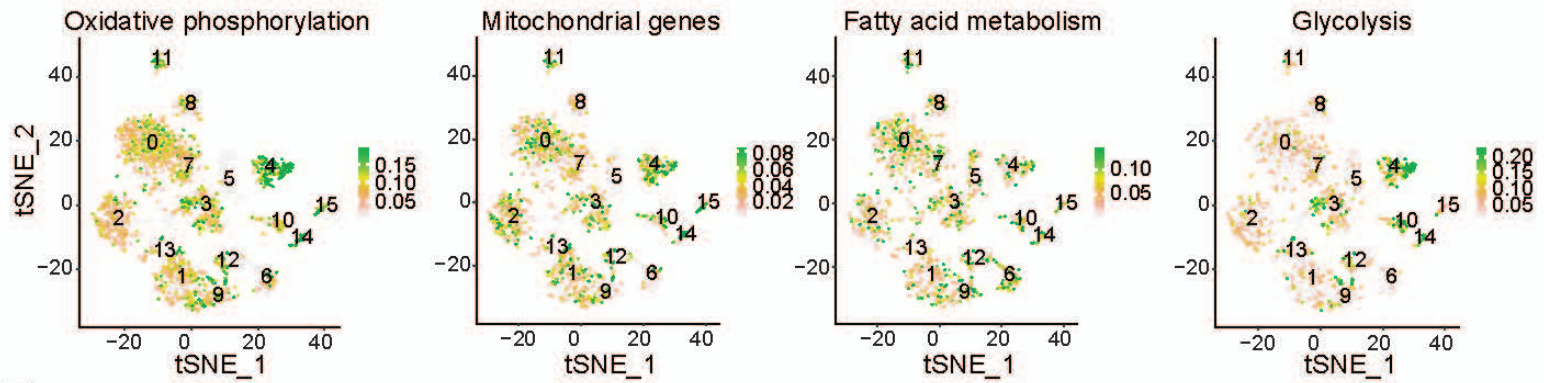

B

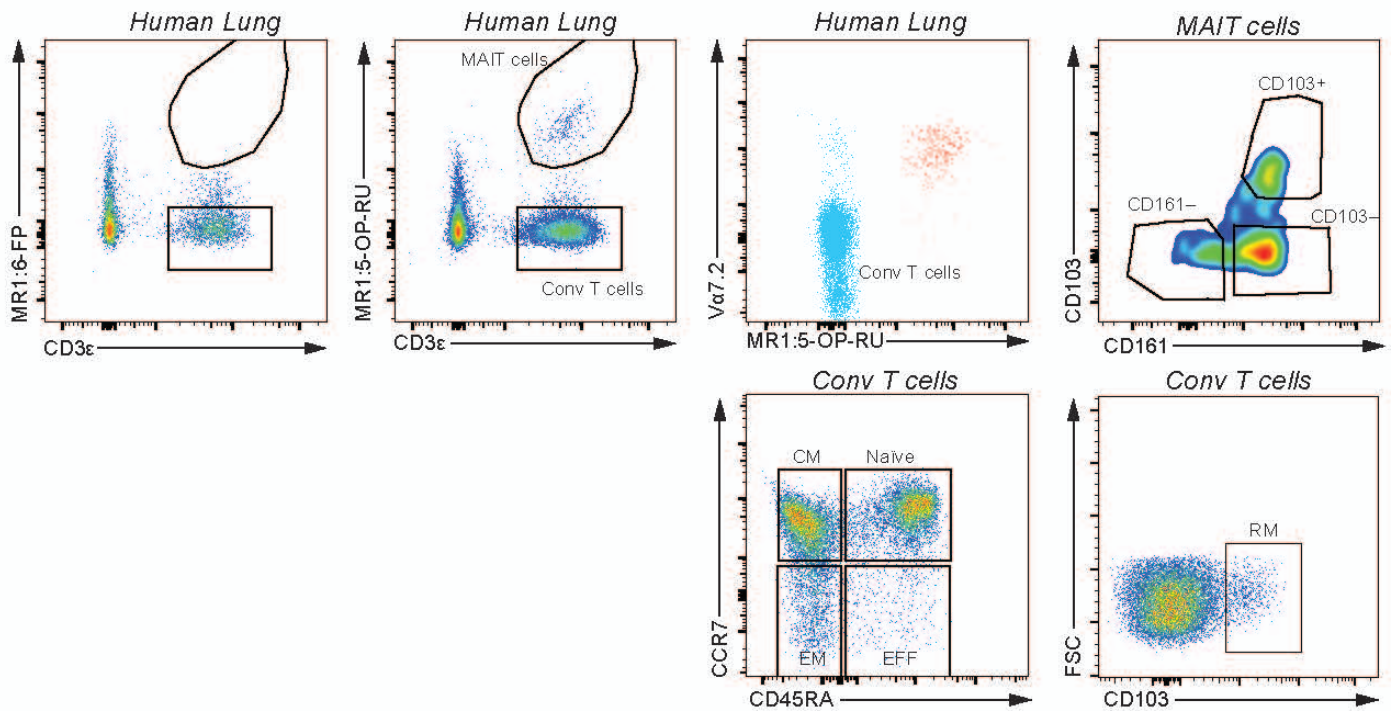

C

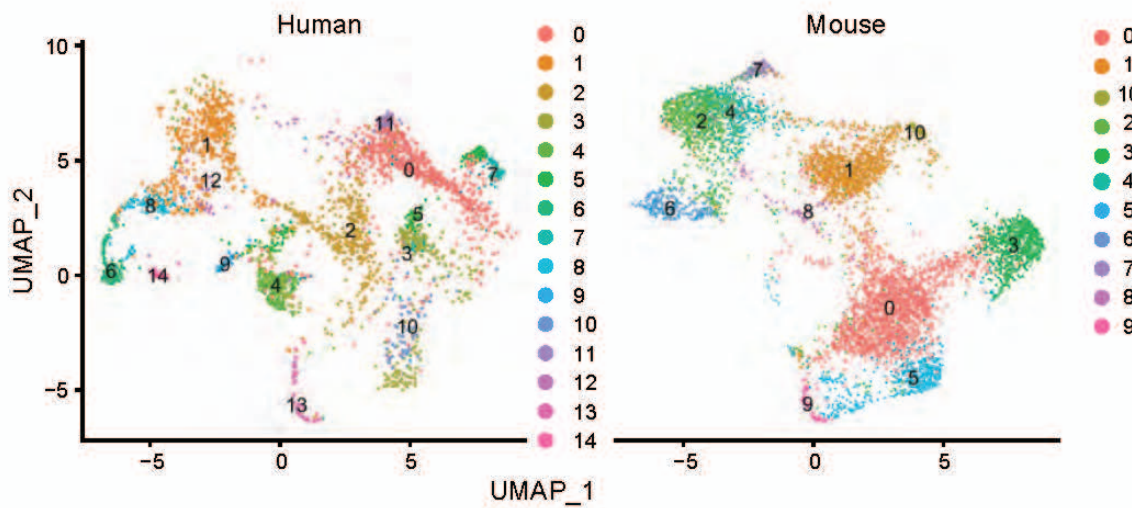



A

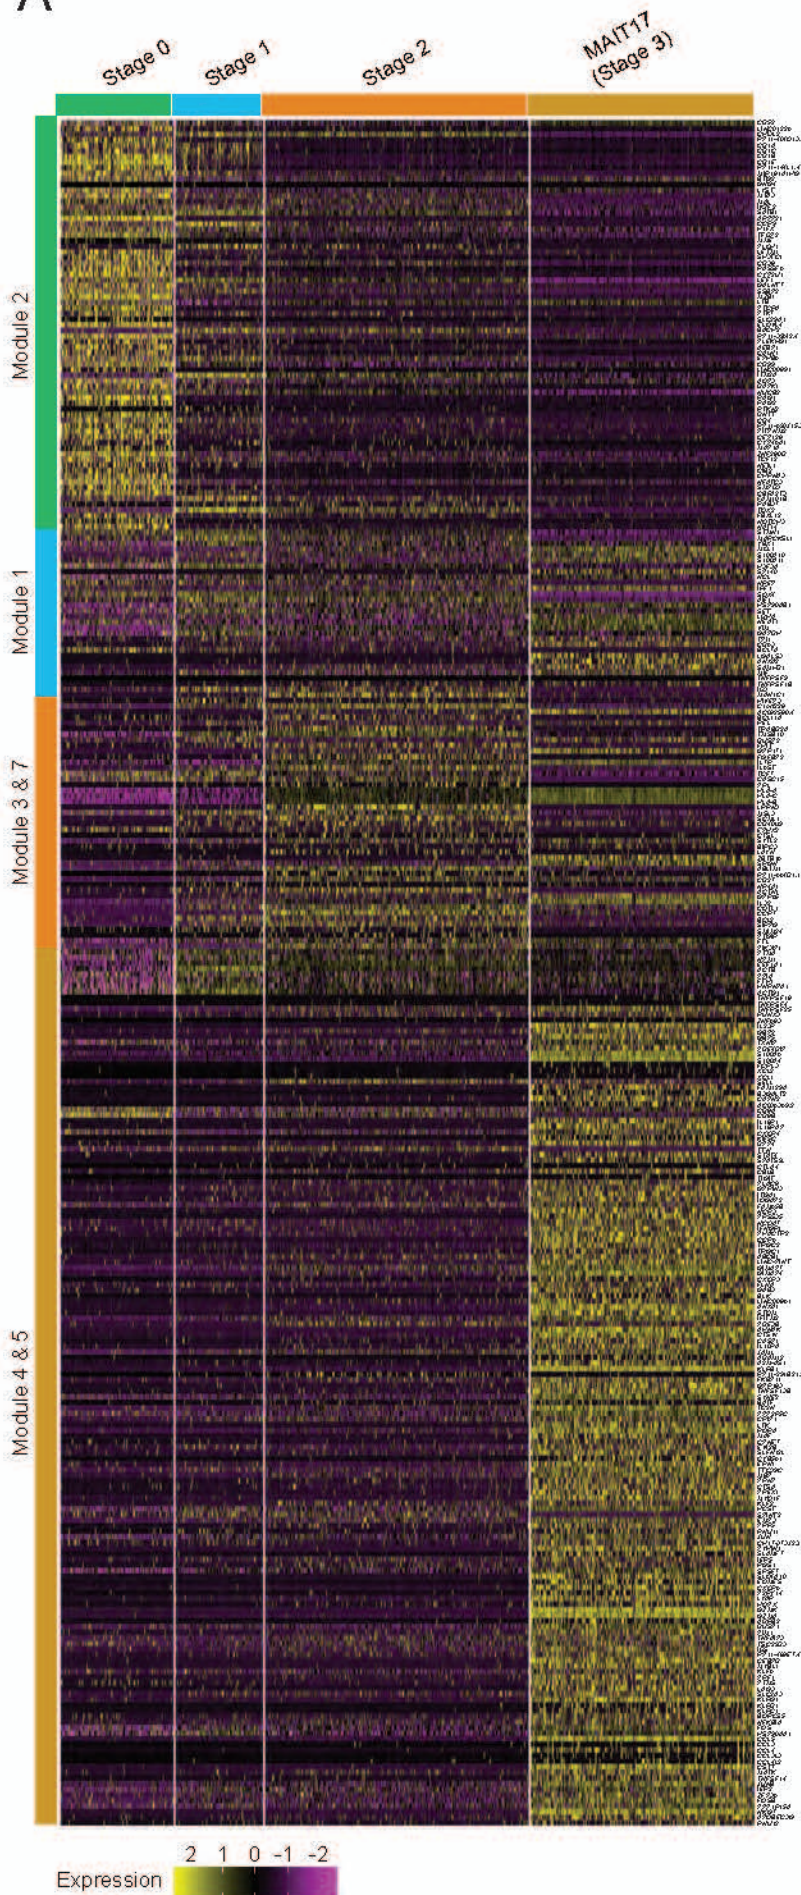

B

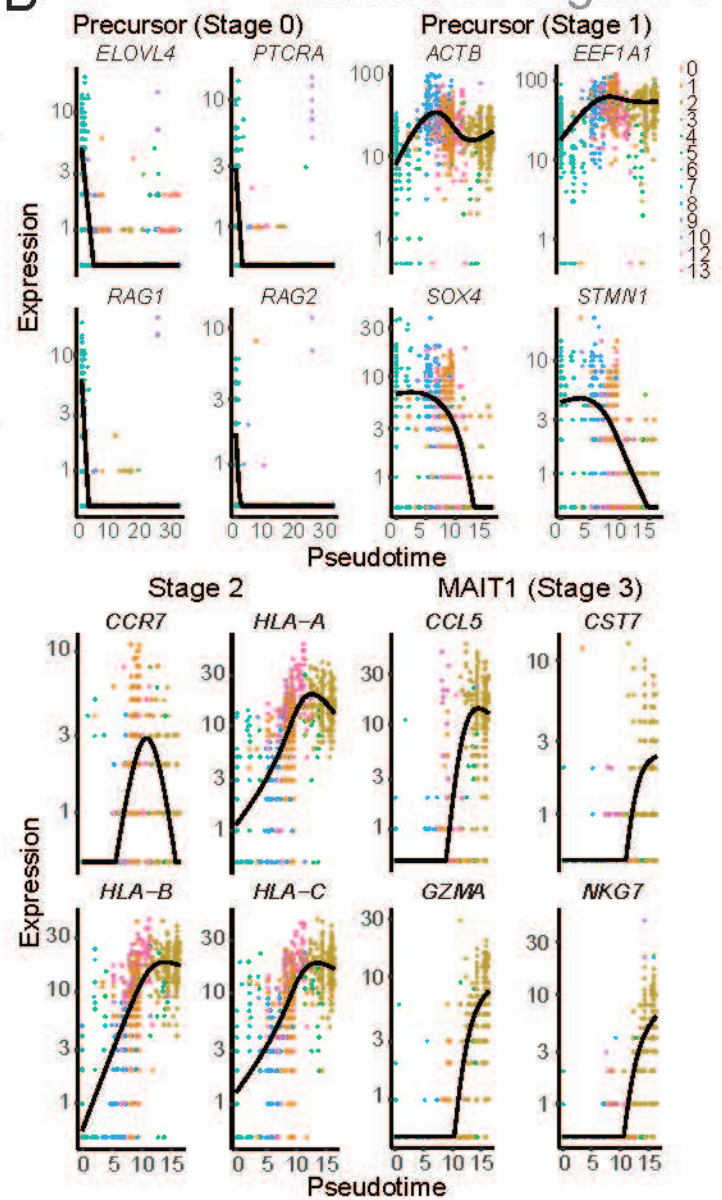



A

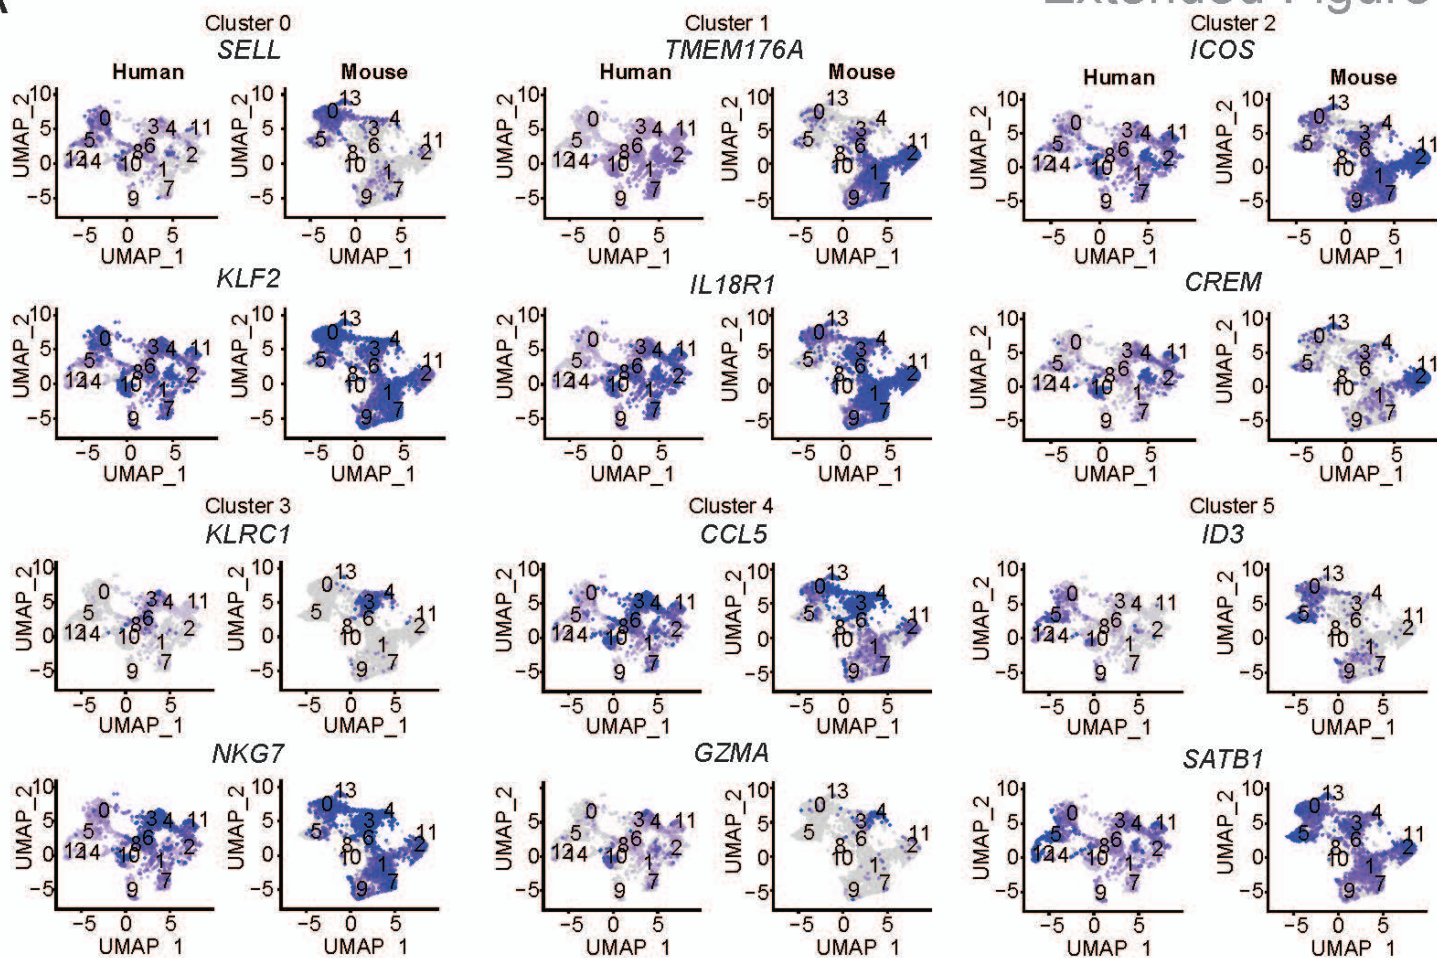

B

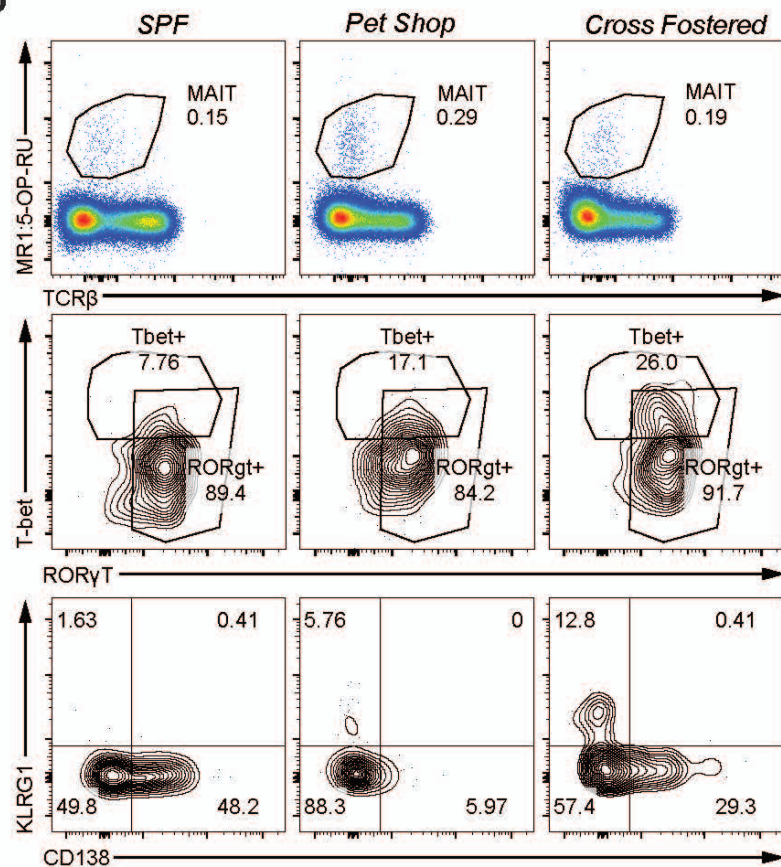

C

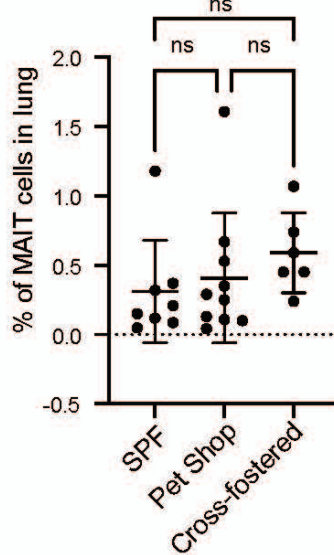

Source: https://www.biorxiv.org/content/10.1101/2021.12.20.473182v1.full.pdf
